# Supplementary material for: Establishment of Organoids From Human Epithelioid Sarcoma With the Air-Liquid Interface Organoid Cultures
Source: Front Oncol. 2022 May 23;12:893592. doi: 10.3389/fonc.2022.893592 (PMC9169059; doi:10.3389/fonc.2022.893592)
Supplement: Supplementary file 10 [file Table_3.xlsx]

## Sheet: Sheet1
Table S3 Upregulated gene list in EPS ODX compared to the normal tissue at fold changes >2.
ID	Symbol	ExpMean	Exp Samples A	Exp Samples B	log2FC	lfcSE	Stat	p-value	padj
ENSG00000134339.8	SAA2	4877.66	0.381	7316.3	12.372	2.837	3.894	9.8e-5	8.8e-4
ENSG00000236571.1	AC245102.2	1214.42	0	1821.62	10.832	3.703	2.89	0.004	0.022
ENSG00000229230.3	MT1P3	1056.05	0	1584.07	10.63	4.229	2.477	0.013	0.06
ENSG00000234975.6	FTH1P2	1088.8	0.443	1632.98	10.145	1.81	5.913	3.4e-9	7.4e-8
ENSG00000176043.5	AC007160.1	603.276	0	904.915	9.823	3.403	3.347	8.2e-4	0.006
ENSG00000185641.6	AC034236.1	481.97	0	722.955	9.5	5.948	3.878	1.1e-4	9.4e-4
ENSG00000137673.8	MMP7	437.479	0	656.219	9.36	2.106	6.746	1.5e-11	4.8e-10
ENSG00000242675.1	RPS16P9	475.983	0.256	713.847	9.153	1.831	5.258	1.5e-7	2.5e-6
ENSG00000111057.10	KRT18	770.46	1.202	1155.09	9.036	0.593	14.347	1.1e-46	2.7e-44
ENSG00000243423.1	AC004223.1	733.082	1.186	1099.03	8.975	1.798	4.822	1.4e-6	1.9e-5
ENSG00000271134.1	AC012498.2	333.58	0	500.37	8.97	3.575	3.101	0.002	0.012
ENSG00000230204.1	FTH1P5	556.864	0.716	834.938	8.928	1.398	6.461	1.0e-10	2.9e-9
ENSG00000196611.4	MMP1	347.849	0.109	521.719	8.88	0.98	11.081	1.6e-28	1.8e-26
ENSG00000166920.12	C15orf48	302.366	0	453.549	8.828	2.147	6.011	1.8e-9	4.2e-8
ENSG00000235817.2	AL158214.1	538.973	0.914	808.002	8.724	1.434	5.998	2.0e-9	4.6e-8
ENSG00000115009.12	CCL20	446.403	0.596	669.307	8.714	1.326	7.728	1.1e-14	4.8e-13
ENSG00000162366.7	PDZK1IP1	306.324	0.153	459.409	8.641	1.554	6.866	6.6e-12	2.2e-10
ENSG00000163739.4	CXCL1	345.974	0.303	518.809	8.64	1.035	9	2.3e-19	1.5e-17
ENSG00000271159.1	HINT1P2	249.173	0	373.76	8.55	2.401	3.8	1.4e-4	0.001
ENSG00000170421.12	KRT8	548.377	1.233	821.949	8.526	0.576	14.09	4.4e-45	1.0e-42
ENSG00000228085.1	AC009296.1	242.355	0	363.532	8.51	2.545	3.184	0.001	0.009
ENSG00000226718.1	SNRPGP8	237.512	0	356.268	8.481	2.405	3.716	2.0e-4	0.002
ENSG00000171345.13	KRT19	314.558	0.348	471.663	8.454	0.801	11.239	2.6e-29	3.3e-27
ENSG00000118785.13	SPP1	608.524	1.763	911.905	8.368	0.845	12.374	3.6e-35	5.9e-33
ENSG00000243314.1	AC106707.2	209.486	0	314.228	8.3	3.632	2.874	0.004	0.023
ENSG00000181524.6	RPL24P4	293.246	0.419	439.66	8.279	1.829	4.855	1.2e-6	1.7e-5
ENSG00000137731.13	FXYD2	312.041	0.561	467.782	8.23	1.003	8.207	2.3e-16	1.2e-14
ENSG00000230807.1	AC099535.1	198.056	0	297.084	8.22	2.354	4.384	1.2e-5	1.3e-4
ENSG00000239527.1	RPS23P7	344.316	0.736	516.107	8.219	1.46	5.666	1.5e-8	2.9e-7
ENSG00000176378.8	PFN1P10	190.917	0	286.375	8.167	2.328	4.209	2.6e-5	2.6e-4
ENSG00000236191.3	RPS15AP25	282.406	0.497	423.361	8.147	1.83	4.68	2.9e-6	3.7e-5
ENSG00000242209.1	AC006445.1	183.133	0	274.7	8.107	2.308	4.544	5.5e-6	6.6e-5
ENSG00000227794.5	RPS18	1606.02	7.909	2405.08	8.077	3.133	2.175	0.03	0.116
ENSG00000217644.5	AL355864.1	177.733	0	266.599	8.064	3.367	3.352	8.0e-4	0.006
ENSG00000235449.2	AC098934.3	175.972	0	263.959	8.05	5.949	1.36	0.174	0.447
ENSG00000271429.1	RPL17P51	174.355	0	261.532	8.036	2.438	3.545	3.9e-4	0.003
ENSG00000229194.7	HLA-V	183.249	0.061	274.843	8.022	1.207	6.068	1.3e-9	3.0e-8
ENSG00000041982.15	TNC	243.698	0.441	365.326	7.99	1.1	5.069	4.0e-7	6.1e-6
ENSG00000124875.9	CXCL6	170.806	0.043	256.188	7.946	1.673	6.736	1.6e-11	5.1e-10
ENSG00000196205.8	EEF1A1P5	232.692	0.466	348.805	7.899	0.955	8.767	1.8e-18	1.1e-16
ENSG00000230147.2	AL158071.1	156.444	0	234.666	7.881	2.315	4.619	3.9e-6	4.8e-5
ENSG00000198618.5	PPIAP22	263.335	0.7	394.653	7.862	1.404	5.86	4.6e-9	9.9e-8
ENSG00000197744.5	PTMAP2	395.397	1.578	592.307	7.846	1.43	5.175	2.3e-7	3.7e-6
ENSG00000115008.5	IL1A	159.012	0.067	238.485	7.811	1.167	8.982	2.7e-19	1.8e-17
ENSG00000236391.3	AC092573.2	147.889	0	221.834	7.8	2.451	3.453	5.6e-4	0.004
ENSG00000244485.1	RPL18P13	179.084	0.218	268.516	7.79	1.769	5.131	2.9e-7	4.6e-6
ENSG00000228453.1	RPS15AP9	146.794	0	220.192	7.789	2.402	4.159	3.2e-5	3.2e-4
ENSG00000233558.1	AL050331.1	139.845	0	209.768	7.72	3.283	3.476	5.1e-4	0.004
ENSG00000216519.2	AL023284.1	298.556	1.139	447.265	7.711	1.811	4.095	4.2e-5	4.1e-4
ENSG00000248448.2	COX5BP1	201.779	0.488	302.425	7.672	1.824	4.438	9.1e-6	1.0e-4
ENSG00000108821.13	COL1A1	775.757	4.713	1161.28	7.668	0.995	5.588	2.3e-8	4.5e-7
ENSG00000125618.16	PAX8	143.279	0.073	214.882	7.652	0.892	10.394	2.6e-25	2.6e-23
ENSG00000182492.15	BGN	747.872	4.689	1119.46	7.622	0.901	3.161	0.002	0.01
ENSG00000167642.12	SPINT2	136.53	0.053	204.769	7.611	1.042	8.772	1.8e-18	1.1e-16
ENSG00000240388.2	AC008799.1	173.088	0.345	259.46	7.597	1.823	4.596	4.3e-6	5.3e-5
ENSG00000197261.11	C6orf141	194.34	0.529	291.246	7.578	0.783	9.461	3.1e-21	2.4e-19
ENSG00000224834.1	BTF3P9	126.499	0	189.748	7.576	2.437	3.575	3.5e-4	0.003
ENSG00000242364.1	AC108725.1	126.025	0	189.038	7.57	2.374	4.214	2.5e-5	2.6e-4
ENSG00000243648.1	AC109454.1	159.884	0.287	239.683	7.547	1.791	4.758	2.0e-6	2.6e-5
ENSG00000234371.6	RPSAP31	141.144	0.143	211.644	7.539	1.765	5.288	1.2e-7	2.1e-6
ENSG00000240870.2	RPL19P14	120.003	0	180.004	7.5	2.277	4.811	1.5e-6	2.0e-5
ENSG00000119888.10	EPCAM	160.812	0.341	241.048	7.496	0.875	9.019	1.9e-19	1.3e-17
ENSG00000102575.10	ACP5	118.51	0	177.765	7.482	2.341	4.509	6.5e-6	7.7e-5
ENSG00000233697.2	HLA-DRB8	118.039	0	177.059	7.476	2.178	4.566	5.0e-6	6.0e-5
ENSG00000220131.1	AL121835.1	115.221	0	172.831	7.442	2.408	3.891	1.0e-4	8.9e-4
ENSG00000163347.5	CLDN1	185.445	0.613	277.862	7.434	0.673	10.9	1.1e-27	1.3e-25
ENSG00000214484.3	RPSAP28	126.152	0.105	189.176	7.428	1.824	5.285	1.3e-7	2.2e-6
ENSG00000213303.3	AC008481.1	161.704	0.459	242.326	7.382	1.821	4.282	1.9e-5	2.0e-4
ENSG00000256843.1	AC023157.2	108.847	0	163.27	7.36	3.376	2.069	0.039	0.143
ENSG00000275691.1	AC026461.4	108.333	0	162.5	7.353	2.724	2.955	0.003	0.018
ENSG00000228532.4	AC005000.1	107.297	0	160.946	7.339	2.61	3.286	0.001	0.007
ENSG00000270313.1	COX6CP16	107.206	0	160.809	7.338	5.949	1.298	0.194	0.485
ENSG00000214612.3	RPS19P1	106.339	0	159.508	7.327	2.382	4.179	2.9e-5	3.0e-4
ENSG00000165474.6	GJB2	117.936	0.122	176.842	7.308	1.104	8.4	4.5e-17	2.5e-15
ENSG00000243979.2	AC087752.1	149.507	0.453	224.033	7.275	1.452	5.342	9.2e-8	1.6e-6
ENSG00000213455.3	PPIAP82	100.708	0	151.062	7.249	2.298	4.478	7.5e-6	8.8e-5
ENSG00000261040.7	WFDC21P	160.056	0.586	239.791	7.246	1.439	5.372	7.8e-8	1.4e-6
ENSG00000105825.11	TFPI2	284.165	1.828	425.333	7.236	0.599	12.67	8.7e-37	1.5e-34
ENSG00000007038.10	PRSS21	109.844	0.107	164.713	7.226	1.551	6.045	1.5e-9	3.5e-8
ENSG00000149948.13	HMGA2	239.274	1.406	358.208	7.222	0.584	13.891	7.2e-44	1.6e-41
ENSG00000250580.1	SNRPCP8	96.587	0	144.88	7.189	2.633	2.829	0.005	0.025
ENSG00000224631.4	RPS27AP16	93.657	0	140.485	7.145	3.689	2.722	0.006	0.034
ENSG00000123496.7	IL13RA2	109.972	0.197	164.86	7.114	1.28	7.048	1.8e-12	6.3e-11
ENSG00000241282.1	RPL34P33	90.946	0	136.419	7.102	2.429	3.629	2.8e-4	0.002
ENSG00000254719.1	AC080023.2	90.71	0	136.064	7.099	2.642	2.766	0.006	0.03
ENSG00000230118.1	AC092569.1	90.293	0	135.439	7.092	2.502	3.165	0.002	0.01
ENSG00000234017.1	AC022018.1	229.102	1.522	342.892	7.091	1.88	3.522	4.3e-4	0.003
ENSG00000213486.3	AC108039.1	104.574	0.191	156.766	7.049	1.795	4.73	2.2e-6	2.9e-5
ENSG00000148346.11	LCN2	87.435	0	131.152	7.046	4.463	2.541	0.011	0.052
ENSG00000176890.15	TYMS	113.911	0.306	170.713	7.039	0.903	9.234	2.6e-20	1.9e-18
ENSG00000233597.3	AC133435.1	214.405	1.488	320.863	7.015	1.196	5.493	3.9e-8	7.4e-7
ENSG00000125726.10	CD70	85.477	0	128.215	7.014	2.153	5.273	1.3e-7	2.3e-6
ENSG00000166803.12	PCLAF	125.115	0.471	187.437	7.001	0.8	7.886	3.1e-15	1.4e-13
ENSG00000231293.1	RPL36AP6	84.472	0	126.708	6.997	2.484	3.453	5.5e-4	0.004
ENSG00000238008.1	COX6CP10	233.791	1.761	349.806	6.989	1.922	3.354	8.0e-4	0.006
ENSG00000213352.3	GAPDHP44	82.974	0	124.461	6.971	3.492	3.37	7.5e-4	0.005
ENSG00000230106.1	SNRPCP15	82.067	0	123.1	6.955	2.756	2.522	0.012	0.054
ENSG00000091129.19	NRCAM	85.75	0.048	128.601	6.95	1.163	8.469	2.5e-17	1.4e-15
ENSG00000234619.1	RPL7P11	81.445	0	122.167	6.944	3.573	3.02	0.003	0.015
ENSG00000254500.1	RANP3	80.7	0	121.05	6.931	2.523	3.163	0.002	0.01
ENSG00000263961.7	RHEX	80.548	0	120.822	6.929	2.151	5.402	6.6e-8	1.2e-6
ENSG00000196565.14	HBG2	80.063	0	120.094	6.92	2.475	3.37	7.5e-4	0.005
ENSG00000229338.1	AL136084.1	209.594	1.635	313.573	6.899	1.514	4.222	2.4e-5	2.5e-4
ENSG00000100558.8	PLEK2	77.995	0	116.992	6.883	2.132	5.574	2.5e-8	4.8e-7
ENSG00000166670.9	MMP10	76.783	0	115.174	6.86	2.185	5.768	8.0e-9	1.7e-7
ENSG00000047457.13	CP	127.626	0.655	191.112	6.859	0.726	9.588	9.0e-22	7.2e-20
ENSG00000226781.1	TBCAP1	74.704	0	112.056	6.821	2.461	3.433	6.0e-4	0.004
ENSG00000233838.5	DPH3P1	74.19	0	111.285	6.811	2.647	2.856	0.004	0.024
ENSG00000164692.17	COL1A2	1052.09	13.035	1571.62	6.808	1.019	3.844	1.2e-4	0.001
ENSG00000175793.11	SFN	100.588	0.356	150.705	6.806	0.806	9.134	6.6e-20	4.7e-18
ENSG00000230678.10	BRD2	73.25	0	109.875	6.793	2.815	2.429	0.015	0.067
ENSG00000236773.1	AC092809.3	73.096	0	109.645	6.79	3.272	2.25	0.024	0.099
ENSG00000226986.4	AC092017.1	72.618	0	108.927	6.78	3.546	2.997	0.003	0.016
ENSG00000133101.9	CCNA1	75.794	0.043	113.67	6.78	1.573	6.369	1.9e-10	5.1e-9
ENSG00000241030.1	RPL29P24	97.783	0.352	146.499	6.77	1.874	4.017	5.9e-5	5.6e-4
ENSG00000231344.1	AL020997.1	71.131	0	106.696	6.751	2.423	3.552	3.8e-4	0.003
ENSG00000235673.1	AL929472.4	70.988	0	106.483	6.748	2.308	4.634	3.6e-6	4.5e-5
ENSG00000103485.17	QPRT	193.845	1.711	289.913	6.746	0.554	10.893	1.2e-27	1.4e-25
ENSG00000006118.14	TMEM132A	132.664	0.87	198.561	6.737	0.792	7.665	1.8e-14	7.7e-13
ENSG00000226112.1	FCF1P4	69.984	0	104.977	6.728	2.886	2.29	0.022	0.092
ENSG00000270598.1	AL512343.1	69.585	0	104.378	6.719	2.876	2.221	0.026	0.105
ENSG00000240673.1	AC006539.1	69.548	0	104.322	6.719	2.406	4.073	4.6e-5	4.5e-4
ENSG00000235808.1	MYL6P2	69.133	0	103.7	6.71	2.376	3.922	8.8e-5	8.0e-4
ENSG00000275550.1	AL096712.1	68.058	0	102.087	6.688	3.009	2.093	0.036	0.136
ENSG00000254112.1	AP003467.2	124.081	0.812	185.716	6.688	1.917	3.474	5.1e-4	0.004
ENSG00000235071.1	AC073909.1	90.201	0.345	135.129	6.661	1.212	6.109	1.0e-9	2.4e-8
ENSG00000123610.4	TNFAIP6	91.651	0.377	137.288	6.65	0.783	9.056	1.3e-19	9.3e-18
ENSG00000189143.9	CLDN4	70.124	0.079	105.146	6.62	1.196	7.512	5.8e-14	2.4e-12
ENSG00000165496.4	RPL10L	71.963	0.117	107.886	6.607	1.776	4.87	1.1e-6	1.6e-5
ENSG00000231878.1	SNRPFP1	64.224	0	96.336	6.605	3.256	2.281	0.023	0.093
ENSG00000235377.1	AL158047.1	63.108	0	94.661	6.58	2.3	4.819	1.4e-6	2.0e-5
ENSG00000130429.13	ARPC1B	498.402	6.792	744.207	6.579	0.558	9.126	7.1e-20	5.0e-18
ENSG00000255749.1	GNAI2P1	116.265	0.837	173.979	6.574	1.851	3.505	4.6e-4	0.003
ENSG00000240210.3	AL122013.1	62.696	0	94.044	6.571	2.287	4.748	2.1e-6	2.7e-5
ENSG00000213488.4	AC008716.1	95.38	0.538	142.801	6.547	1.546	4.447	8.7e-6	1.0e-4
ENSG00000281374.1	AP000344.4	61.404	0	92.105	6.541	2.397	3.28	0.001	0.007
ENSG00000230758.1	SNAP23P1	61.151	0	91.727	6.535	2.594	2.771	0.006	0.029
ENSG00000217026.3	RPL10P1	82.355	0.345	123.36	6.531	1.467	4.965	6.9e-7	1.0e-5
ENSG00000220105.2	AL353151.1	60.595	0	90.892	6.522	2.325	4.352	1.4e-5	1.5e-4
ENSG00000227715.11	HLA-A	89.398	0.469	133.863	6.521	0.729	9.171	4.7e-20	3.3e-18
ENSG00000178773.14	CPNE7	60.288	0	90.432	6.515	2.134	5.124	3.0e-7	4.7e-6
ENSG00000165215.6	CLDN3	59.892	0	89.837	6.505	2.176	5.279	1.3e-7	2.2e-6
ENSG00000230037.1	UBBP1	158.908	1.631	237.546	6.503	1.246	4.837	1.3e-6	1.8e-5
ENSG00000157227.12	MMP14	188.521	2.167	281.698	6.48	0.535	10.491	9.5e-26	9.8e-24
ENSG00000165376.10	CLDN2	60.21	0.047	90.292	6.447	1.187	8.011	1.1e-15	5.5e-14
ENSG00000233406.5	AL162430.1	68.853	0.212	103.174	6.425	1.475	5.249	1.5e-7	2.6e-6
ENSG00000249851.1	RPS27AP18	56.263	0	84.395	6.416	2.378	3.868	1.1e-4	9.7e-4
ENSG00000270570.1	AC140113.1	55.993	0	83.99	6.409	3.108	1.868	0.062	0.207
ENSG00000140931.19	CMTM3	164.401	1.912	245.646	6.404	0.609	9.853	6.7e-23	5.7e-21
ENSG00000042493.15	CAPG	75.795	0.355	113.515	6.401	1.256	4.903	9.4e-7	1.3e-5
ENSG00000129038.15	LOXL1	128.106	1.292	191.513	6.392	0.785	6.119	9.4e-10	2.3e-8
ENSG00000102879.15	CORO1A	108.319	0.941	162.008	6.392	0.996	3.51	4.5e-4	0.003
ENSG00000197457.9	STMN3	95.205	0.747	142.434	6.36	0.63	9.798	1.2e-22	9.9e-21
ENSG00000169429.10	CXCL8	129.908	1.383	194.17	6.356	0.939	6.204	5.5e-10	1.4e-8
ENSG00000058085.14	LAMC2	111.029	1.043	166.022	6.354	0.672	12.58	2.7e-36	4.5e-34
ENSG00000225712.1	ATP5MC2P1	53.684	0	80.526	6.349	2.429	3.663	2.5e-4	0.002
ENSG00000226338.1	AC079150.2	53.557	0	80.335	6.346	3.507	1.882	0.06	0.202
ENSG00000213210.4	AC005229.2	53.021	0	79.532	6.331	5.948	1.466	0.143	0.388
ENSG00000111674.8	ENO2	93.742	0.755	140.236	6.33	0.814	7.671	1.7e-14	7.4e-13
ENSG00000229753.1	RPS27AP15	52.88	0	79.32	6.328	2.37	3.861	1.1e-4	9.9e-4
ENSG00000276667.1	AL158077.1	52.555	0	78.833	6.319	3.19	1.913	0.056	0.192
ENSG00000253368.3	TRNP1	113.573	1.151	169.784	6.311	0.67	8.966	3.1e-19	2.0e-17
ENSG00000066336.11	SPI1	90.01	0.714	134.659	6.306	1.066	4.547	5.4e-6	6.5e-5
ENSG00000164611.12	PTTG1	73.153	0.412	109.524	6.29	1.044	6.501	8.0e-11	2.2e-9
ENSG00000226915.1	AC068137.1	72.962	0.414	109.236	6.285	1.518	4.517	6.3e-6	7.4e-5
ENSG00000105246.5	EBI3	51.266	0	76.899	6.284	2.138	5.181	2.2e-7	3.6e-6
ENSG00000220660.2	AL023284.3	51.26	0	76.889	6.283	2.542	3.143	0.002	0.01
ENSG00000166523.7	CLEC4E	63.425	0.234	95.021	6.282	1.057	6.114	9.7e-10	2.3e-8
ENSG00000125538.11	IL1B	62.87	0.228	94.191	6.276	1.038	7.058	1.7e-12	5.9e-11
ENSG00000258947.6	TUBB3	74.497	0.473	111.509	6.255	1.01	8.099	5.6e-16	2.8e-14
ENSG00000136167.13	LCP1	70.8	0.402	106	6.254	1.004	4.869	1.1e-6	1.6e-5
ENSG00000235225.1	AC016712.1	77.626	0.536	116.171	6.254	1.975	3.339	8.4e-4	0.006
ENSG00000242335.8	CFB	56.229	0.139	84.274	6.226	0.868	9.126	7.1e-20	5.0e-18
ENSG00000185499.16	MUC1	56.929	0.162	85.313	6.214	1.05	7.124	1.0e-12	3.8e-11
ENSG00000220842.6	RPL21P16	48.809	0	73.213	6.214	5.948	3.467	5.3e-4	0.004
ENSG00000213864.3	EEF1B2P2	48.771	0	73.157	6.213	2.339	4.32	1.6e-5	1.7e-4
ENSG00000103187.7	COTL1	154.195	2.153	230.216	6.196	0.573	9.747	1.9e-22	1.6e-20
ENSG00000251630.1	AC119751.6	48.137	0	72.206	6.194	2.999	2.026	0.043	0.155
ENSG00000121089.4	NACA3P	72.987	0.511	109.225	6.188	1.317	4.957	7.1e-7	1.0e-5
ENSG00000026508.18	CD44	325.669	5.702	485.653	6.182	0.536	12.081	1.3e-33	2.0e-31
ENSG00000166825.13	ANPEP	68.372	0.444	102.335	6.161	0.885	7.596	3.0e-14	1.3e-12
ENSG00000242683.1	RPL12P21	109.92	1.318	164.222	6.156	1.351	4.288	1.8e-5	1.9e-4
ENSG00000103044.10	HAS3	52.761	0.124	79.079	6.154	0.763	10.149	3.3e-24	3.2e-22
ENSG00000284964.1	AC242842.2	46.518	0	69.777	6.145	3.141	1.793	0.073	0.235
ENSG00000139211.6	AMIGO2	64.928	0.394	97.194	6.138	0.724	9.057	1.3e-19	9.3e-18
ENSG00000144063.3	MALL	124.878	1.686	186.474	6.125	0.755	6.986	2.8e-12	9.7e-11
ENSG00000112299.7	VNN1	49.655	0.087	74.439	6.117	0.901	9.301	1.4e-20	1.0e-18
ENSG00000186007.9	LEMD1	45.037	0	67.556	6.099	2.19	4.331	1.5e-5	1.6e-4
ENSG00000269378.1	ITGB1P1	77.139	0.703	115.358	6.094	1.039	5.719	1.1e-8	2.2e-7
ENSG00000285417.1	BX571818.1	160.286	2.522	239.168	6.091	0.751	7.313	2.6e-13	1.0e-11
ENSG00000168542.14	COL3A1	398.896	7.741	594.474	6.09	1.105	3.376	7.4e-4	0.005
ENSG00000175063.16	UBE2C	116.35	1.574	173.738	6.085	0.71	7.968	1.6e-15	7.7e-14
ENSG00000167644.11	C19orf33	325.998	6.195	485.9	6.08	0.674	7.337	2.2e-13	8.4e-12
ENSG00000015285.10	WAS	66.365	0.484	99.306	6.079	1.361	2.802	0.005	0.027
ENSG00000188042.7	ARL4C	51.096	0.148	76.57	6.079	0.717	10.588	3.4e-26	3.6e-24
ENSG00000019991.16	HGF	55.756	0.254	83.507	6.075	0.673	10.083	6.6e-24	6.1e-22
ENSG00000285334.1	AC073264.5	60.365	0.359	90.368	6.071	1.56	4.227	2.4e-5	2.5e-4
ENSG00000229638.1	RPL4P4	46.814	0.065	70.189	6.063	1.765	5.073	3.9e-7	6.0e-6
ENSG00000150551.10	LYPD1	50.544	0.153	75.74	6.057	0.929	7.936	2.1e-15	9.8e-14
ENSG00000241562.2	RPL7P5	49.668	0.137	74.434	6.052	1.835	4.303	1.7e-5	1.8e-4
ENSG00000185101.12	ANO9	45.653	0.047	68.456	6.051	1.137	6.979	3.0e-12	1.0e-10
ENSG00000258608.1	DNAJC19P9	43.023	0	64.534	6.034	2.599	3.051	0.002	0.014
ENSG00000125730.16	C3	1051.08	22.98	1565.12	6.029	0.522	10.149	3.3e-24	3.2e-22
ENSG00000167553.15	TUBA1C	509.197	10.641	758.475	6.028	0.528	8.849	8.9e-19	5.7e-17
ENSG00000168743.12	NPNT	159.392	2.678	237.749	6.02	0.838	6.236	4.5e-10	1.1e-8
ENSG00000123416.15	TUBA1B	1335.27	29.865	1987.97	6.01	0.516	9.137	6.4e-20	4.6e-18
ENSG00000166598.14	HSP90B1	1172.81	26.229	1746.1	6.004	0.527	7.381	1.6e-13	6.2e-12
ENSG00000135318.11	NT5E	68.021	0.607	101.728	5.999	0.608	10.596	3.1e-26	3.3e-24
ENSG00000223639.6	CLIC1	329.591	6.715	491.029	5.995	0.54	8.953	3.5e-19	2.3e-17
ENSG00000120068.6	HOXB8	42.559	0.04	63.818	5.962	1.582	5.576	2.5e-8	4.7e-7
ENSG00000029153.14	ARNTL2	42.845	0.049	64.243	5.959	0.848	9.784	1.3e-22	1.1e-20
ENSG00000136295.14	TTYH3	62.138	0.511	92.952	5.959	0.612	9.577	1.0e-21	7.9e-20
ENSG00000155465.18	SLC7A7	81.758	0.983	122.146	5.957	0.676	9.78	1.4e-22	1.2e-20
ENSG00000136883.14	KIF12	40.388	0	60.581	5.944	2.196	5.156	2.5e-7	4.1e-6
ENSG00000283149.1	AC068631.2	40.068	0	60.102	5.933	2.328	3.843	1.2e-4	0.001
ENSG00000218582.2	GAPDHP63	68.575	0.696	102.515	5.931	1.226	4.934	8.0e-7	1.2e-5
ENSG00000152128.13	TMEM163	41.506	0.038	62.239	5.929	1.557	6.053	1.4e-9	3.3e-8
ENSG00000129354.11	AP1M2	39.883	0	59.824	5.927	2.165	4.596	4.3e-6	5.3e-5
ENSG00000250703.1	AC113347.3	39.521	0	59.282	5.914	4.064	1.353	0.176	0.451
ENSG00000213553.4	RPLP0P6	39.307	0	58.96	5.906	2.321	4.553	5.3e-6	6.4e-5
ENSG00000163191.5	S100A11	915.709	21.838	1362.64	5.9	0.553	8.273	1.3e-16	7.0e-15
ENSG00000117399.13	CDC20	42.393	0.088	63.545	5.89	1.181	6.701	2.1e-11	6.3e-10
ENSG00000254328.1	AC008429.4	38.67	0	58.004	5.883	3.165	1.799	0.072	0.233
ENSG00000231313.2	CLIC1P1	38.657	0	57.986	5.882	2.321	4.276	1.9e-5	2.0e-4
ENSG00000224524.1	CYCSP42	38.609	0	57.914	5.881	2.931	2.21	0.027	0.108
ENSG00000106366.8	SERPINE1	70.057	0.801	104.685	5.875	0.762	7.563	3.9e-14	1.6e-12
ENSG00000196878.14	LAMB3	99.019	1.546	147.756	5.869	0.634	8.968	3.0e-19	2.0e-17
ENSG00000138119.16	MYOF	82.863	1.136	123.727	5.868	0.628	8.312	9.4e-17	5.1e-15
ENSG00000251285.2	AC097484.2	92.649	1.397	138.276	5.861	2.078	2.62	0.009	0.043
ENSG00000141934.9	PLPP2	43.167	0.135	64.683	5.855	0.759	6.588	4.4e-11	1.3e-9
ENSG00000164251.4	F2RL1	37.853	0	56.779	5.852	2.119	5.825	5.7e-9	1.2e-7
ENSG00000168679.17	SLC16A4	61.08	0.603	91.319	5.848	0.77	7.573	3.7e-14	1.5e-12
ENSG00000236533.1	AC009413.1	37.71	0	56.565	5.847	2.456	3.315	9.2e-4	0.006
ENSG00000214269.3	LGMNP1	37.505	0	56.257	5.839	2.245	4.932	8.1e-7	1.2e-5
ENSG00000097021.19	ACOT7	69.482	0.846	103.799	5.827	0.667	8.552	1.2e-17	7.1e-16
ENSG00000172137.18	CALB2	37.084	0	55.626	5.823	2.135	5.131	2.9e-7	4.6e-6
ENSG00000278275.1	AC103705.1	36.978	0	55.468	5.819	2.781	2.273	0.023	0.095
ENSG00000233839.1	AL357055.1	36.639	0	54.959	5.806	2.493	3.295	9.8e-4	0.007
ENSG00000230384.1	RPSAP25	38.552	0.052	57.803	5.805	4.75	2.195	0.028	0.111
ENSG00000163362.10	INAVA	38.766	0.064	58.117	5.796	1.16	7.858	3.9e-15	1.8e-13
ENSG00000173267.13	SNCG	308.075	7.277	458.474	5.795	0.653	7.075	1.5e-12	5.3e-11
ENSG00000139117.13	CPNE8	88.503	1.413	132.048	5.785	0.634	7.343	2.1e-13	8.1e-12
ENSG00000275046.1	AL603755.1	36.091	0	54.137	5.785	3.383	1.592	0.111	0.324
ENSG00000110492.15	MDK	96.86	1.653	144.463	5.777	1.042	5.035	4.8e-7	7.2e-6
ENSG00000115828.15	QPCT	51.933	0.435	77.682	5.777	0.822	8.099	5.5e-16	2.8e-14
ENSG00000244073.1	RPS4XP6	41.565	0.157	62.269	5.773	1.789	4.362	1.3e-5	1.4e-4
ENSG00000091136.13	LAMB1	167.533	3.591	249.505	5.77	0.844	4.345	1.4e-5	1.5e-4
ENSG00000113140.10	SPARC	3450.53	93.223	5129.19	5.767	0.652	1.879	0.06	0.204
ENSG00000174939.10	ASPHD1	39.947	0.127	59.857	5.755	1.059	6.516	7.2e-11	2.0e-9
ENSG00000264971.1	PRR13P4	35.272	0	52.908	5.752	2.444	3.366	7.6e-4	0.005
ENSG00000238231.2	AL512288.2	35.227	0	52.84	5.751	2.744	2.85	0.004	0.024
ENSG00000213061.2	PFN1P11	34.855	0	52.282	5.736	2.488	3.192	0.001	0.009
ENSG00000135373.12	EHF	35.502	0.027	53.239	5.722	1.604	5.945	2.8e-9	6.2e-8
ENSG00000149557.12	FEZ1	125.377	2.575	186.779	5.715	0.606	8.767	1.8e-18	1.1e-16
ENSG00000219986.2	BTF3P7	34.305	0	51.457	5.713	2.419	3.586	3.4e-4	0.003
ENSG00000223668.1	EEF1A1P24	34.132	0	51.198	5.706	2.308	4.799	1.6e-6	2.2e-5
ENSG00000089820.15	ARHGAP4	69.283	1.001	103.424	5.706	0.632	7.855	4.0e-15	1.8e-13
ENSG00000235685.2	AC092473.1	34.092	0	51.138	5.704	3.111	1.958	0.05	0.176
ENSG00000171729.13	TMEM51	51.197	0.491	76.55	5.701	0.722	8.139	4.0e-16	2.0e-14
ENSG00000197582.5	GPX1P1	68.239	0.979	101.869	5.7	1.221	4.517	6.3e-6	7.4e-5
ENSG00000186340.14	THBS2	43.579	0.277	65.23	5.697	0.977	3.657	2.5e-4	0.002
ENSG00000171951.4	SCG2	33.887	0	50.831	5.696	2.133	5.588	2.3e-8	4.5e-7
ENSG00000170312.15	CDK1	45.22	0.33	67.665	5.69	0.936	7.753	9.0e-15	4.0e-13
ENSG00000229132.2	EIF4A1P10	33.699	0	50.549	5.688	2.313	4.681	2.9e-6	3.7e-5
ENSG00000166145.14	SPINT1	40.399	0.197	60.5	5.683	1.169	7.165	7.8e-13	2.8e-11
ENSG00000101198.14	NKAIN4	33.502	0	50.252	5.68	2.377	3.99	6.6e-5	6.1e-4
ENSG00000135451.12	TROAP	33.453	0	50.18	5.678	2.141	4.98	6.4e-7	9.4e-6
ENSG00000253981.5	ALG1L13P	33.295	0	49.943	5.671	2.227	3.991	6.6e-5	6.1e-4
ENSG00000197903.7	HIST1H2BK	33.228	0	49.843	5.668	2.399	3.171	0.002	0.01
ENSG00000231965.4	AF131215.1	32.99	0	49.486	5.658	2.433	3.626	2.9e-4	0.002
ENSG00000111206.12	FOXM1	37.818	0.146	56.654	5.653	1.164	7.617	2.6e-14	1.1e-12
ENSG00000120254.15	MTHFD1L	36.404	0.107	54.552	5.65	0.859	8.463	2.6e-17	1.5e-15
ENSG00000086300.15	SNX10	41.847	0.268	62.636	5.649	0.832	8.565	1.1e-17	6.3e-16
ENSG00000225185.3	PPIAP8	32.719	0	49.078	5.646	2.415	3.572	3.5e-4	0.003
ENSG00000100162.14	CENPM	44.561	0.351	66.666	5.646	1.228	5.658	1.5e-8	3.1e-7
ENSG00000115414.18	FN1	358.947	9.682	533.58	5.645	0.875	1.989	0.047	0.166
ENSG00000026025.15	VIM	2337.78	68.502	3472.43	5.643	0.513	8.477	2.3e-17	1.3e-15
ENSG00000142949.16	PTPRF	77.103	1.325	114.992	5.641	0.571	10.57	4.1e-26	4.3e-24
ENSG00000151746.13	BICD1	60.072	0.821	89.697	5.638	0.591	6.894	5.4e-12	1.8e-10
ENSG00000203462.2	AC093392.1	32.297	0	48.446	5.628	2.788	2.663	0.008	0.039
ENSG00000137880.5	GCHFR	57.292	0.753	85.562	5.626	0.878	6.211	5.3e-10	1.3e-8
ENSG00000185686.17	PRAME	33.325	0.035	49.97	5.623	1.561	5.94	2.9e-9	6.3e-8
ENSG00000241838.3	AP000529.1	55.749	0.711	83.269	5.622	0.941	5.919	3.2e-9	7.1e-8
ENSG00000116741.7	RGS2	101.637	2.115	151.397	5.612	0.893	5.4	6.6e-8	1.2e-6
ENSG00000105290.11	APLP1	43.858	0.365	65.604	5.609	0.9	6.712	1.9e-11	5.9e-10
ENSG00000217555.12	CKLF	183.628	4.622	273.131	5.608	0.675	6.932	4.1e-12	1.4e-10
ENSG00000214263.2	RPSAP53	31.786	0	47.679	5.605	2.36	4.261	2.0e-5	2.1e-4
ENSG00000162511.7	LAPTM5	77.248	1.392	115.176	5.602	0.609	7.484	7.2e-14	2.9e-12
ENSG00000128340.14	RAC2	60.525	0.884	90.345	5.6	1.139	2.841	0.004	0.025
ENSG00000277669.1	AC009086.2	35.864	0.138	53.727	5.588	1.751	3.813	1.4e-4	0.001
ENSG00000180867.10	PDIA3P1	49.878	0.571	74.531	5.587	1.092	5.378	7.5e-8	1.3e-6
ENSG00000131910.4	NR0B2	40.301	0.282	60.31	5.579	1.002	6.309	2.8e-10	7.3e-9
ENSG00000103534.16	TMC5	33.051	0.058	49.547	5.578	1.009	7.885	3.1e-15	1.4e-13
ENSG00000225639.1	PGAM1P2	31.115	0	46.672	5.575	2.368	4.066	4.8e-5	4.6e-4
ENSG00000175886.10	RPL7AP66	30.975	0	46.462	5.569	2.398	4.114	3.9e-5	3.8e-4
ENSG00000242529.1	AHCYP8	30.958	0	46.437	5.568	3.155	1.821	0.069	0.225
ENSG00000166394.14	CYB5R2	71.17	1.261	106.124	5.566	0.728	5.241	1.6e-7	2.7e-6
ENSG00000175130.6	MARCKSL1	101.393	2.213	150.984	5.564	0.775	6.229	4.7e-10	1.2e-8
ENSG00000263563.5	AC138761.1	51.583	0.651	77.05	5.563	1.327	4.125	3.7e-5	3.7e-4
ENSG00000184012.11	TMPRSS2	38.412	0.241	57.497	5.558	0.835	8.763	1.9e-18	1.2e-16
ENSG00000230364.1	RPL4P3	32.591	0.06	48.856	5.556	1.795	4.722	2.3e-6	3.1e-5
ENSG00000076944.15	STXBP2	63.872	1.058	95.278	5.548	0.82	7.207	5.7e-13	2.1e-11
ENSG00000186008.7	RPS4XP21	30.369	0	45.553	5.541	2.357	4.102	4.1e-5	4.0e-4
ENSG00000130635.15	COL5A1	75.728	1.456	112.864	5.535	1.06	3.213	0.001	0.008
ENSG00000166851.14	PLK1	38.098	0.252	57.02	5.534	0.753	8.165	3.2e-16	1.6e-14
ENSG00000234685.1	NUS1P2	33.416	0.105	50.071	5.531	1.622	4.624	3.8e-6	4.7e-5
ENSG00000011422.11	PLAUR	88.311	1.884	131.525	5.522	0.656	8.788	1.5e-18	9.6e-17
ENSG00000226539.1	AC012512.1	33.896	0.143	50.772	5.502	1.631	4.367	1.3e-5	1.4e-4
ENSG00000242071.3	RPL7AP6	33.602	0.134	50.336	5.5	1.809	4.152	3.3e-5	3.3e-4
ENSG00000243256.1	RPL30P14	49.461	0.654	73.865	5.5	2.02	2.787	0.005	0.028
ENSG00000166681.13	BEX3	234.714	6.734	348.704	5.499	0.688	6.198	5.7e-10	1.4e-8
ENSG00000057019.15	DCBLD2	94.243	2.135	140.296	5.494	0.569	7.988	1.4e-15	6.6e-14
ENSG00000142634.12	EFHD2	61.543	1.062	91.783	5.491	0.596	8.505	1.8e-17	1.0e-15
ENSG00000253680.1	AC093331.1	29.256	0	43.884	5.488	3.697	1.401	0.161	0.424
ENSG00000124140.13	SLC12A5	43.121	0.465	64.448	5.481	1.782	3.452	5.6e-4	0.004
ENSG00000241253.8	CFB	40.144	0.377	60.027	5.469	1.219	5.043	4.6e-7	7.0e-6
ENSG00000214925.3	AC234778.1	28.753	0	43.129	5.464	2.657	2.832	0.005	0.025
ENSG00000285283.1	AL035078.4	28.533	0	42.8	5.453	4.672	1.862	0.063	0.21
ENSG00000119969.14	HELLS	30.568	0.077	45.813	5.441	0.878	8.424	3.6e-17	2.0e-15
ENSG00000243449.6	C4orf48	39.294	0.389	58.746	5.426	1.757	3.37	7.5e-4	0.005
ENSG00000164761.8	TNFRSF11B	33.953	0.219	50.82	5.41	0.974	6.722	1.8e-11	5.5e-10
ENSG00000242208.1	RPL5P29	30.291	0.101	45.386	5.396	1.834	4.15	3.3e-5	3.3e-4
ENSG00000137251.15	TINAG	29.779	0.084	44.626	5.396	1.254	5.276	1.3e-7	2.3e-6
ENSG00000214199.3	EEF1A1P12	37.694	0.363	56.36	5.395	1.143	5.362	8.2e-8	1.4e-6
ENSG00000172725.13	CORO1B	113.463	3.036	168.677	5.394	0.565	6.228	4.7e-10	1.2e-8
ENSG00000005022.5	SLC25A5	343.89	11.185	510.242	5.391	0.537	7.805	5.9e-15	2.7e-13
ENSG00000099194.5	SCD	32.756	0.205	49.032	5.376	0.643	10.139	3.7e-24	3.6e-22
ENSG00000099377.13	HSD3B7	52.864	0.924	78.834	5.375	0.651	8.363	6.1e-17	3.3e-15
ENSG00000113083.13	LOX	35.166	0.292	52.604	5.374	1.111	4.044	5.3e-5	5.0e-4
ENSG00000117632.22	STMN1	197.645	6.135	293.401	5.367	0.565	6.972	3.1e-12	1.1e-10
ENSG00000120708.16	TGFBI	228.725	7.254	339.461	5.366	0.95	1.448	0.148	0.399
ENSG00000259674.1	AC092868.1	30.02	0.119	44.97	5.36	1.688	4.214	2.5e-5	2.6e-4
ENSG00000135269.17	TES	81.162	1.966	120.76	5.36	0.648	7.078	1.5e-12	5.2e-11
ENSG00000244731.7	C4A	79.7	1.914	118.593	5.359	1.118	4.149	3.3e-5	3.3e-4
ENSG00000134057.14	CCNB1	61.091	1.243	91.015	5.358	0.66	7.886	3.1e-15	1.4e-13
ENSG00000185567.6	AHNAK2	35.403	0.316	52.947	5.357	0.645	8.046	8.6e-16	4.2e-14
ENSG00000026297.15	RNASET2	74.425	1.733	110.771	5.354	0.725	6.577	4.8e-11	1.4e-9
ENSG00000163898.9	LIPH	33.64	0.261	50.329	5.347	1.109	7.632	2.3e-14	9.8e-13
ENSG00000235847.2	LDHAP7	26.462	0	39.693	5.347	2.366	4.239	2.2e-5	2.3e-4
ENSG00000275736.4	OSCAR	26.453	0	39.68	5.346	2.157	5.082	3.7e-7	5.8e-6
ENSG00000153406.13	NMRAL1	63.175	1.345	94.09	5.342	0.724	6.804	1.0e-11	3.3e-10
ENSG00000166794.4	PPIB	400.641	13.687	594.118	5.341	0.605	6.459	1.1e-10	2.9e-9
ENSG00000166130.14	IKBIP	55.132	1.057	82.17	5.337	0.61	8.315	9.2e-17	4.9e-15
ENSG00000241250.1	RPL17P20	26.144	0	39.216	5.33	2.417	3.584	3.4e-4	0.003
ENSG00000275895.6	U2AF1L5	56.537	1.131	84.239	5.322	0.792	5.073	3.9e-7	6.0e-6
ENSG00000249992.1	TMEM158	34.523	0.321	51.623	5.316	0.927	6.542	6.1e-11	1.7e-9
ENSG00000163359.15	COL6A3	127.096	3.772	188.757	5.313	1.015	-0.485	0.628	0.953
ENSG00000284947.1	AC275401.1	25.842	0	38.763	5.313	3.703	1.29	0.197	0.489
ENSG00000089685.14	BIRC5	26.536	0.028	39.79	5.31	1.557	5.802	6.5e-9	1.4e-7
ENSG00000050344.8	NFE2L3	55.561	1.12	82.781	5.305	0.72	6.743	1.6e-11	4.9e-10
ENSG00000181085.14	MAPK15	25.626	0	38.438	5.302	2.174	4.499	6.8e-6	8.0e-5
ENSG00000145247.11	OCIAD2	121.244	3.623	180.055	5.292	0.63	6.443	1.2e-10	3.2e-9
ENSG00000111799.20	COL12A1	58.777	1.264	87.533	5.289	1.067	3.791	1.5e-4	0.001
ENSG00000141756.18	FKBP10	78.279	2.012	116.412	5.285	0.586	7.781	7.2e-15	3.2e-13
ENSG00000197575.6	RPS17P2	25.308	0	37.962	5.284	2.68	2.873	0.004	0.023
ENSG00000206314.9	GPSM3	36.976	0.445	55.241	5.282	0.802	6.917	4.6e-12	1.5e-10
ENSG00000140297.12	GCNT3	29.419	0.159	44.049	5.28	0.728	7.355	1.9e-13	7.4e-12
ENSG00000113924.11	HGD	25.186	0	37.778	5.277	2.182	4.755	2.0e-6	2.6e-5
ENSG00000125657.4	TNFSF9	41.361	0.622	61.73	5.273	0.708	7.416	1.2e-13	4.8e-12
ENSG00000230596.3	GPAA1P2	28.28	0.128	42.355	5.265	1.64	4.9	9.6e-7	1.4e-5
ENSG00000166888.11	STAT6	163.104	5.322	241.995	5.264	0.547	7.013	2.3e-12	8.1e-11
ENSG00000074800.14	ENO1	1410.73	53.393	2089.4	5.264	0.512	7.961	1.7e-15	8.1e-14
ENSG00000236857.3	RAP1BP1	24.93	0	37.395	5.263	2.356	3.625	2.9e-4	0.002
ENSG00000113645.14	WWC1	25.332	0.018	37.989	5.259	1.175	7.07	1.6e-12	5.5e-11
ENSG00000213867.4	AL049830.1	35.372	0.406	52.855	5.259	2.042	2.864	0.004	0.023
ENSG00000169436.16	COL22A1	39.112	0.557	58.39	5.253	0.637	8.003	1.2e-15	5.9e-14
ENSG00000172183.14	ISG20	34.696	0.391	51.849	5.248	0.847	5.708	1.1e-8	2.3e-7
ENSG00000237433.1	RPSAP11	26.167	0.06	39.22	5.245	1.867	3.952	7.8e-5	7.1e-4
ENSG00000275410.4	HNF1B	24.793	0.01	37.185	5.241	2.148	5.411	6.3e-8	1.1e-6
ENSG00000005001.9	PRSS22	24.521	0	36.782	5.24	2.216	4.068	4.7e-5	4.6e-4
ENSG00000130775.15	THEMIS2	31.794	0.289	47.546	5.235	0.819	7.605	2.8e-14	1.2e-12
ENSG00000243746.1	EEF1A1P10	29.092	0.184	43.547	5.234	1.297	5.253	1.5e-7	2.5e-6
ENSG00000117724.12	CENPF	32.014	0.301	47.871	5.232	0.766	8.001	1.2e-15	6.0e-14
ENSG00000100596.6	SPTLC2	56.534	1.267	84.168	5.232	0.662	2.877	0.004	0.022
ENSG00000075891.21	PAX2	24.355	0	36.533	5.23	2.191	5.104	3.3e-7	5.2e-6
ENSG00000272901.5	SMDT1	167.178	5.637	247.948	5.229	1.465	2.911	0.004	0.02
ENSG00000163131.10	CTSS	82.4	2.303	122.449	5.224	0.666	5.522	3.3e-8	6.3e-7
ENSG00000122952.16	ZWINT	32.501	0.328	48.588	5.222	0.952	6.979	3.0e-12	1.0e-10
ENSG00000095932.6	SMIM24	24.17	0	36.255	5.219	2.316	3.926	8.6e-5	7.8e-4
ENSG00000119632.3	IFI27L2	84.877	2.416	126.108	5.218	0.851	5.153	2.6e-7	4.1e-6
ENSG00000235282.3	DYNLL1P3	24.088	0	36.132	5.215	3.077	1.993	0.046	0.165
ENSG00000099812.8	MISP	24.075	0	36.112	5.214	2.166	5.334	9.6e-8	1.7e-6
ENSG00000236280.1	AC114737.2	24.031	0	36.047	5.211	3.703	1.326	0.185	0.468
ENSG00000173207.12	CKS1B	129.447	4.226	192.057	5.207	0.625	6.76	1.4e-11	4.4e-10
ENSG00000178999.12	AURKB	41.348	0.698	61.673	5.206	0.783	5.969	2.4e-9	5.4e-8
ENSG00000117472.9	TSPAN1	34.589	0.431	51.668	5.202	1.018	5.929	3.1e-9	6.8e-8
ENSG00000254618.1	TMED10P1	23.683	0	35.525	5.191	2.378	3.769	1.6e-4	0.001
ENSG00000158089.14	GALNT14	29.014	0.221	43.411	5.185	1.204	6.397	1.6e-10	4.2e-9
ENSG00000131747.14	TOP2A	23.562	0	35.343	5.184	2.12	5.744	9.3e-9	1.9e-7
ENSG00000244097.1	RPS4XP17	23.536	0	35.304	5.182	2.389	3.899	9.6e-5	8.7e-4
ENSG00000167461.11	RAB8A	85.059	2.508	126.334	5.182	0.616	4.934	8.1e-7	1.2e-5
ENSG00000076604.14	TRAF4	32.316	0.359	48.295	5.181	0.78	6.387	1.7e-10	4.5e-9
ENSG00000162704.15	ARPC5	128.143	4.271	190.08	5.18	0.546	6.228	4.7e-10	1.2e-8
ENSG00000101057.15	MYBL2	23.39	0	35.086	5.173	2.126	5.396	6.8e-8	1.2e-6
ENSG00000240083.2	RPS3AP22	23.302	0	34.953	5.168	2.408	3.885	1.0e-4	9.1e-4
ENSG00000204531.17	POU5F1	30.827	0.315	46.083	5.162	0.869	5.939	2.9e-9	6.4e-8
ENSG00000213026.4	CFL1P4	29.923	0.286	44.741	5.152	1.918	3.172	0.002	0.01
ENSG00000236667.1	AC104076.2	23.015	0	34.523	5.151	2.52	3.166	0.002	0.01
ENSG00000120889.12	TNFRSF10B	82.417	2.479	122.386	5.148	0.54	7.282	3.3e-13	1.2e-11
ENSG00000283977.1	AC084337.2	22.907	0	34.361	5.144	2.56	3.401	6.7e-4	0.005
ENSG00000034510.5	TMSB10	5836.27	243.665	8632.58	5.141	0.559	6.844	7.7e-12	2.5e-10
ENSG00000101197.12	BIRC7	24.288	0.06	36.402	5.14	2.025	3.753	1.7e-4	0.001
ENSG00000178531.5	CTXN1	22.836	0	34.253	5.14	2.172	4.667	3.1e-6	3.9e-5
ENSG00000197283.16	SYNGAP1	24.649	0.077	36.935	5.138	1.08	4.493	7.0e-6	8.2e-5
ENSG00000128573.24	FOXP2	74.535	2.177	110.714	5.136	1.08	-1.505	0.132	0.368
ENSG00000136250.11	AOAH	33.29	0.445	49.713	5.133	1.007	5.773	7.8e-9	1.6e-7
ENSG00000145050.15	MANF	104.05	3.43	154.359	5.132	0.785	4.497	6.9e-6	8.1e-5
ENSG00000082196.20	C1QTNF3	44.685	0.928	66.563	5.131	0.896	2.336	0.019	0.083
ENSG00000075618.17	FSCN1	55.166	1.376	82.06	5.127	0.601	6.973	3.1e-12	1.1e-10
ENSG00000168487.17	BMP1	78.288	2.384	116.24	5.115	0.922	3.605	3.1e-4	0.002
ENSG00000106624.10	AEBP1	108.38	3.67	160.735	5.114	1.142	2.509	0.012	0.056
ENSG00000177106.14	EPS8L2	34.64	0.523	51.698	5.112	0.84	7.9	2.8e-15	1.3e-13
ENSG00000111319.12	SCNN1A	46.547	1.036	69.302	5.11	0.982	7.71	1.3e-14	5.5e-13
ENSG00000120756.12	PLS1	31.895	0.408	47.639	5.11	0.719	8.234	1.8e-16	9.5e-15
ENSG00000011426.10	ANLN	31.486	0.394	47.031	5.106	0.927	8.499	1.9e-17	1.1e-15
ENSG00000083857.13	FAT1	50	1.2	74.4	5.099	0.596	5.835	5.4e-9	1.1e-7
ENSG00000108679.12	LGALS3BP	152.317	5.615	225.669	5.099	0.627	6.278	3.4e-10	8.8e-9
ENSG00000139289.13	PHLDA1	56.96	1.501	84.689	5.098	0.543	8.198	2.5e-16	1.3e-14
ENSG00000146038.11	DCDC2	24.225	0.09	36.293	5.096	0.946	7.956	1.8e-15	8.5e-14
ENSG00000112303.13	VNN2	25.496	0.146	38.171	5.094	1.208	5.942	2.8e-9	6.3e-8
ENSG00000264179.1	AP000894.1	22.043	0	33.064	5.09	2.486	3.312	9.3e-4	0.006
ENSG00000228981.3	AC097658.1	24.546	0.111	36.763	5.087	1.808	3.961	7.5e-5	6.8e-4
ENSG00000142227.10	EMP3	274.703	10.994	406.557	5.087	0.563	6.554	5.6e-11	1.6e-9
ENSG00000196924.15	FLNA	541.989	22.647	801.66	5.085	0.591	4.997	5.8e-7	8.7e-6
ENSG00000109113.19	RAB34	121.699	4.358	180.37	5.081	0.577	7.314	2.6e-13	9.9e-12
ENSG00000013588.7	GPRC5A	23.387	0.066	35.047	5.08	0.754	9.603	7.8e-22	6.2e-20
ENSG00000214944.9	ARHGEF28	25.925	0.177	38.799	5.08	0.672	8.121	4.6e-16	2.3e-14
ENSG00000236271.8	FLOT1	87.689	2.896	130.086	5.072	0.768	3.628	2.9e-4	0.002
ENSG00000217239.3	AL136968.2	21.723	0	32.584	5.07	2.733	2.542	0.011	0.052
ENSG00000235587.2	GAPDHP65	30.77	0.399	45.956	5.069	1.326	4.195	2.7e-5	2.8e-4
ENSG00000205542.10	TMSB4X	7110.97	312.207	10510.4	5.069	0.514	7.184	6.7e-13	2.5e-11
ENSG00000228337.1	PPIAP69	21.52	0	32.281	5.057	3.198	1.758	0.079	0.25
ENSG00000122861.15	PLAU	123.114	4.512	182.415	5.056	0.636	6.055	1.4e-9	3.3e-8
ENSG00000138180.15	CEP55	22.044	0.026	33.053	5.053	1.563	5.706	1.2e-8	2.3e-7
ENSG00000255519.1	AC103855.4	21.412	0	32.118	5.05	3.036	1.935	0.053	0.184
ENSG00000206452.10	HLA-C	38.662	0.771	57.608	5.049	0.745	6.916	4.6e-12	1.5e-10
ENSG00000166557.12	TMED3	38.656	0.779	57.594	5.042	0.699	6.904	5.1e-12	1.7e-10
ENSG00000181649.6	PHLDA2	40.898	0.88	60.906	5.041	0.884	5.406	6.4e-8	1.2e-6
ENSG00000011028.13	MRC2	55.005	1.514	81.751	5.041	0.869	1.142	0.254	0.582
ENSG00000099849.14	RASSF7	23.538	0.102	35.256	5.04	1.315	5.333	9.6e-8	1.7e-6
ENSG00000171848.14	RRM2	24.009	0.123	35.952	5.04	0.834	7.821	5.2e-15	2.4e-13
ENSG00000154269.14	ENPP3	22.018	0.039	33.008	5.032	1.24	6.546	5.9e-11	1.7e-9
ENSG00000188157.14	AGRN	47.969	1.216	71.345	5.029	0.568	6.754	1.4e-11	4.5e-10
ENSG00000281991.1	TMEM265	28.569	0.341	42.683	5.026	1.027	5.474	4.4e-8	8.2e-7
ENSG00000105855.9	ITGB8	22.51	0.068	33.731	5.024	0.843	8.742	2.3e-18	1.4e-16
ENSG00000136231.13	IGF2BP3	22.863	0.088	34.251	5.017	1.035	7.623	2.5e-14	1.0e-12
ENSG00000101104.12	PABPC1L	29.53	0.394	44.098	5.015	0.832	6.673	2.5e-11	7.5e-10
ENSG00000164825.3	DEFB1	20.834	0	31.25	5.011	2.564	3.083	0.002	0.012
ENSG00000104177.17	MYEF2	31.389	0.487	46.84	5.008	0.676	7.868	3.6e-15	1.6e-13
ENSG00000270236.1	AL162730.1	20.782	0	31.173	5.008	2.971	2.084	0.037	0.139
ENSG00000103490.13	PYCARD	40.421	0.911	60.176	5.001	0.906	5.003	5.6e-7	8.4e-6
ENSG00000128342.4	LIF	21.371	0.033	32.04	4.999	1.191	6.969	3.2e-12	1.1e-10
ENSG00000249253.1	AC093004.1	20.594	0	30.891	4.995	2.583	2.895	0.004	0.021
ENSG00000137807.14	KIF23	20.53	0	30.795	4.991	2.136	5.149	2.6e-7	4.2e-6
ENSG00000274950.4	RPS9	51.792	1.46	76.958	4.986	0.796	5.894	3.8e-9	8.2e-8
ENSG00000087245.12	MMP2	135.297	5.362	200.264	4.983	1.083	1.974	0.048	0.171
ENSG00000101049.14	SGK2	20.405	0	30.608	4.982	2.186	4.78	1.8e-6	2.3e-5
ENSG00000101856.9	PGRMC1	59.774	1.848	88.737	4.978	0.644	6.483	9.0e-11	2.5e-9
ENSG00000177425.10	PAWR	49.913	1.395	74.172	4.972	0.586	7.14	9.3e-13	3.4e-11
ENSG00000176014.12	TUBB6	119.613	4.692	177.073	4.967	0.563	7.121	1.1e-12	3.8e-11
ENSG00000104549.11	SQLE	23.581	0.16	35.291	4.967	0.837	7.178	7.1e-13	2.6e-11
ENSG00000157399.14	ARSE	20.995	0.039	31.473	4.966	1.63	4.669	3.0e-6	3.8e-5
ENSG00000170545.16	SMAGP	72.222	2.466	107.1	4.963	0.655	6.113	9.8e-10	2.3e-8
ENSG00000033170.16	FUT8	72.008	2.461	106.782	4.961	0.587	6.97	3.2e-12	1.1e-10
ENSG00000255807.1	PTP4A1P2	19.917	0	29.875	4.948	2.533	3.019	0.003	0.015
ENSG00000139146.13	SINHCAF	44.506	1.185	66.167	4.942	0.61	7.488	7.0e-14	2.8e-12
ENSG00000164400.5	CSF2	19.8	0	29.701	4.94	2.418	3.793	1.5e-4	0.001
ENSG00000143753.12	DEGS1	175.012	7.468	258.784	4.939	0.654	5.383	7.3e-8	1.3e-6
ENSG00000110031.12	LPXN	42.966	1.117	63.89	4.938	0.656	6.308	2.8e-10	7.3e-9
ENSG00000140287.10	HDC	19.741	0	29.612	4.936	3.872	2.544	0.011	0.052
ENSG00000051523.10	CYBA	218.04	9.58	322.27	4.933	0.678	5.482	4.2e-8	7.8e-7
ENSG00000144136.10	SLC20A1	103.077	4.035	152.599	4.931	0.536	7.581	3.4e-14	1.4e-12
ENSG00000163121.9	NEURL3	20.717	0.052	31.05	4.929	1.594	4.909	9.2e-7	1.3e-5
ENSG00000215457.5	RPS8P3	19.633	0	29.449	4.928	2.468	3.477	5.1e-4	0.004
ENSG00000076554.15	TPD52	126.18	5.183	186.679	4.924	0.622	2.897	0.004	0.021
ENSG00000236281.1	NDUFB9P2	19.528	0	29.292	4.921	2.583	3.099	0.002	0.012
ENSG00000104312.7	RIPK2	46.063	1.296	68.447	4.919	0.634	7.843	4.4e-15	2.0e-13
ENSG00000136052.9	SLC41A2	28.973	0.463	43.229	4.918	0.772	8.22	2.0e-16	1.1e-14
ENSG00000176049.15	JAKMIP2	19.875	0.02	29.802	4.916	1.229	3.841	1.2e-4	0.001
ENSG00000241499.1	AL132838.2	36.646	0.843	54.547	4.914	2.23	2.172	0.03	0.116
ENSG00000138152.8	BTBD16	24.154	0.235	36.114	4.909	0.982	4.429	9.4e-6	1.1e-4
ENSG00000135446.16	CDK4	229.539	10.359	339.13	4.904	0.533	6.057	1.4e-9	3.2e-8
ENSG00000106258.14	CYP3A5	33.01	0.677	49.177	4.903	0.777	5.888	3.9e-9	8.5e-8
ENSG00000169903.6	TM4SF4	19.232	0	28.848	4.9	2.264	4.248	2.2e-5	2.3e-4
ENSG00000187164.19	SHTN1	20.523	0.064	30.752	4.899	0.931	7.969	1.6e-15	7.7e-14
ENSG00000124920.13	MYRF	19.853	0.031	29.765	4.899	1.341	6.433	1.3e-10	3.4e-9
ENSG00000196136.17	SERPINA3	126.363	5.304	186.893	4.898	0.69	5.654	1.6e-8	3.1e-7
ENSG00000278552.1	AC116165.3	19.152	0	28.728	4.894	2.675	2.688	0.007	0.036
ENSG00000131236.16	CAP1	246.161	11.265	363.61	4.894	0.531	5.747	9.1e-9	1.9e-7
ENSG00000169679.14	BUB1	19.949	0.041	29.903	4.892	1.184	6.728	1.7e-11	5.3e-10
ENSG00000005448.16	WDR54	33.969	0.739	50.585	4.891	0.943	5.853	4.8e-9	1.0e-7
ENSG00000242265.5	PEG10	40.983	1.088	60.931	4.891	0.706	4.955	7.2e-7	1.1e-5
ENSG00000161921.14	CXCL16	30.174	0.557	44.983	4.884	1.071	5.231	1.7e-7	2.8e-6
ENSG00000140968.10	IRF8	19.468	0.022	29.192	4.884	1.903	2.736	0.006	0.032
ENSG00000236973.2	GAPDHP51	19.011	0	28.517	4.883	2.346	4.096	4.2e-5	4.1e-4
ENSG00000146386.7	ABRACL	32.191	0.661	47.956	4.882	0.965	4.946	7.6e-7	1.1e-5
ENSG00000230196.1	DDX43P3	18.985	0	28.478	4.882	2.447	3.013	0.003	0.015
ENSG00000220343.5	PPIAP74	18.977	0	28.465	4.881	2.642	2.977	0.003	0.017
ENSG00000230391.1	RPSAP23	19.972	0.052	29.932	4.879	2.217	4.202	2.6e-5	2.7e-4
ENSG00000188596.10	CFAP54	23.737	0.244	35.483	4.874	0.777	6.861	6.8e-12	2.2e-10
ENSG00000197747.8	S100A10	476.089	23.131	702.568	4.866	0.541	6.601	4.1e-11	1.2e-9
ENSG00000058335.15	RASGRF1	18.767	0	28.151	4.865	2.148	5.377	7.6e-8	1.3e-6
ENSG00000105329.9	TGFB1	72.884	2.751	107.951	4.86	0.626	4.811	1.5e-6	2.0e-5
ENSG00000164265.8	SCGB3A2	71.65	2.694	106.128	4.858	1.263	2.708	0.007	0.035
ENSG00000261424.1	ATP5PBP7	18.647	0	27.97	4.856	2.384	3.769	1.6e-4	0.001
ENSG00000100033.16	PRODH	63.071	2.266	93.474	4.854	0.77	5.664	1.5e-8	3.0e-7
ENSG00000100557.9	CCDC198	19.023	0.022	28.523	4.852	1.67	4.314	1.6e-5	1.7e-4
ENSG00000175592.8	FOSL1	44.459	1.32	66.028	4.852	0.644	6.72	1.8e-11	5.6e-10
ENSG00000122786.19	CALD1	318.709	15.323	470.403	4.852	0.945	-1.399	0.162	0.425
ENSG00000149380.11	P4HA3	19.153	0.031	28.714	4.849	1.624	5.12	3.1e-7	4.8e-6
ENSG00000182481.8	KPNA2	71.701	2.731	106.186	4.844	0.568	6.778	1.2e-11	3.9e-10
ENSG00000224106.1	CYP4F25P	18.479	0	27.718	4.844	2.39	3.244	0.001	0.008
ENSG00000117676.13	RPS6KA1	27.12	0.446	40.458	4.842	0.763	6.871	6.4e-12	2.1e-10
ENSG00000106367.14	AP1S1	92.49	3.81	136.83	4.841	0.604	6.623	3.5e-11	1.0e-9
ENSG00000077150.18	NFKB2	82.822	3.324	122.571	4.837	0.574	6.709	2.0e-11	6.0e-10
ENSG00000167747.14	C19orf48	44.513	1.35	66.095	4.836	0.667	5.956	2.6e-9	5.8e-8
ENSG00000102317.17	RBM3	345.301	16.892	509.505	4.835	0.566	5.879	4.1e-9	8.9e-8
ENSG00000127564.16	PKMYT1	19.04	0.036	28.542	4.834	1.601	4.763	1.9e-6	2.5e-5
ENSG00000117448.13	AKR1A1	199.149	9.368	294.04	4.831	0.652	4.427	9.5e-6	1.1e-4
ENSG00000110092.3	CCND1	37.243	0.981	55.375	4.831	0.638	6.736	1.6e-11	5.1e-10
ENSG00000151474.21	FRMD4A	61.375	2.246	90.94	4.824	0.575	6.037	1.6e-9	3.6e-8
ENSG00000114115.9	RBP1	72.564	2.837	107.427	4.821	1.155	2.403	0.016	0.071
ENSG00000268105.1	AC124856.1	18.15	0	27.225	4.819	2.404	3.88	1.0e-4	9.3e-4
ENSG00000163734.4	CXCL3	33.954	0.827	50.518	4.818	1.175	4.031	5.6e-5	5.3e-4
ENSG00000163082.9	SGPP2	19.678	0.082	29.477	4.816	0.939	7.649	2.0e-14	8.6e-13
ENSG00000198088.10	NUP62CL	19.984	0.1	29.926	4.813	1.301	4.878	1.1e-6	1.5e-5
ENSG00000169129.14	AFAP1L2	43.608	1.34	64.743	4.813	0.569	7.796	6.4e-15	2.9e-13
ENSG00000107984.9	DKK1	18.804	0.041	28.186	4.81	1.837	3.921	8.8e-5	8.0e-4
ENSG00000188313.12	PLSCR1	217.531	10.486	321.054	4.809	0.619	6.074	1.2e-9	2.9e-8
ENSG00000105974.11	CAV1	684.69	35.045	1009.51	4.809	0.537	6.483	9.0e-11	2.5e-9
ENSG00000111775.2	COX6A1	561.024	28.577	827.247	4.808	0.553	6.332	2.4e-10	6.3e-9
ENSG00000218175.2	AC016739.1	44.134	1.381	65.511	4.804	1.825	2.428	0.015	0.067
ENSG00000105854.12	PON2	223.889	10.873	330.397	4.803	0.554	6.726	1.7e-11	5.4e-10
ENSG00000243649.8	CFB	24.64	0.356	36.783	4.801	1.102	5.631	1.8e-8	3.5e-7
ENSG00000101000.5	PROCR	61.474	2.314	91.054	4.796	0.756	5.576	2.5e-8	4.7e-7
ENSG00000160991.15	ORAI2	23.697	0.311	35.39	4.794	0.644	6.746	1.5e-11	4.8e-10
ENSG00000236698.1	EIF1AXP1	17.813	0	26.719	4.793	3.256	2.281	0.023	0.093
ENSG00000166840.13	GLYATL1	17.8	0	26.7	4.792	2.291	4.391	1.1e-5	1.3e-4
ENSG00000117394.21	SLC2A1	61.678	2.341	91.346	4.789	0.657	7.65	2.0e-14	8.6e-13
ENSG00000257907.2	EEF1A1P17	17.729	0	26.593	4.786	2.313	4.313	1.6e-5	1.7e-4
ENSG00000075213.10	SEMA3A	17.871	0.008	26.802	4.786	1.57	6.302	2.9e-10	7.6e-9
ENSG00000111145.7	ELK3	67.683	2.668	100.191	4.786	0.549	7.056	1.7e-12	6.0e-11
ENSG00000158769.17	F11R	51.099	1.793	75.751	4.78	0.553	6.87	6.4e-12	2.1e-10
ENSG00000077585.13	GPR137B	77.656	3.242	114.863	4.772	1.001	3.096	0.002	0.012
ENSG00000260027.4	HOXB7	36.326	1.018	53.98	4.768	0.74	5.164	2.4e-7	3.9e-6
ENSG00000149257.13	SERPINH1	195.592	9.631	288.573	4.768	0.545	6.463	1.0e-10	2.8e-9
ENSG00000105971.14	CAV2	239.15	11.988	352.731	4.767	0.622	5.967	2.4e-9	5.5e-8
ENSG00000224608.10	HLA-B	17.469	0	26.203	4.766	2.184	4.532	5.8e-6	7.0e-5
ENSG00000151239.13	TWF1	66.4	2.654	98.274	4.764	0.558	7.329	2.3e-13	8.9e-12
ENSG00000134824.13	FADS2	56.738	2.131	84.041	4.763	0.639	6.748	1.5e-11	4.7e-10
ENSG00000157456.7	CCNB2	22.063	0.253	32.968	4.761	0.882	6.195	5.8e-10	1.4e-8
ENSG00000167889.12	MGAT5B	18.181	0.045	27.249	4.757	1.632	5.298	1.2e-7	2.0e-6
ENSG00000179546.4	HTR1D	17.341	0	26.012	4.756	2.24	4.928	8.3e-7	1.2e-5
ENSG00000226970.2	AL450063.1	17.321	0	25.981	4.754	4.092	1.334	0.182	0.463
ENSG00000167306.19	MYO5B	18.656	0.074	27.946	4.752	0.805	6.364	2.0e-10	5.2e-9
ENSG00000110660.14	SLC35F2	20.411	0.171	30.532	4.752	0.88	7.628	2.4e-14	1.0e-12
ENSG00000237350.1	CDC42P6	17.287	0	25.93	4.751	2.443	3.337	8.5e-4	0.006
ENSG00000259461.1	ANP32BP3	17.266	0	25.899	4.749	2.458	3.546	3.9e-4	0.003
ENSG00000223722.3	AC023157.1	25.694	0.462	38.309	4.749	2.297	2.273	0.023	0.095
ENSG00000144785.8	AC073896.1	17.209	0	25.813	4.745	2.334	3.406	6.6e-4	0.005
ENSG00000141738.13	GRB7	20.616	0.189	30.829	4.742	1.651	4.66	3.2e-6	4.0e-5
ENSG00000155254.12	MARVELD1	36.583	1.069	54.34	4.741	0.66	7.122	1.1e-12	3.8e-11
ENSG00000222038.3	POTEJ	17.145	0	25.717	4.74	2.21	5.223	1.8e-7	2.9e-6
ENSG00000104951.15	IL4I1	17.124	0	25.685	4.738	2.148	4.857	1.2e-6	1.7e-5
ENSG00000184840.11	TMED9	282.11	14.626	415.853	4.738	0.576	2.228	0.026	0.104
ENSG00000174028.6	FAM3C2	76.118	3.257	112.548	4.737	0.825	4.436	9.1e-6	1.0e-4
ENSG00000147509.13	RGS20	23.402	0.348	34.928	4.736	1.597	4.903	9.4e-7	1.3e-5
ENSG00000235162.8	C12orf75	499.31	26.679	735.626	4.734	0.534	6.83	8.5e-12	2.8e-10
ENSG00000228407.2	AL139156.2	17.024	0	25.535	4.73	3.248	2.004	0.045	0.161
ENSG00000155660.10	PDIA4	63.837	2.598	94.457	4.73	0.565	7.092	1.3e-12	4.7e-11
ENSG00000159335.15	PTMS	772.744	41.946	1138.14	4.729	0.536	5.867	4.4e-9	9.5e-8
ENSG00000184009.10	ACTG1	1727.14	95.505	2542.95	4.72	0.518	6.411	1.4e-10	3.9e-9
ENSG00000115091.11	ACTR3	216.21	11.158	318.736	4.717	0.524	5.916	3.3e-9	7.3e-8
ENSG00000257464.1	AC125611.1	16.831	0	25.246	4.714	3.522	1.416	0.157	0.416
ENSG00000213145.9	CRIP1	523.937	28.475	771.669	4.712	0.573	5.988	2.1e-9	4.8e-8
ENSG00000090776.5	EFNB1	48.374	1.786	71.668	4.705	0.628	6.225	4.8e-10	1.2e-8
ENSG00000224126.2	UBE2SP2	16.702	0	25.053	4.703	5.949	1.304	0.192	0.481
ENSG00000231752.5	EMBP1	16.678	0	25.017	4.701	2.514	3.677	2.4e-4	0.002
ENSG00000168502.17	MTCL1	30.284	0.772	45.04	4.7	0.752	5.756	8.6e-9	1.8e-7
ENSG00000204310.12	AGPAT1	16.653	0	24.979	4.699	2.14	5	5.7e-7	8.5e-6
ENSG00000273622.1	CDC42EP5	16.631	0	24.947	4.698	2.295	3.87	1.1e-4	9.6e-4
ENSG00000158710.14	TAGLN2	287.231	15.399	423.147	4.693	0.533	6.417	1.4e-10	3.8e-9
ENSG00000082512.14	TRAF5	32.493	0.906	48.286	4.692	0.648	7.086	1.4e-12	4.9e-11
ENSG00000118971.7	CCND2	21.233	0.267	31.716	4.691	0.705	7.568	3.8e-14	1.6e-12
ENSG00000196937.10	FAM3C	185.523	9.629	273.471	4.691	0.654	5.438	5.4e-8	9.8e-7
ENSG00000156508.17	EEF1A1	3564.88	202.5	5246.07	4.688	0.509	6.484	8.9e-11	2.5e-9
ENSG00000024526.16	DEPDC1	17.875	0.077	26.774	4.688	1.091	6.302	2.9e-10	7.6e-9
ENSG00000101255.10	TRIB3	17.937	0.083	26.864	4.685	1.037	6.672	2.5e-11	7.5e-10
ENSG00000153822.13	KCNJ16	16.796	0.018	25.185	4.685	1.57	5.777	7.6e-9	1.6e-7
ENSG00000154640.14	BTG3	29.272	0.734	43.541	4.683	0.75	5.943	2.8e-9	6.2e-8
ENSG00000014914.20	MTMR11	29.899	0.779	44.459	4.675	0.66	6.637	3.2e-11	9.5e-10
ENSG00000070756.15	PABPC1	618.524	34.722	910.426	4.673	0.52	5.723	1.0e-8	2.1e-7
ENSG00000181449.3	SOX2	16.791	0.028	25.172	4.671	1.577	5.359	8.4e-8	1.5e-6
ENSG00000184922.13	FMNL1	31.876	0.904	47.362	4.667	0.676	6.946	3.8e-12	1.3e-10
ENSG00000145107.15	TM4SF19	18.969	0.159	28.375	4.664	1.4	4.243	2.2e-5	2.3e-4
ENSG00000220240.1	AL157777.2	16.211	0	24.317	4.662	4.271	0.984	0.325	0.687
ENSG00000198648.10	STK39	47.351	1.811	70.121	4.661	0.572	6.573	4.9e-11	1.4e-9
ENSG00000197142.10	ACSL5	34.701	1.078	51.512	4.66	0.619	6.507	7.7e-11	2.2e-9
ENSG00000169710.8	FASN	35.076	1.1	52.063	4.659	0.606	5.617	1.9e-8	3.8e-7
ENSG00000101773.18	RBBP8	23.153	0.408	34.525	4.657	0.686	6.321	2.6e-10	6.8e-9
ENSG00000215414.4	PSMA6P1	16.065	0	24.097	4.649	2.423	3.598	3.2e-4	0.002
ENSG00000142669.14	SH3BGRL3	103.947	5.157	153.343	4.648	0.648	5.424	5.8e-8	1.1e-6
ENSG00000064012.21	CASP8	48.921	1.93	72.417	4.647	0.635	6.157	7.4e-10	1.8e-8
ENSG00000228128.6	DDAH2	56.809	2.394	84.017	4.647	0.622	6.018	1.8e-9	4.1e-8
ENSG00000110888.17	CAPRIN2	63.406	2.783	93.717	4.646	0.56	6.395	1.6e-10	4.3e-9
ENSG00000111665.11	CDCA3	34.557	1.088	51.291	4.646	0.73	6.016	1.8e-9	4.1e-8
ENSG00000169230.9	PRELID1	126.693	6.508	186.785	4.644	0.621	5.504	3.7e-8	7.0e-7
ENSG00000161996.18	WDR90	64.605	2.864	95.476	4.642	0.628	5.96	2.5e-9	5.7e-8
ENSG00000167535.7	CACNB3	37.977	1.298	56.317	4.641	0.686	5.677	1.4e-8	2.8e-7
ENSG00000179051.13	RCC2	51.71	2.108	76.511	4.64	0.604	6.708	2.0e-11	6.0e-10
ENSG00000203760.8	CENPW	22.691	0.398	33.838	4.639	1.253	3.64	2.7e-4	0.002
ENSG00000224881.1	AC068279.1	26.296	0.613	39.137	4.637	1.156	3.906	9.4e-5	8.5e-4
ENSG00000183853.17	KIRREL1	35.302	1.147	52.38	4.636	0.607	6.759	1.4e-11	4.4e-10
ENSG00000217416.4	ISCA1P1	15.902	0	23.853	4.635	3.024	2.272	0.023	0.095
ENSG00000267228.7	AC012254.2	15.888	0	23.832	4.634	2.818	2.852	0.004	0.024
ENSG00000231116.9	VARS	15.886	0	23.829	4.634	2.165	4.697	2.6e-6	3.4e-5
ENSG00000124491.15	F13A1	24.785	0.527	36.913	4.634	1.32	0.997	0.319	0.679
ENSG00000236608.1	EIF4A1P6	15.879	0	23.819	4.633	2.317	4.191	2.8e-5	2.8e-4
ENSG00000236217.4	C1DP2	15.878	0	23.818	4.633	2.711	2.632	0.008	0.042
ENSG00000105976.14	MET	125.938	6.525	185.644	4.632	0.534	6.933	4.1e-12	1.4e-10
ENSG00000186148.13	AC013268.1	20.474	0.278	30.573	4.627	1.387	4.088	4.3e-5	4.2e-4
ENSG00000100644.16	HIF1A	130.274	6.819	192.002	4.625	0.544	6.654	2.9e-11	8.5e-10
ENSG00000005187.11	ACSM3	43.284	1.641	64.106	4.623	0.723	5.377	7.6e-8	1.3e-6
ENSG00000229054.1	RPS29P14	15.76	0	23.639	4.623	4.695	0.843	0.399	0.77
ENSG00000113368.11	LMNB1	35.681	1.193	52.925	4.62	0.656	7.988	1.4e-15	6.6e-14
ENSG00000130513.6	GDF15	31.101	0.926	46.189	4.615	0.882	5.75	8.9e-9	1.8e-7
ENSG00000137563.11	GGH	21.819	0.371	32.542	4.612	0.859	5.378	7.5e-8	1.3e-6
ENSG00000069482.6	GAL	15.606	0	23.41	4.609	2.484	3.594	3.3e-4	0.003
ENSG00000064666.14	CNN2	63.819	2.903	94.276	4.609	0.637	6.282	3.3e-10	8.6e-9
ENSG00000284627.1	AC079781.4	15.529	0	23.294	4.603	3.702	1.286	0.198	0.492
ENSG00000087088.19	BAX	181.871	10.078	267.768	4.601	0.597	5.339	9.4e-8	1.6e-6
ENSG00000108846.15	ABCC3	24.059	0.519	35.829	4.6	1.258	6.238	4.4e-10	1.1e-8
ENSG00000270532.1	PEBP1P2	15.453	0	23.18	4.596	2.519	3.145	0.002	0.01
ENSG00000136193.16	SCRN1	23.51	0.492	35.019	4.593	0.6	7.921	2.3e-15	1.1e-13
ENSG00000172757.12	CFL1	803.713	48.118	1181.51	4.589	0.559	5.786	7.2e-9	1.5e-7
ENSG00000148773.13	MKI67	15.608	0.016	23.404	4.585	1.001	8.694	3.5e-18	2.1e-16
ENSG00000242550.5	SERPINB10	16.434	0.067	24.617	4.585	2.101	2.595	0.009	0.046
ENSG00000101311.15	FERMT1	15.332	0	22.997	4.585	2.138	5.403	6.5e-8	1.2e-6
ENSG00000275428.2	AC024940.7	17.384	0.131	26.011	4.578	2.14	2.893	0.004	0.021
ENSG00000177989.13	ODF3B	34.549	1.188	51.229	4.577	0.794	4.302	1.7e-5	1.8e-4
ENSG00000088325.15	TPX2	24.184	0.553	36	4.575	0.623	7.472	7.9e-14	3.2e-12
ENSG00000072786.12	STK10	37.277	1.362	55.234	4.573	0.79	2.026	0.043	0.155
ENSG00000175505.10	CLCF1	20.717	0.344	30.903	4.569	0.859	6.2	5.7e-10	1.4e-8
ENSG00000135480.15	KRT7	17.021	0.116	25.473	4.568	1.733	3.625	2.9e-4	0.002
ENSG00000143418.19	CERS2	162.849	9.153	239.697	4.567	0.545	4.464	8.0e-6	9.3e-5
ENSG00000076382.16	SPAG5	15.64	0.033	23.443	4.565	1.212	5.803	6.5e-9	1.4e-7
ENSG00000184374.2	COLEC10	15.04	0	22.561	4.558	2.199	4.28	1.9e-5	2.0e-4
ENSG00000262154.1	EIF1P4	14.993	0	22.489	4.554	2.875	2.111	0.035	0.131
ENSG00000102359.6	SRPX2	24.944	0.622	37.105	4.554	0.747	4.252	2.1e-5	2.2e-4
ENSG00000023445.13	BIRC3	34.662	1.23	51.378	4.554	0.59	7.761	8.4e-15	3.7e-13
ENSG00000149798.4	CDC42EP2	26.746	0.741	39.748	4.549	0.676	6.46	1.0e-10	2.9e-9
ENSG00000168824.14	NSG1	16.8	0.12	25.14	4.544	1.718	2.681	0.007	0.037
ENSG00000250441.1	AC109481.1	14.885	0	22.328	4.544	3.237	1.718	0.086	0.267
ENSG00000025708.13	TYMP	53.685	2.454	79.301	4.539	0.688	5.313	1.1e-7	1.9e-6
ENSG00000183421.11	RIPK4	15.362	0.034	23.026	4.538	1.181	6.825	8.8e-12	2.8e-10
ENSG00000205809.9	KLRC2	14.817	0	22.226	4.538	2.402	3.865	1.1e-4	9.8e-4
ENSG00000278622.4	TSEN34	14.807	0	22.21	4.537	2.188	4.393	1.1e-5	1.2e-4
ENSG00000184445.11	KNTC1	27.781	0.827	41.258	4.532	0.663	6.569	5.1e-11	1.5e-9
ENSG00000232690.1	HSPE1P9	14.72	0	22.081	4.529	3.276	1.823	0.068	0.224
ENSG00000139629.15	GALNT6	19.139	0.281	28.567	4.528	0.96	7.248	4.2e-13	1.6e-11
ENSG00000163040.14	CCDC74A	17.533	0.182	26.209	4.525	1.144	4.905	9.4e-7	1.3e-5
ENSG00000103855.17	CD276	44.93	1.935	66.427	4.522	0.605	5.593	2.2e-8	4.3e-7
ENSG00000224156.10	TUBB	398.838	24.554	585.98	4.522	0.524	6.094	1.1e-9	2.6e-8
ENSG00000140937.13	CDH11	24.568	0.636	36.534	4.52	0.88	3.828	1.3e-4	0.001
ENSG00000230108.3	TNF	14.625	0	21.938	4.52	2.161	4.651	3.3e-6	4.1e-5
ENSG00000129226.13	CD68	37.251	1.454	55.149	4.516	0.731	5.448	5.1e-8	9.3e-7
ENSG00000105011.8	ASF1B	15.102	0.035	22.636	4.514	1.598	4.898	9.7e-7	1.4e-5
ENSG00000109103.11	UNC119	35.202	1.327	52.139	4.513	0.737	3.795	1.5e-4	0.001
ENSG00000125753.13	VASP	121.599	6.894	178.952	4.511	0.586	5.283	1.3e-7	2.2e-6
ENSG00000231744.1	AL669818.1	14.505	0	21.757	4.508	2.489	3.237	0.001	0.008
ENSG00000141380.13	SS18	68.271	3.47	100.672	4.507	0.548	6.007	1.9e-9	4.3e-8
ENSG00000263528.7	IKBKE	14.491	0	21.736	4.507	2.152	4.904	9.4e-7	1.3e-5
ENSG00000277196.4	AC007325.2	63.192	3.146	93.215	4.506	0.705	4.806	1.5e-6	2.1e-5
ENSG00000102048.15	ASB9	19.656	0.335	29.316	4.505	1.131	5.395	6.9e-8	1.2e-6
ENSG00000225343.1	RPL21P66	14.468	0	21.703	4.505	2.663	2.738	0.006	0.032
ENSG00000103647.12	CORO2B	18.458	0.261	27.556	4.501	0.711	7.543	4.6e-14	1.9e-12
ENSG00000231635.1	ATP5F1BP1	14.417	0	21.625	4.5	2.333	4.316	1.6e-5	1.7e-4
ENSG00000276111.3	SDCCAG8	27.113	0.824	40.257	4.499	0.698	6.209	5.3e-10	1.3e-8
ENSG00000059573.8	ALDH18A1	29.753	0.996	44.131	4.499	0.624	6.447	1.1e-10	3.1e-9
ENSG00000234704.9	BRD2	14.384	0	21.577	4.497	2.129	5.278	1.3e-7	2.2e-6
ENSG00000182718.16	ANXA2	1113.63	71.623	1634.64	4.493	0.534	5.95	2.7e-9	6.0e-8
ENSG00000179750.15	APOBEC3B	15.284	0.062	22.894	4.492	1.634	4.55	5.4e-6	6.5e-5
ENSG00000167281.18	RBFOX3	15.48	0.076	23.182	4.49	1.165	5.571	2.5e-8	4.9e-7
ENSG00000157168.18	NRG1	17.104	0.183	25.564	4.489	0.908	6.529	6.6e-11	1.9e-9
ENSG00000226792.7	C13orf42	22.977	0.57	34.18	4.486	1.4	3.132	0.002	0.011
ENSG00000112576.12	CCND3	78.17	4.186	115.162	4.485	0.619	3.649	2.6e-4	0.002
ENSG00000123485.11	HJURP	14.265	0	21.397	4.485	2.14	4.967	6.8e-7	1.0e-5
ENSG00000223962.1	UBBP3	14.261	0	21.392	4.485	3.562	1.4	0.161	0.424
ENSG00000213123.10	TCTEX1D2	30.601	1.071	45.365	4.485	1.071	3.902	9.6e-5	8.6e-4
ENSG00000153551.13	CMTM7	19.893	0.374	29.652	4.479	0.912	5.578	2.4e-8	4.7e-7
ENSG00000111247.14	RAD51AP1	17.569	0.222	26.243	4.479	1.24	5.513	3.5e-8	6.7e-7
ENSG00000162595.6	DIRAS3	23.537	0.616	34.998	4.477	1.272	3.29	0.001	0.007
ENSG00000115129.13	TP53I3	33.903	1.302	50.204	4.475	0.707	5.826	5.7e-9	1.2e-7
ENSG00000156970.12	BUB1B	14.158	0	21.237	4.475	2.146	4.862	1.2e-6	1.6e-5
ENSG00000171314.8	PGAM1	185.458	11.314	272.53	4.473	0.544	5.945	2.8e-9	6.2e-8
ENSG00000134072.10	CAMK1	38.24	1.594	56.563	4.472	0.851	4.317	1.6e-5	1.7e-4
ENSG00000163565.18	IFI16	113.23	6.587	166.552	4.465	0.544	5.261	1.4e-7	2.4e-6
ENSG00000123975.4	CKS2	90.755	5.097	133.584	4.464	0.749	4.537	5.7e-6	6.8e-5
ENSG00000142347.17	MYO1F	34.489	1.366	51.05	4.459	0.958	2.837	0.005	0.025
ENSG00000160883.10	HK3	15.057	0.072	22.549	4.457	2.072	1.724	0.085	0.265
ENSG00000110697.12	PITPNM1	64.685	3.387	95.335	4.457	0.576	5.916	3.3e-9	7.3e-8
ENSG00000196262.13	PPIA	1688	112.07	2475.97	4.453	0.517	5.906	3.5e-9	7.7e-8
ENSG00000167088.10	SNRPD1	147.986	8.981	217.489	4.452	0.575	3.128	0.002	0.011
ENSG00000178919.8	FOXE1	13.923	0	20.885	4.452	2.14	5.198	2.0e-7	3.3e-6
ENSG00000222009.8	BTBD19	21.136	0.484	31.462	4.451	0.751	5.451	5.0e-8	9.1e-7
ENSG00000156127.6	BATF	13.903	0	20.854	4.45	2.901	2.193	0.028	0.112
ENSG00000110719.9	TCIRG1	62.66	3.283	92.348	4.446	0.603	4.718	2.4e-6	3.1e-5
ENSG00000121152.9	NCAPH	18.062	0.284	26.951	4.444	1.213	5.792	7.0e-9	1.5e-7
ENSG00000184363.9	PKP3	16.082	0.154	24.046	4.44	1.587	5.115	3.1e-7	4.9e-6
ENSG00000152076.18	CCDC74B	14.08	0.02	21.11	4.438	1.628	4.65	3.3e-6	4.2e-5
ENSG00000276043.4	UHRF1	17.835	0.274	26.615	4.438	0.77	7.276	3.4e-13	1.3e-11
ENSG00000232514.1	AL356968.1	18.424	0.318	27.476	4.433	2.091	2.507	0.012	0.056
ENSG00000105281.12	SLC1A5	29.725	1.088	44.043	4.431	0.62	6.404	1.5e-10	4.1e-9
ENSG00000115419.12	GLS	104.058	6.144	153.016	4.43	0.639	4.176	3.0e-5	3.0e-4
ENSG00000054356.13	PTPRN	13.68	0	20.519	4.428	2.438	3.799	1.5e-4	0.001
ENSG00000167797.7	CDK2AP2	85.059	4.901	125.138	4.418	0.592	5.195	2.0e-7	3.3e-6
ENSG00000052126.14	PLEKHA5	24.028	0.721	35.682	4.414	0.693	5.219	1.8e-7	3.0e-6
ENSG00000238271.2	IFNWP19	13.474	0	20.211	4.407	2.439	3.088	0.002	0.012
ENSG00000259440.2	NPM1P43	15.252	0.123	22.816	4.406	1.951	3.251	0.001	0.008
ENSG00000160606.10	TLCD1	14.657	0.084	21.943	4.403	1.7	3.749	1.8e-4	0.001
ENSG00000111786.8	SRSF9	194.99	12.594	286.188	4.401	0.556	5.701	1.2e-8	2.4e-7
ENSG00000145423.4	SFRP2	29.097	1.088	43.101	4.401	1.156	3.566	3.6e-4	0.003
ENSG00000175711.8	B3GNTL1	31.794	1.28	47.051	4.398	0.686	5.27	1.4e-7	2.3e-6
ENSG00000204556.4	AL450124.1	27.419	0.976	40.641	4.397	1.72	2.105	0.035	0.133
ENSG00000150961.14	SEC24D	28.924	1.081	42.845	4.397	0.693	3.273	0.001	0.007
ENSG00000106397.11	PLOD3	78.023	4.497	114.786	4.397	0.563	5.469	4.5e-8	8.4e-7
ENSG00000164647.8	STEAP1	20.045	0.464	29.835	4.396	1.118	4.723	2.3e-6	3.0e-5
ENSG00000174567.7	GOLT1A	13.371	0	20.056	4.396	2.293	3.615	3.0e-4	0.002
ENSG00000084234.16	APLP2	316.566	21.126	464.286	4.394	0.59	5.208	1.9e-7	3.1e-6
ENSG00000079691.17	CARMIL1	15.975	0.183	23.871	4.394	0.862	6.602	4.0e-11	1.2e-9
ENSG00000146670.9	CDCA5	14.542	0.085	21.771	4.392	1.05	6.31	2.8e-10	7.3e-9
ENSG00000163435.15	ELF3	20.724	0.518	30.828	4.39	0.912	5.777	7.6e-9	1.6e-7
ENSG00000233939.1	AC114755.4	18.579	0.37	27.684	4.388	2.258	2.244	0.025	0.101
ENSG00000172927.7	MYEOV	19.11	0.408	28.461	4.388	1.279	4.873	1.1e-6	1.5e-5
ENSG00000130066.16	SAT1	532.843	36.368	781.081	4.387	0.604	5.221	1.8e-7	2.9e-6
ENSG00000257390.5	AC023055.1	13.233	0	19.85	4.382	2.692	2.848	0.004	0.024
ENSG00000105486.13	LIG1	29.254	1.126	43.319	4.382	0.669	6.123	9.2e-10	2.2e-8
ENSG00000229156.1	CR769776.2	20.843	0.535	30.997	4.382	2.096	2.108	0.035	0.132
ENSG00000204272.12	NBDY	58.716	3.2	86.474	4.38	0.687	4.37	1.2e-5	1.4e-4
ENSG00000167614.13	TTYH1	17.159	0.28	25.599	4.378	1.869	3.967	7.3e-5	6.7e-4
ENSG00000198914.3	POU3F3	15.343	0.154	22.937	4.374	0.925	6.242	4.3e-10	1.1e-8
ENSG00000233843.1	CYCSP48	13.156	0	19.733	4.374	3.171	1.866	0.062	0.208
ENSG00000281775.2	FTCD	13.145	0	19.717	4.373	3.339	1.588	0.112	0.326
ENSG00000272006.1	AC037487.3	13.137	0	19.706	4.372	3.998	1.108	0.268	0.605
ENSG00000064115.10	TM7SF3	100.864	6.212	148.19	4.371	0.566	5.111	3.2e-7	5.0e-6
ENSG00000088986.10	DYNLL1	381.556	26.122	559.273	4.369	0.569	5.497	3.9e-8	7.2e-7
ENSG00000156510.12	HKDC1	13.104	0	19.656	4.368	2.141	4.953	7.3e-7	1.1e-5
ENSG00000171208.9	NETO2	24.362	0.799	36.144	4.368	0.669	6.503	7.9e-11	2.2e-9
ENSG00000073067.13	CYP2W1	13.096	0	19.644	4.368	2.213	4.284	1.8e-5	2.0e-4
ENSG00000102172.15	SMS	237.261	15.912	347.935	4.367	0.524	5.943	2.8e-9	6.2e-8
ENSG00000164078.12	MST1R	16.495	0.246	24.619	4.362	1.01	5	5.7e-7	8.5e-6
ENSG00000177990.11	DPY19L2	35.58	1.609	52.565	4.36	0.845	5.287	1.2e-7	2.1e-6
ENSG00000161800.12	RACGAP1	32.278	1.376	47.729	4.358	0.63	6.42	1.4e-10	3.7e-9
ENSG00000134871.17	COL4A2	128.714	8.274	188.934	4.356	0.531	4.174	3.0e-5	3.0e-4
ENSG00000205581.10	HMGN1	186.252	12.425	273.166	4.352	0.538	5.469	4.5e-8	8.3e-7
ENSG00000089127.12	OAS1	27.266	1.027	40.386	4.352	0.858	5.483	4.2e-8	7.8e-7
ENSG00000010278.13	CD9	229.751	15.548	336.853	4.352	0.569	5.594	2.2e-8	4.3e-7
ENSG00000131941.7	RHPN2	19.556	0.474	29.097	4.352	1.017	6.534	6.4e-11	1.8e-9
ENSG00000099956.19	SMARCB1	19.693	0.484	29.298	4.351	1.246	0.977	0.328	0.692
ENSG00000092820.17	EZR	143.719	9.393	210.882	4.35	0.523	5.946	2.7e-9	6.1e-8
ENSG00000244306.10	AL589743.1	19.785	0.495	29.43	4.347	0.701	6.771	1.3e-11	4.1e-10
ENSG00000164171.10	ITGA2	14.866	0.147	22.225	4.34	0.674	8.689	3.6e-18	2.2e-16
ENSG00000134287.9	ARF3	79.927	4.851	117.464	4.34	0.568	6.507	7.6e-11	2.1e-9
ENSG00000215895.4	AL354702.1	12.821	0	19.232	4.339	2.338	4.397	1.1e-5	1.2e-4
ENSG00000108511.9	HOXB6	20.215	0.536	30.054	4.338	0.895	3.278	0.001	0.007
ENSG00000250983.1	AC022296.2	12.814	0	19.221	4.338	4.948	0.901	0.368	0.739
ENSG00000275873.2	LMNTD2	12.812	0	19.217	4.338	2.261	4.024	5.7e-5	5.4e-4
ENSG00000072110.13	ACTN1	72.472	4.323	106.547	4.337	0.627	4.899	9.6e-7	1.4e-5
ENSG00000091986.15	CCDC80	45.073	2.34	66.44	4.336	0.875	0.613	0.54	0.889
ENSG00000236490.9	TAPBP	27.911	1.101	41.316	4.332	0.685	6.558	5.5e-11	1.6e-9
ENSG00000130813.17	C19orf66	31.636	1.372	46.767	4.332	0.665	5.482	4.2e-8	7.8e-7
ENSG00000276935.4	MBOAT7	17.03	0.311	25.39	4.331	0.856	4.779	1.8e-6	2.4e-5
ENSG00000140379.7	BCL2A1	24.083	0.824	35.713	4.331	1.07	4.154	3.3e-5	3.3e-4
ENSG00000104783.11	KCNN4	13.231	0.035	19.829	4.331	1.633	4.465	8.0e-6	9.2e-5
ENSG00000111331.12	OAS3	25.405	0.923	37.646	4.329	0.647	6.591	4.4e-11	1.3e-9
ENSG00000206053.12	JPT2	64.016	3.736	94.156	4.329	0.545	5.908	3.5e-9	7.6e-8
ENSG00000206427.11	PRRC2A	12.723	0	19.085	4.328	2.165	4.645	3.4e-6	4.3e-5
ENSG00000166532.15	RIMKLB	97.62	6.188	143.336	4.328	0.621	4.811	1.5e-6	2.0e-5
ENSG00000141293.15	SKAP1	12.705	0	19.058	4.326	2.22	4.186	2.8e-5	2.9e-4
ENSG00000130313.6	PGLS	70.832	4.247	104.124	4.324	0.621	5.252	1.5e-7	2.5e-6
ENSG00000101187.15	SLCO4A1	60.147	3.474	88.483	4.322	0.604	4.486	7.3e-6	8.4e-5
ENSG00000196975.15	ANXA4	117.818	7.713	172.871	4.319	0.571	5.634	1.8e-8	3.5e-7
ENSG00000053747.15	LAMA3	18.196	0.41	27.089	4.317	0.878	4.48	7.5e-6	8.7e-5
ENSG00000282937.4	PRSS22	12.612	0	18.917	4.316	2.217	4.121	3.8e-5	3.7e-4
ENSG00000118523.5	CTGF	122.058	8.056	179.059	4.314	0.631	4.831	1.4e-6	1.9e-5
ENSG00000226421.1	SLC25A5P5	12.582	0	18.873	4.313	2.399	3.662	2.5e-4	0.002
ENSG00000163430.11	FSTL1	106.898	6.95	156.872	4.312	0.679	1.377	0.168	0.437
ENSG00000185522.8	LMNTD2	12.57	0	18.855	4.311	2.32	3.655	2.6e-4	0.002
ENSG00000227656.3	RPL3P2	12.995	0.032	19.477	4.311	2.366	3.982	6.8e-5	6.3e-4
ENSG00000214297.3	ALDOAP2	12.546	0	18.82	4.309	2.395	3.826	1.3e-4	0.001
ENSG00000110057.7	UNC93B1	34.474	1.62	50.901	4.308	0.657	5.864	4.5e-9	9.7e-8
ENSG00000264064.2	AC226154.1	12.537	0	18.806	4.308	4.184	1.272	0.203	0.5
ENSG00000066322.14	ELOVL1	84.717	5.339	124.406	4.306	0.609	5.304	1.1e-7	2.0e-6
ENSG00000077942.18	FBLN1	74.786	4.614	109.871	4.304	0.941	1.269	0.204	0.502
ENSG00000116661.10	FBXO2	16.924	0.332	25.221	4.299	1.108	4.011	6.0e-5	5.7e-4
ENSG00000079462.7	PAFAH1B3	35.277	1.698	52.066	4.298	0.755	4.427	9.5e-6	1.1e-4
ENSG00000169435.13	RASSF6	13.022	0.043	19.512	4.298	1.031	6.71	1.9e-11	6.0e-10
ENSG00000261052.5	SULT1A3	38.937	1.973	57.42	4.297	0.711	5.344	9.1e-8	1.6e-6
ENSG00000134285.10	FKBP11	28.53	1.199	42.195	4.296	0.709	5.805	6.4e-9	1.4e-7
ENSG00000179460.5	EEF1A1P27	15.336	0.217	22.895	4.295	1.357	4.052	5.1e-5	4.9e-4
ENSG00000140368.12	PSTPIP1	21.376	0.668	31.73	4.295	1.455	2.394	0.017	0.073
ENSG00000152952.11	PLOD2	34.843	1.676	51.427	4.292	0.608	6.092	1.1e-9	2.6e-8
ENSG00000141506.13	PIK3R5	12.732	0.026	19.085	4.291	1.907	3.016	0.003	0.015
ENSG00000125398.6	SOX9	24.264	0.892	35.951	4.288	0.654	5.996	2.0e-9	4.6e-8
ENSG00000147010.17	SH3KBP1	49.742	2.804	73.212	4.286	0.564	5.612	2.0e-8	3.9e-7
ENSG00000008283.15	CYB561	22.921	0.795	33.984	4.284	0.694	5.89	3.9e-9	8.4e-8
ENSG00000196154.11	S100A4	725.391	53.522	1061.33	4.284	0.659	4.315	1.6e-5	1.7e-4
ENSG00000162522.10	KIAA1522	20.286	0.599	30.13	4.283	0.761	5.283	1.3e-7	2.2e-6
ENSG00000067057.16	PFKP	58.098	3.44	85.426	4.283	0.578	6.336	2.4e-10	6.2e-9
ENSG00000013573.16	DDX11	36.022	1.786	53.14	4.281	0.619	5.36	8.3e-8	1.5e-6
ENSG00000107833.10	NPM3	55.729	3.271	81.958	4.28	0.687	4.807	1.5e-6	2.1e-5
ENSG00000011304.19	PTBP1	133.258	9.114	195.331	4.279	0.535	5.767	8.1e-9	1.7e-7
ENSG00000182195.7	LDOC1	25.643	1.009	37.96	4.278	0.861	4.362	1.3e-5	1.4e-4
ENSG00000123384.13	LRP1	60.814	3.663	89.39	4.277	0.69	2.714	0.007	0.034
ENSG00000109881.16	CCDC34	18.505	0.472	27.522	4.276	0.802	4.594	4.3e-6	5.3e-5
ENSG00000213977.7	TAX1BP3	95.076	6.252	139.489	4.276	0.576	5.412	6.2e-8	1.1e-6
ENSG00000224774.7	CSNK2B	51.303	2.953	75.478	4.274	0.672	4.445	8.8e-6	1.0e-4
ENSG00000102032.12	RENBP	22.079	0.745	32.746	4.274	1.504	1.422	0.155	0.413
ENSG00000100097.11	LGALS1	7415.36	559.861	10843.1	4.273	0.831	0.353	0.724	0.988
ENSG00000111679.16	PTPN6	22.415	0.773	33.237	4.271	0.747	6.549	5.8e-11	1.7e-9
ENSG00000196411.9	EPHB4	33.832	1.639	49.928	4.27	0.696	4.433	9.3e-6	1.1e-4
ENSG00000164889.13	SLC4A2	87.735	5.748	128.729	4.265	0.547	3.54	4.0e-4	0.003
ENSG00000100031.18	GGT1	21.74	0.73	32.245	4.264	0.76	4.49	7.1e-6	8.3e-5
ENSG00000173432.10	SAA1	22.166	0.763	32.867	4.264	1.652	2.423	0.015	0.068
ENSG00000147536.11	GINS4	13.07	0.072	19.568	4.262	1.043	4.934	8.0e-7	1.2e-5
ENSG00000182871.14	COL18A1	59.174	3.585	86.968	4.262	0.639	4.504	6.7e-6	7.9e-5
ENSG00000096092.5	TMEM14A	24.625	0.958	36.459	4.258	0.887	4.328	1.5e-5	1.6e-4
ENSG00000111602.11	TIMELESS	17.562	0.419	26.134	4.257	0.649	6.771	1.3e-11	4.1e-10
ENSG00000228264.1	PSMD8P1	13.744	0.128	20.552	4.257	1.889	3.234	0.001	0.008
ENSG00000075624.14	ACTB	2320.37	176.582	3392.27	4.256	0.544	5.419	6.0e-8	1.1e-6
ENSG00000096433.10	ITPR3	24.172	0.928	35.794	4.254	0.542	7.168	7.6e-13	2.8e-11
ENSG00000105409.17	ATP1A3	14.293	0.174	21.353	4.251	1.72	2.379	0.017	0.075
ENSG00000153048.10	CARHSP1	94.593	6.346	138.717	4.249	0.584	4.379	1.2e-5	1.3e-4
ENSG00000124116.18	WFDC3	18.949	0.535	28.157	4.248	1.416	2.772	0.006	0.029
ENSG00000197965.11	MPZL1	55.791	3.378	81.998	4.245	0.552	6.307	2.8e-10	7.4e-9
ENSG00000278763.1	FAM27B	11.968	0	17.951	4.244	4.085	1.068	0.285	0.632
ENSG00000227973.1	PIN4P1	11.949	0	17.923	4.242	2.914	2.227	0.026	0.104
ENSG00000107099.15	DOCK8	17.31	0.416	25.757	4.24	0.999	1.648	0.099	0.298
ENSG00000094755.16	GABRP	31.385	1.507	46.323	4.238	1.367	2.596	0.009	0.046
ENSG00000131016.16	AKAP12	28.72	1.301	42.429	4.238	0.539	7.045	1.8e-12	6.5e-11
ENSG00000271687.1	MTND5P10	12.424	0.04	18.616	4.237	1.764	4.324	1.5e-5	1.7e-4
ENSG00000139625.12	MAP3K12	32.184	1.578	47.487	4.233	0.731	4.874	1.1e-6	1.5e-5
ENSG00000213075.7	RPL31P11	11.865	0	17.797	4.232	2.871	2.243	0.025	0.101
ENSG00000135046.13	ANXA1	167.25	12.08	244.835	4.232	0.636	4.426	9.6e-6	1.1e-4
ENSG00000198856.12	OSTC	146.041	10.445	213.84	4.23	0.626	2.803	0.005	0.027
ENSG00000244509.3	APOBEC3C	20.526	0.678	30.451	4.229	0.69	5.859	4.7e-9	1.0e-7
ENSG00000099256.18	PRTFDC1	14.141	0.182	21.121	4.226	1.124	5.264	1.4e-7	2.4e-6
ENSG00000129451.11	KLK10	14.724	0.228	21.972	4.225	1.109	5.217	1.8e-7	3.0e-6
ENSG00000155366.16	RHOC	262.057	19.55	383.31	4.225	0.551	4.786	1.7e-6	2.3e-5
ENSG00000128604.19	IRF5	12.748	0.075	19.085	4.224	1.156	4.591	4.4e-6	5.4e-5
ENSG00000029993.14	HMGB3	30.944	1.499	45.667	4.223	0.677	4.27	2.0e-5	2.1e-4
ENSG00000156427.7	FGF18	18.23	0.505	27.093	4.223	0.885	4.854	1.2e-6	1.7e-5
ENSG00000228305.2	AC016734.1	14.033	0.177	20.962	4.222	2.058	2.814	0.005	0.026
ENSG00000276701.2	MIF	490.708	37.501	717.311	4.222	0.597	4.227	2.4e-5	2.5e-4
ENSG00000163931.15	TKT	84.144	5.676	123.379	4.22	0.558	5.438	5.4e-8	9.8e-7
ENSG00000107819.13	SFXN3	45.116	2.616	66.366	4.219	0.597	5.831	5.5e-9	1.2e-7
ENSG00000080031.9	PTPRH	15.014	0.256	22.393	4.219	1.072	6.24	4.4e-10	1.1e-8
ENSG00000168268.10	NT5DC2	65.463	4.23	96.079	4.214	0.74	3.662	2.5e-4	0.002
ENSG00000228425.9	VPS52	11.697	0	17.546	4.213	2.155	4.717	2.4e-6	3.1e-5
ENSG00000135185.11	TMEM243	39.765	2.212	58.542	4.213	0.746	5.085	3.7e-7	5.7e-6
ENSG00000145703.15	IQGAP2	17.763	0.479	26.405	4.211	0.929	6.675	2.5e-11	7.4e-10
ENSG00000118257.16	NRP2	25.876	1.129	38.25	4.205	0.618	6.617	3.7e-11	1.1e-9
ENSG00000233450.7	KIFC1	11.941	0.025	17.898	4.204	1.61	4.723	2.3e-6	3.0e-5
ENSG00000132561.13	MATN2	36.576	1.986	53.871	4.2	0.821	4.161	3.2e-5	3.2e-4
ENSG00000213676.11	ATF6B	11.559	0	17.338	4.197	2.173	4.781	1.7e-6	2.3e-5
ENSG00000176907.4	TCIM	70.774	4.73	103.797	4.193	0.663	4.762	1.9e-6	2.5e-5
ENSG00000276944.2	AC243960.6	14.876	0.269	22.18	4.192	1.583	3.256	0.001	0.007
ENSG00000187741.14	FANCA	15.047	0.285	22.428	4.189	0.984	5.988	2.1e-9	4.8e-8
ENSG00000139725.7	RHOF	37.052	2.057	54.55	4.184	0.663	6.834	8.2e-12	2.7e-10
ENSG00000164379.6	FOXQ1	11.432	0	17.147	4.182	2.245	4.607	4.1e-6	5.0e-5
ENSG00000131650.13	KREMEN2	14.218	0.225	21.215	4.181	0.881	5.826	5.7e-9	1.2e-7
ENSG00000197415.11	VEPH1	16.072	0.38	23.919	4.175	1.205	5.998	2.0e-9	4.6e-8
ENSG00000188643.10	S100A16	246.055	18.984	359.591	4.173	0.555	5.203	2.0e-7	3.2e-6
ENSG00000175352.10	NRIP3	12.082	0.059	18.094	4.173	1.098	6.408	1.5e-10	4.0e-9
ENSG00000146072.6	TNFRSF21	26.206	1.202	38.708	4.172	0.659	5.447	5.1e-8	9.4e-7
ENSG00000077238.13	IL4R	32.369	1.703	47.703	4.171	0.591	6.063	1.3e-9	3.1e-8
ENSG00000225947.1	AL596448.1	11.323	0	16.985	4.169	2.923	2.176	0.03	0.115
ENSG00000163975.11	MELTF	18.677	0.597	27.717	4.168	0.785	6.077	1.2e-9	2.9e-8
ENSG00000136943.10	CTSV	14.678	0.274	21.88	4.166	0.799	4.805	1.5e-6	2.1e-5
ENSG00000110455.13	ACCS	32.4	1.718	47.741	4.165	0.674	4.551	5.3e-6	6.5e-5
ENSG00000136574.17	GATA4	11.281	0	16.922	4.164	2.169	4.813	1.5e-6	2.0e-5
ENSG00000164924.17	YWHAZ	314.395	24.73	459.227	4.161	0.516	5.63	1.8e-8	3.6e-7
ENSG00000224543.4	SNRPGP15	11.238	0	16.857	4.158	5.315	0.77	0.441	0.819
ENSG00000103335.22	PIEZO1	53.529	3.47	78.559	4.154	0.562	5.774	7.7e-9	1.6e-7
ENSG00000196950.13	SLC39A10	30.079	1.548	44.344	4.153	0.587	7.296	3.0e-13	1.1e-11
ENSG00000282813.1	ARMC10	87.804	6.291	128.56	4.151	0.643	4.94	7.8e-7	1.1e-5
ENSG00000226273.2	AC079305.2	11.16	0	16.739	4.149	2.624	2.849	0.004	0.024
ENSG00000186891.13	TNFRSF18	12.458	0.109	18.633	4.146	1.796	3.511	4.5e-4	0.003
ENSG00000230888.3	SUMO2P1	11.132	0	16.698	4.146	3.517	1.496	0.135	0.373
ENSG00000142945.12	KIF2C	13.508	0.198	20.164	4.143	1.058	6.279	3.4e-10	8.7e-9
ENSG00000116745.6	RPE65	11.097	0	16.646	4.141	2.329	4.395	1.1e-5	1.2e-4
ENSG00000132793.11	LPIN3	18.374	0.606	27.259	4.137	0.658	5.727	1.0e-8	2.1e-7
ENSG00000100379.17	KCTD17	16.059	0.415	23.881	4.136	1.057	4.533	5.8e-6	6.9e-5
ENSG00000162512.15	SDC3	29.694	1.548	43.768	4.135	0.64	5.147	2.6e-7	4.2e-6
ENSG00000258118.1	PPIAP44	11.042	0	16.563	4.134	4.472	1.108	0.268	0.605
ENSG00000010327.10	STAB1	40.756	2.47	59.899	4.133	1.019	3.13	0.002	0.011
ENSG00000233913.7	RPL10P9	11.033	0	16.549	4.133	2.382	3.218	0.001	0.008
ENSG00000163694.14	RBM47	13.827	0.232	20.624	4.133	0.768	6.892	5.5e-12	1.8e-10
ENSG00000145779.7	TNFAIP8	19.174	0.678	28.423	4.132	0.801	4.218	2.5e-5	2.6e-4
ENSG00000169410.9	PTPN9	21.721	0.891	32.135	4.131	0.613	5.215	1.8e-7	3.0e-6
ENSG00000181104.6	F2R	19.137	0.677	28.367	4.13	0.617	6.442	1.2e-10	3.2e-9
ENSG00000065809.13	FAM107B	32.339	1.778	47.619	4.129	0.654	7.228	4.9e-13	1.8e-11
ENSG00000131473.16	ACLY	51.23	3.354	75.168	4.129	0.55	5.766	8.1e-9	1.7e-7
ENSG00000224578.5	HNRNPA1P48	20.608	0.804	30.51	4.126	1.007	3.988	6.7e-5	6.2e-4
ENSG00000140263.13	SORD	24.071	1.097	35.557	4.123	0.761	3.675	2.4e-4	0.002
ENSG00000100365.14	NCF4	13.296	0.196	19.845	4.123	1.311	4.022	5.8e-5	5.5e-4
ENSG00000197122.11	SRC	22.432	0.962	33.167	4.123	0.691	6.347	2.2e-10	5.8e-9
ENSG00000135124.14	P2RX4	18.007	0.593	26.715	4.121	0.76	4.994	5.9e-7	8.8e-6
ENSG00000227672.1	RPL3P2	11.266	0.032	16.883	4.115	2.381	3.869	1.1e-4	9.7e-4
ENSG00000147044.21	CASK	33.426	1.899	49.19	4.114	0.569	5.471	4.5e-8	8.2e-7
ENSG00000146243.13	IRAK1BP1	21.14	0.865	31.277	4.113	0.831	2.621	0.009	0.043
ENSG00000225165.3	AC090071.1	10.868	0	16.301	4.113	2.606	3.004	0.003	0.016
ENSG00000104611.11	SH2D4A	13.444	0.218	20.057	4.112	1.585	5.045	4.5e-7	6.9e-6
ENSG00000128791.11	TWSG1	41.008	2.543	60.24	4.111	0.683	4.878	1.1e-6	1.5e-5
ENSG00000184084.7	AC091868.1	10.849	0	16.273	4.11	3.353	1.557	0.12	0.341
ENSG00000243014.1	PTMAP8	10.842	0	16.263	4.11	3.207	1.815	0.069	0.227
ENSG00000169100.13	SLC25A6	259.423	21.062	378.604	4.105	0.535	5.249	1.5e-7	2.6e-6
ENSG00000146112.11	PPP1R18	19.084	0.704	28.273	4.103	0.842	3.263	0.001	0.007
ENSG00000204262.11	COL5A2	28.453	1.501	41.928	4.101	1.038	3.553	3.8e-4	0.003
ENSG00000062716.12	VMP1	106.544	8.139	155.747	4.1	0.538	5.859	4.7e-9	1.0e-7
ENSG00000167900.11	TK1	43.912	2.82	64.458	4.099	0.631	5.255	1.5e-7	2.5e-6
ENSG00000006534.15	ALDH3B1	16.35	0.476	24.287	4.099	0.897	4.402	1.1e-5	1.2e-4
ENSG00000196754.10	S100A2	39.91	2.482	58.624	4.098	0.859	5.135	2.8e-7	4.5e-6
ENSG00000164109.13	MAD2L1	14.376	0.31	21.409	4.097	0.728	4.466	8.0e-6	9.2e-5
ENSG00000028277.21	POU2F2	11.039	0.026	16.545	4.096	1.655	5.033	4.8e-7	7.3e-6
ENSG00000238153.1	Z99755.1	10.727	0	16.091	4.095	2.947	2.086	0.037	0.138
ENSG00000171792.10	RHNO1	34.705	2.045	51.036	4.095	0.64	4.977	6.4e-7	9.5e-6
ENSG00000198805.11	PNP	61.169	4.307	89.6	4.093	0.611	5.268	1.4e-7	2.3e-6
ENSG00000155363.18	MOV10	64.429	4.598	94.345	4.09	0.594	5.526	3.3e-8	6.2e-7
ENSG00000100979.14	PLTP	50.901	3.442	74.631	4.09	0.592	5.16	2.5e-7	4.0e-6
ENSG00000228116.9	PPT2	10.664	0	15.997	4.087	5.913	0.624	0.533	0.884
ENSG00000137203.11	TFAP2A	10.647	0	15.971	4.085	2.195	4.611	4.0e-6	4.9e-5
ENSG00000139178.10	C1RL	38.503	2.392	56.558	4.085	0.625	5.277	1.3e-7	2.2e-6
ENSG00000103316.10	CRYM	115.287	8.994	168.433	4.084	0.567	4.941	7.8e-7	1.1e-5
ENSG00000213983.11	AP1G2	61.606	4.384	90.216	4.082	0.662	5.9	3.6e-9	7.9e-8
ENSG00000101188.4	NTSR1	11.171	0.048	16.733	4.081	1.243	5.599	2.2e-8	4.2e-7
ENSG00000078124.11	ACER3	24.115	1.162	35.591	4.081	0.623	6.295	3.1e-10	7.9e-9
ENSG00000206206.11	DAXX	10.611	0	15.916	4.08	2.154	4.719	2.4e-6	3.1e-5
ENSG00000134690.10	CDCA8	11.315	0.061	16.943	4.08	1.232	5.526	3.3e-8	6.2e-7
ENSG00000132749.10	TESMIN	13.091	0.214	19.529	4.08	1.285	4.644	3.4e-6	4.3e-5
ENSG00000196576.14	PLXNB2	35.161	2.117	51.683	4.079	0.566	5.77	7.9e-9	1.6e-7
ENSG00000236285.1	NPM1P8	10.58	0	15.87	4.076	2.448	3.425	6.2e-4	0.004
ENSG00000167695.14	FAM57A	20.088	0.826	29.718	4.073	0.741	5.565	2.6e-8	5.0e-7
ENSG00000258130.7	AC106782.1	24.043	1.168	35.481	4.072	0.807	5.342	9.2e-8	1.6e-6
ENSG00000117650.12	NEK2	11.907	0.118	17.802	4.071	1.104	5.349	8.9e-8	1.6e-6
ENSG00000101052.12	IFT52	23.934	1.161	35.321	4.071	0.755	4.621	3.8e-6	4.7e-5
ENSG00000106404.13	CLDN15	19.956	0.817	29.525	4.07	0.74	4.763	1.9e-6	2.5e-5
ENSG00000100504.16	PYGL	27.039	1.432	39.843	4.07	0.794	4.016	5.9e-5	5.6e-4
ENSG00000260602.2	HMGN2P40	16.241	0.496	24.113	4.069	2.263	1.949	0.051	0.179
ENSG00000172638.12	EFEMP2	174.362	14.229	254.428	4.068	0.638	3.062	0.002	0.013
ENSG00000239672.7	NME1	107.215	8.408	156.618	4.066	0.614	4.733	2.2e-6	2.9e-5
ENSG00000205078.5	SYCE1L	17.928	0.646	26.57	4.066	1.383	1.668	0.095	0.289
ENSG00000125170.10	DOK4	17.639	0.621	26.148	4.066	0.839	4.446	8.8e-6	1.0e-4
ENSG00000054282.15	SDCCAG8	114.3	9.039	166.931	4.064	0.59	3.313	9.2e-4	0.006
ENSG00000230453.9	ANKRD18B	33.861	2.037	49.773	4.063	0.948	4.734	2.2e-6	2.9e-5
ENSG00000128298.16	BAIAP2L2	13.482	0.264	20.091	4.061	0.885	5.371	7.8e-8	1.4e-6
ENSG00000158106.13	RHPN1	13.5	0.266	20.117	4.061	0.824	6.36	2.0e-10	5.4e-9
ENSG00000106089.11	STX1A	23.647	1.153	34.895	4.059	0.852	4.31	1.6e-5	1.8e-4
ENSG00000149177.12	PTPRJ	14.149	0.324	21.062	4.058	0.635	8.096	5.7e-16	2.8e-14
ENSG00000229207.1	SERPINH1P1	10.437	0	15.656	4.058	2.413	3.808	1.4e-4	0.001
ENSG00000176155.18	CCDC57	49.655	3.429	72.767	4.058	0.677	5.246	1.6e-7	2.6e-6
ENSG00000118508.4	RAB32	20.995	0.923	31.031	4.058	0.801	4.64	3.5e-6	4.3e-5
ENSG00000182578.13	CSF1R	36.271	2.266	53.273	4.055	0.865	3.494	4.8e-4	0.004
ENSG00000282379.1	DTX2	20.354	0.872	30.096	4.054	1.474	0.835	0.404	0.775
ENSG00000102265.11	TIMP1	200.17	16.667	291.922	4.051	0.567	4.692	2.7e-6	3.5e-5
ENSG00000176788.8	BASP1	23.133	1.119	34.139	4.051	0.991	4.435	9.2e-6	1.1e-4
ENSG00000138079.13	SLC3A1	13.767	0.298	20.501	4.05	1.086	3.899	9.6e-5	8.7e-4
ENSG00000242156.1	AC000041.1	10.365	0	15.547	4.048	5.718	0.669	0.503	0.859
ENSG00000189409.13	MMP23B	12.427	0.182	18.55	4.048	1.913	2.964	0.003	0.018
ENSG00000272710.2	AC133041.1	10.36	0	15.54	4.048	4.639	0.83	0.407	0.779
ENSG00000178718.6	RPP25	11.114	0.066	16.638	4.048	1.05	6.287	3.2e-10	8.3e-9
ENSG00000198794.11	SCAMP5	10.79	0.039	16.165	4.046	1.443	3.375	7.4e-4	0.005
ENSG00000182197.10	EXT1	37.235	2.372	54.667	4.045	0.73	3.733	1.9e-4	0.002
ENSG00000150667.7	FSIP1	17.842	0.662	26.432	4.045	1.821	1.676	0.094	0.284
ENSG00000099364.16	FBXL19	19.983	0.851	29.549	4.044	0.641	4.854	1.2e-6	1.7e-5
ENSG00000185222.9	TCEAL9	76.955	5.883	112.492	4.043	0.686	4.088	4.4e-5	4.2e-4
ENSG00000062822.13	POLD1	33.42	2.04	49.109	4.043	0.668	4.073	4.6e-5	4.5e-4
ENSG00000228964.10	HLA-B	173.209	14.397	252.616	4.042	0.742	3.613	3.0e-4	0.002
ENSG00000106484.15	MEST	27.806	1.546	40.936	4.042	1.299	0.832	0.405	0.777
ENSG00000171310.10	CHST11	11.792	0.131	17.622	4.041	0.875	5.953	2.6e-9	5.9e-8
ENSG00000228224.3	NACAP1	11.948	0.145	17.85	4.041	1.424	4.033	5.5e-5	5.2e-4
ENSG00000102802.9	MEDAG	19.575	0.821	28.952	4.04	1.494	0.237	0.813	0.989
ENSG00000171700.13	RGS19	18.006	0.685	26.666	4.038	0.934	3.394	6.9e-4	0.005
ENSG00000139263.11	LRIG3	22.494	1.083	33.199	4.037	0.704	4.785	1.7e-6	2.3e-5
ENSG00000154237.12	LRRK1	35.59	2.248	52.261	4.036	0.863	4.304	1.7e-5	1.8e-4
ENSG00000234882.1	EIF3EP1	12.275	0.179	18.323	4.035	1.442	3.797	1.5e-4	0.001
ENSG00000100767.16	PAPLN	15.929	0.505	23.64	4.033	0.855	6.092	1.1e-9	2.6e-8
ENSG00000117385.15	P3H1	35.284	2.227	51.813	4.033	0.658	3.893	9.9e-5	8.9e-4
ENSG00000079101.16	CLUL1	10.541	0.028	15.797	4.03	2.315	1.603	0.109	0.318
ENSG00000176393.10	RNPEP	68.791	5.235	100.569	4.026	0.564	3.866	1.1e-4	9.7e-4
ENSG00000049089.14	COL9A2	10.724	0.048	16.062	4.026	1.233	5.517	3.5e-8	6.5e-7
ENSG00000181511.5	AC011890.1	10.185	0	15.277	4.025	3.513	1.517	0.129	0.361
ENSG00000167972.13	ABCA3	28.095	1.602	41.341	4.024	0.626	5.045	4.5e-7	6.9e-6
ENSG00000215788.9	TNFRSF25	22.306	1.086	32.916	4.023	0.717	5.336	9.5e-8	1.7e-6
ENSG00000170779.10	CDCA4	11.81	0.147	17.641	4.022	0.924	6.083	1.2e-9	2.8e-8
ENSG00000101017.13	CD40	71.598	5.515	104.64	4.019	0.604	5.011	5.4e-7	8.1e-6
ENSG00000080986.12	NDC80	13.634	0.314	20.294	4.019	1.112	5.182	2.2e-7	3.6e-6
ENSG00000168685.14	IL7R	10.921	0.07	16.347	4.018	1.685	1.503	0.133	0.369
ENSG00000104998.3	IL27RA	19.554	0.846	28.908	4.018	0.665	5.559	2.7e-8	5.2e-7
ENSG00000214063.10	TSPAN4	96.463	7.774	140.808	4.014	0.591	4.507	6.6e-6	7.8e-5
ENSG00000235712.10	RXRB	10.106	0	15.159	4.014	2.879	2.143	0.032	0.123
ENSG00000167004.12	PDIA3	244.321	21.112	355.926	4.013	0.528	5.241	1.6e-7	2.7e-6
ENSG00000282230.1	ADAM9	35.299	2.272	51.813	4.013	0.644	4.911	9.1e-7	1.3e-5
ENSG00000130164.13	LDLR	24.946	1.34	36.749	4.012	0.611	5.458	4.8e-8	8.8e-7
ENSG00000073792.15	IGF2BP2	34.914	2.244	51.25	4.01	0.598	5.612	2.0e-8	3.9e-7
ENSG00000154639.18	CXADR	11.906	0.166	17.776	4.009	0.952	5.557	2.7e-8	5.2e-7
ENSG00000276206.1	AC012314.10	10.044	0	15.066	4.006	4.271	0.984	0.325	0.687
ENSG00000162039.15	MEIOB	13.804	0.342	20.536	4.005	1.057	4.618	3.9e-6	4.8e-5
ENSG00000091127.13	PUS7	39.091	2.634	57.32	4.004	0.666	4.03	5.6e-5	5.3e-4
ENSG00000256061.7	DNAAF4	10.618	0.054	15.901	4.003	1.657	4.293	1.8e-5	1.9e-4
ENSG00000108106.13	UBE2S	132.559	11.118	193.28	4.003	0.584	4.35	1.4e-5	1.5e-4
ENSG00000205744.9	DENND1C	10.022	0	15.033	4.003	2.319	3.83	1.3e-4	0.001
ENSG00000213290.4	PGK1P2	10.709	0.066	16.031	3.998	1.943	3.467	5.3e-4	0.004
ENSG00000101670.11	LIPG	12.382	0.219	18.464	3.997	0.709	6.269	3.6e-10	9.3e-9
ENSG00000137745.11	MMP13	9.977	0	14.965	3.997	4.206	2.319	0.02	0.086
ENSG00000116337.15	AMPD2	34.846	2.268	51.135	3.996	0.649	6.288	3.2e-10	8.3e-9
ENSG00000168461.12	RAB31	37.359	2.504	54.787	3.993	0.601	6.557	5.5e-11	1.6e-9
ENSG00000133048.12	CHI3L1	13.455	0.321	20.022	3.992	1.406	2.926	0.003	0.02
ENSG00000145386.9	CCNA2	11.006	0.098	16.461	3.992	0.973	6.207	5.4e-10	1.3e-8
ENSG00000135750.14	KCNK1	10.653	0.065	15.947	3.992	1.294	4.932	8.2e-7	1.2e-5
ENSG00000183742.12	MACC1	10.44	0.046	15.637	3.992	1.02	7.58	3.4e-14	1.4e-12
ENSG00000174938.14	SEZ6L2	11.144	0.112	16.66	3.989	0.908	6.337	2.3e-10	6.1e-9
ENSG00000237418.1	AC069257.2	9.917	0	14.875	3.989	5.638	0.566	0.571	0.916
ENSG00000149485.18	FADS1	19.797	0.905	29.243	3.988	0.594	5.948	2.7e-9	6.1e-8
ENSG00000143476.17	DTL	10.292	0.036	15.42	3.986	1.227	5.882	4.1e-9	8.8e-8
ENSG00000120802.13	TMPO	69.909	5.512	102.108	3.985	0.57	5.582	2.4e-8	4.6e-7
ENSG00000232024.2	LSM12P1	9.884	0	14.826	3.984	2.543	2.904	0.004	0.021
ENSG00000160781.15	PAQR6	13.487	0.332	20.065	3.984	0.874	5.042	4.6e-7	7.0e-6
ENSG00000066117.14	SMARCD1	67.745	5.329	98.953	3.981	0.558	5.109	3.2e-7	5.1e-6
ENSG00000258284.1	POLR2KP1	9.861	0	14.792	3.981	5.277	0.637	0.524	0.875
ENSG00000160211.16	G6PD	22.823	1.194	33.637	3.98	0.741	5.095	3.5e-7	5.4e-6
ENSG00000026103.21	FAS	42.963	3.054	62.917	3.979	0.611	5.238	1.6e-7	2.7e-6
ENSG00000169908.11	TM4SF1	354.057	31.778	515.196	3.977	0.527	5.083	3.7e-7	5.8e-6
ENSG00000135476.11	ESPL1	9.822	0	14.733	3.976	2.131	5.27	1.4e-7	2.3e-6
ENSG00000144583.4	MARCH4	9.818	0	14.727	3.975	2.133	5.186	2.2e-7	3.5e-6
ENSG00000168071.21	CCDC88B	12.479	0.246	18.596	3.975	0.837	5.375	7.7e-8	1.4e-6
ENSG00000170004.16	CHD3	41.772	2.964	61.177	3.971	0.557	4.648	3.4e-6	4.2e-5
ENSG00000204434.5	POTEKP	9.767	0	14.65	3.968	2.282	4.553	5.3e-6	6.4e-5
ENSG00000197555.9	SIPA1L1	18.009	0.766	26.63	3.967	0.668	4.547	5.4e-6	6.5e-5
ENSG00000135916.15	ITM2C	89.599	7.42	130.689	3.967	0.923	0.864	0.388	0.765
ENSG00000108518.7	PFN1	1089.74	100.434	1584.4	3.966	0.532	5.082	3.7e-7	5.8e-6
ENSG00000203780.10	FANK1	11.159	0.132	16.673	3.965	1.717	3.687	2.3e-4	0.002
ENSG00000255987.1	TOMM20P2	9.724	0	14.587	3.962	2.917	2.188	0.029	0.113
ENSG00000143850.14	PLEKHA6	15.06	0.501	22.339	3.959	0.71	4.151	3.3e-5	3.3e-4
ENSG00000018408.14	WWTR1	79.655	6.545	116.209	3.957	0.63	4.511	6.4e-6	7.6e-5
ENSG00000104327.7	CALB1	12.69	0.283	18.894	3.954	0.996	5.368	8.0e-8	1.4e-6
ENSG00000141968.7	VAV1	12.412	0.261	18.487	3.949	1.109	3.619	3.0e-4	0.002
ENSG00000243853.1	ALDH7A1P3	9.624	0	14.437	3.948	3.279	1.738	0.082	0.258
ENSG00000071539.13	TRIP13	10.974	0.128	16.397	3.947	0.93	5.928	3.1e-9	6.8e-8
ENSG00000171793.13	CTPS1	51.294	3.929	74.977	3.946	0.614	3.426	6.1e-4	0.004
ENSG00000283486.2	FAM95C	11.784	0.206	17.574	3.946	0.902	5.445	5.2e-8	9.4e-7
ENSG00000183098.10	GPC6	11.177	0.148	16.691	3.945	0.724	7.463	8.5e-14	3.4e-12
ENSG00000169607.12	CKAP2L	9.733	0.014	14.592	3.942	1.586	5.286	1.3e-7	2.1e-6
ENSG00000169231.13	THBS3	47.58	3.595	69.572	3.941	0.6	5.333	9.7e-8	1.7e-6
ENSG00000124225.15	PMEPA1	95.66	8.157	139.412	3.939	0.527	5.398	6.7e-8	1.2e-6
ENSG00000134291.11	TMEM106C	81.667	6.832	119.084	3.938	0.591	5.286	1.3e-7	2.1e-6
ENSG00000197136.4	PCNX3	24.272	1.396	35.71	3.938	0.593	4.57	4.9e-6	5.9e-5
ENSG00000214362.2	RPS3AP36	9.547	0	14.321	3.937	2.502	3.227	0.001	0.008
ENSG00000118520.14	ARG1	10.078	0.052	15.091	3.935	2.113	3.314	9.2e-4	0.006
ENSG00000277443.2	MARCKS	62.831	5.077	91.707	3.931	0.678	4.263	2.0e-5	2.1e-4
ENSG00000147324.10	MFHAS1	31.352	2.08	45.988	3.931	0.565	5.733	9.9e-9	2.0e-7
ENSG00000234078.10	DDR1	12.781	0.312	19.015	3.931	1.75	3.7	2.2e-4	0.002
ENSG00000137819.13	PAQR5	10.339	0.081	15.469	3.93	0.846	7.21	5.6e-13	2.1e-11
ENSG00000113657.12	DPYSL3	260.523	23.929	378.82	3.929	0.538	5.01	5.5e-7	8.2e-6
ENSG00000130475.14	FCHO1	10.536	0.101	15.754	3.928	1.642	4.395	1.1e-5	1.2e-4
ENSG00000270381.1	AL138963.2	9.461	0	14.191	3.925	5.569	0.701	0.484	0.859
ENSG00000240204.2	SMKR1	9.457	0	14.186	3.925	2.36	3.41	6.5e-4	0.005
ENSG00000198901.13	PRC1	32.105	2.167	47.075	3.924	0.7	6.653	2.9e-11	8.6e-10
ENSG00000198959.11	TGM2	82.248	6.966	119.889	3.924	0.613	4.662	3.1e-6	3.9e-5
ENSG00000140332.15	TLE3	28.002	1.776	41.116	3.923	0.655	3.09	0.002	0.012
ENSG00000106976.20	DNM1	22.978	1.296	33.819	3.923	0.719	4.859	1.2e-6	1.6e-5
ENSG00000101911.12	PRPS2	18.104	0.829	26.742	3.923	0.841	5.168	2.4e-7	3.8e-6
ENSG00000088298.12	EDEM2	23.807	1.376	35.023	3.922	0.66	5.029	4.9e-7	7.4e-6
ENSG00000163762.6	TM4SF18	47.99	3.694	70.137	3.922	0.689	3.816	1.4e-4	0.001
ENSG00000125637.15	PSD4	9.732	0.029	14.583	3.921	1.054	6.362	2.0e-10	5.3e-9
ENSG00000185842.15	DNAH14	20.289	1.041	29.913	3.921	0.796	4.845	1.3e-6	1.8e-5
ENSG00000134755.14	DSC2	10.55	0.108	15.771	3.92	0.801	6.545	5.9e-11	1.7e-9
ENSG00000136205.16	TNS3	52.819	4.164	77.147	3.92	0.582	5.183	2.2e-7	3.5e-6
ENSG00000144134.18	RABL2A	27.146	1.704	39.868	3.918	0.739	5.073	3.9e-7	6.0e-6
ENSG00000180190.11	TDRP	14.092	0.45	20.913	3.918	0.809	3.945	8.0e-5	7.3e-4
ENSG00000074842.7	MYDGF	60.553	4.914	88.372	3.918	0.65	4.216	2.5e-5	2.6e-4
ENSG00000115252.18	PDE1A	14.645	0.503	21.716	3.917	0.863	4.754	2.0e-6	2.6e-5
ENSG00000167552.13	TUBA1A	124.035	11.015	180.545	3.917	0.561	5.083	3.7e-7	5.8e-6
ENSG00000153815.16	CMIP	25.184	1.52	37.016	3.915	0.619	4.503	6.7e-6	7.9e-5
ENSG00000260860.2	AC126773.3	9.391	0	14.087	3.915	2.443	3.417	6.3e-4	0.005
ENSG00000109586.11	GALNT7	16.15	0.651	23.899	3.915	0.657	5.871	4.3e-9	9.3e-8
ENSG00000059758.7	CDK17	60.933	4.962	88.919	3.915	0.554	5.436	5.4e-8	9.9e-7
ENSG00000175832.12	ETV4	13.337	0.383	19.814	3.912	0.857	4.744	2.1e-6	2.8e-5
ENSG00000251493.4	FOXD1	10.625	0.123	15.876	3.909	1.062	4.676	2.9e-6	3.7e-5
ENSG00000178596.10	GAPDHP29	9.331	0	13.997	3.907	2.413	3.54	4.0e-4	0.003
ENSG00000085514.15	PILRA	23.092	1.334	33.972	3.905	0.862	4.204	2.6e-5	2.7e-4
ENSG00000130827.6	PLXNA3	19.736	1.01	29.1	3.905	0.627	3.816	1.4e-4	0.001
ENSG00000154760.13	SLFN13	11.617	0.223	17.313	3.904	0.775	6.628	3.4e-11	1.0e-9
ENSG00000149131.15	SERPING1	204.181	18.895	296.825	3.904	0.733	1.685	0.092	0.281
ENSG00000116641.17	DOCK7	36.87	2.674	53.968	3.903	0.607	2.932	0.003	0.019
ENSG00000119681.11	LTBP2	24.149	1.44	35.503	3.903	0.548	5.145	2.7e-7	4.3e-6
ENSG00000174238.14	PITPNA	97.631	8.57	142.161	3.903	0.624	2.535	0.011	0.053
ENSG00000013810.18	TACC3	23.926	1.426	35.175	3.899	0.722	5.348	8.9e-8	1.6e-6
ENSG00000161013.16	MGAT4B	137.164	12.456	199.519	3.897	0.543	4.225	2.4e-5	2.5e-4
ENSG00000228081.2	AC092810.2	9.268	0	13.901	3.897	3.11	1.85	0.064	0.214
ENSG00000112977.15	DAP	27.448	1.771	40.287	3.897	0.629	5.123	3.0e-7	4.8e-6
ENSG00000156755.10	IGKV1OR-2	9.248	0	13.872	3.895	3.196	1.711	0.087	0.27
ENSG00000183943.5	PRKX	21.999	1.245	32.377	3.894	0.778	4.259	2.1e-5	2.2e-4
ENSG00000114993.16	RTKN	54.534	4.425	79.589	3.893	0.62	3.799	1.5e-4	0.001
ENSG00000075223.13	SEMA3C	88.741	7.766	129.229	3.893	0.597	4.491	7.1e-6	8.3e-5
ENSG00000145860.11	RNF145	47.5	3.743	69.379	3.891	0.577	4.416	1.0e-5	1.1e-4
ENSG00000111229.15	ARPC3	332.496	31.626	482.932	3.891	0.533	4.851	1.2e-6	1.7e-5
ENSG00000118263.14	KLF7	20.039	1.059	29.529	3.89	0.655	2.593	0.01	0.046
ENSG00000062038.13	CDH3	9.471	0.025	14.194	3.89	1.619	4.537	5.7e-6	6.8e-5
ENSG00000198889.4	DCAF12L1	9.213	0	13.82	3.889	2.182	4.793	1.6e-6	2.2e-5
ENSG00000118640.10	VAMP8	92.304	8.138	134.387	3.889	0.63	4.392	1.1e-5	1.3e-4
ENSG00000134531.9	EMP1	120.421	10.892	175.186	3.889	0.554	4.736	2.2e-6	2.9e-5
ENSG00000150782.11	IL18	93.713	8.279	136.431	3.889	0.574	4.819	1.4e-6	2.0e-5
ENSG00000078098.13	FAP	34.11	2.442	49.943	3.888	1.127	1.099	0.272	0.611
ENSG00000035687.9	ADSS	39.755	2.996	58.135	3.887	0.574	4.884	1.0e-6	1.5e-5
ENSG00000188112.8	C6orf132	9.198	0	13.798	3.887	2.165	4.637	3.5e-6	4.4e-5
ENSG00000101871.14	MID1	13.583	0.431	20.16	3.886	0.65	6.223	4.9e-10	1.2e-8
ENSG00000096696.13	DSP	9.44	0.024	14.148	3.886	1.021	7.691	1.5e-14	6.3e-13
ENSG00000100092.21	SH3BP1	9.671	0.048	14.483	3.885	1.314	5.011	5.4e-7	8.1e-6
ENSG00000269190.5	FBXO17	22.631	1.321	33.285	3.885	0.677	5.039	4.7e-7	7.1e-6
ENSG00000112414.14	ADGRG6	11.644	0.242	17.345	3.884	0.73	6.263	3.8e-10	9.6e-9
ENSG00000166451.13	CENPN	23.266	1.384	34.207	3.884	0.734	3.246	0.001	0.008
ENSG00000206147.5	RPL23AP57	9.171	0	13.756	3.883	3.12	2.14	0.032	0.124
ENSG00000167513.8	CDT1	9.168	0	13.751	3.883	2.161	4.631	3.6e-6	4.5e-5
ENSG00000170689.9	HOXB9	9.163	0	13.744	3.882	2.157	4.675	2.9e-6	3.7e-5
ENSG00000119408.16	NEK6	20.781	1.146	30.599	3.88	0.919	1.267	0.205	0.503
ENSG00000276368.1	HIST1H2AJ	9.151	0	13.726	3.88	3.015	1.973	0.048	0.171
ENSG00000116285.12	ERRFI1	53.574	4.378	78.172	3.88	0.551	5.278	1.3e-7	2.2e-6
ENSG00000088826.17	SMOX	22.695	1.335	33.375	3.88	0.874	3.831	1.3e-4	0.001
ENSG00000127990.16	SGCE	45.098	3.544	65.875	3.88	0.639	4.051	5.1e-5	4.9e-4
ENSG00000141458.12	NPC1	64.066	5.413	93.392	3.88	0.583	4.833	1.3e-6	1.8e-5
ENSG00000168078.9	PBK	10.498	0.133	15.68	3.879	1.114	5.212	1.9e-7	3.1e-6
ENSG00000090889.11	KIF4A	9.752	0.06	14.599	3.879	0.968	6.721	1.8e-11	5.5e-10
ENSG00000239264.8	TXNDC5	85.404	7.521	124.346	3.879	0.536	4.971	6.7e-7	9.8e-6
ENSG00000244730.1	AC139451.1	9.133	0	13.699	3.878	3.326	1.634	0.102	0.304
ENSG00000161179.13	YDJC	15.159	0.598	22.439	3.874	0.859	4.48	7.4e-6	8.7e-5
ENSG00000111445.13	RFC5	28.57	1.925	41.893	3.874	0.649	4.971	6.7e-7	9.8e-6
ENSG00000129911.8	KLF16	20.722	1.152	30.507	3.872	0.682	4.713	2.4e-6	3.2e-5
ENSG00000236235.1	AP000542.1	9.089	0	13.634	3.871	3.109	1.807	0.071	0.23
ENSG00000140464.19	PML	57.451	4.797	83.778	3.87	0.576	5.022	5.1e-7	7.7e-6
ENSG00000156011.16	PSD3	11.857	0.276	17.648	3.869	0.624	6.998	2.6e-12	9.0e-11
ENSG00000236418.8	HLA-DQA1	45.375	3.604	66.261	3.869	0.643	-2.411	0.016	0.07
ENSG00000112378.11	PERP	19.064	0.993	28.099	3.868	0.681	4.991	6.0e-7	8.9e-6
ENSG00000135525.18	MAP7	9.716	0.065	14.542	3.867	0.956	6.646	3.0e-11	8.9e-10
ENSG00000156711.16	MAPK13	17.313	0.821	25.558	3.866	0.828	5.112	3.2e-7	5.0e-6
ENSG00000159214.12	CCDC24	12.28	0.322	18.26	3.865	1.08	4.493	7.0e-6	8.2e-5
ENSG00000198715.11	GLMP	37.927	2.874	55.454	3.865	0.652	5.015	5.3e-7	8.0e-6
ENSG00000254087.7	LYN	13.569	0.451	20.129	3.865	0.802	3.513	4.4e-4	0.003
ENSG00000070882.12	OSBPL3	47.683	3.849	69.601	3.864	0.542	5.256	1.5e-7	2.5e-6
ENSG00000197696.9	NMB	16.724	0.768	24.703	3.862	0.932	3.933	8.4e-5	7.7e-4
ENSG00000167105.7	TMEM92	9.012	0	13.519	3.86	2.244	3.871	1.1e-4	9.6e-4
ENSG00000114346.13	ECT2	22.582	1.358	33.194	3.858	0.655	6.958	3.5e-12	1.2e-10
ENSG00000104635.13	SLC39A14	55.792	4.684	81.346	3.857	0.596	4.992	6.0e-7	8.9e-6
ENSG00000102271.13	KLHL4	11.307	0.232	16.845	3.856	0.932	5.043	4.6e-7	7.0e-6
ENSG00000165359.15	INTS6L	15.152	0.617	22.42	3.856	0.682	6.156	7.5e-10	1.8e-8
ENSG00000115884.10	SDC1	11.002	0.202	16.401	3.855	1.473	4.377	1.2e-5	1.3e-4
ENSG00000146232.16	NFKBIE	13.475	0.451	19.988	3.855	0.772	4.776	1.8e-6	2.4e-5
ENSG00000005884.17	ITGA3	48.759	3.989	71.145	3.854	0.549	4.567	4.9e-6	6.0e-5
ENSG00000113583.7	C5orf15	80.319	7.154	116.902	3.854	0.626	4.084	4.4e-5	4.3e-4
ENSG00000237344.7	PBX2	9.076	0.012	13.608	3.852	1.614	4.977	6.4e-7	9.5e-6
ENSG00000136044.11	APPL2	70.072	6.137	102.04	3.852	0.594	4.358	1.3e-5	1.4e-4
ENSG00000205302.6	SNX2	147.432	13.91	214.193	3.851	0.688	1.183	0.237	0.557
ENSG00000001036.13	FUCA2	43.227	3.444	63.119	3.851	0.604	4.74	2.1e-6	2.8e-5
ENSG00000178078.11	STAP2	34.625	2.585	50.646	3.849	0.753	4.644	3.4e-6	4.3e-5
ENSG00000259120.2	SMIM6	8.924	0	13.385	3.847	2.369	3.402	6.7e-4	0.005
ENSG00000235125.8	NFKBIL1	8.922	0	13.383	3.846	2.213	4.105	4.0e-5	4.0e-4
ENSG00000213370.3	RANP6	8.914	0	13.371	3.845	2.594	2.897	0.004	0.021
ENSG00000285150.1	AC140062.1	8.914	0	13.371	3.845	2.398	3.194	0.001	0.009
ENSG00000077713.18	SLC25A43	13.043	0.417	19.356	3.845	0.822	4.907	9.2e-7	1.3e-5
ENSG00000067798.15	NAV3	22.46	1.367	33.006	3.845	0.672	7.166	7.7e-13	2.8e-11
ENSG00000159176.13	CSRP1	106.062	9.821	154.182	3.842	0.574	2.321	0.02	0.086
ENSG00000144959.9	NCEH1	21.099	1.234	31.031	3.842	0.661	4.94	7.8e-7	1.1e-5
ENSG00000111321.10	LTBR	98.668	9.088	143.458	3.84	0.547	4.472	7.7e-6	9.0e-5
ENSG00000139182.13	CLSTN3	26.425	1.777	38.749	3.84	0.655	6.164	7.1e-10	1.7e-8
ENSG00000086506.2	HBQ1	11.3	0.246	16.828	3.839	1.988	2.411	0.016	0.07
ENSG00000173588.14	CEP83	33.168	2.464	48.52	3.838	0.658	3.263	0.001	0.007
ENSG00000136490.8	LIMD2	16.419	0.767	24.246	3.837	1.013	3.279	0.001	0.007
ENSG00000188158.14	NHS	9.465	0.062	14.167	3.836	0.847	6.572	5.0e-11	1.4e-9
ENSG00000073756.11	PTGS2	12.257	0.346	18.212	3.836	3.512	1.317	0.188	0.473
ENSG00000108829.9	LRRC59	58.148	5.016	84.714	3.833	0.545	4.954	7.3e-7	1.1e-5
ENSG00000109743.10	BST1	14.375	0.565	21.28	3.832	1.032	3.19	0.001	0.009
ENSG00000178921.13	PFAS	16.512	0.784	24.377	3.831	0.661	4.481	7.4e-6	8.6e-5
ENSG00000169896.16	ITGAM	20.269	1.167	29.82	3.83	0.887	4.683	2.8e-6	3.6e-5
ENSG00000140104.13	CLBA1	12.003	0.325	17.842	3.83	0.828	4.963	6.9e-7	1.0e-5
ENSG00000166508.17	MCM7	134.601	12.839	195.483	3.828	0.536	5.158	2.5e-7	4.0e-6
ENSG00000002079.14	MYH16	8.795	0	13.192	3.827	2.158	4.67	3.0e-6	3.8e-5
ENSG00000123131.12	PRDX4	165.176	15.985	239.772	3.825	0.561	4.141	3.5e-5	3.4e-4
ENSG00000039560.13	RAI14	13.822	0.515	20.476	3.825	0.704	6.622	3.5e-11	1.0e-9
ENSG00000147155.10	EBP	42.073	3.406	61.406	3.824	0.734	3.654	2.6e-4	0.002
ENSG00000090971.4	NAT14	17.593	0.903	25.938	3.824	0.83	3.995	6.5e-5	6.0e-4
ENSG00000112981.4	NME5	10.449	0.174	15.586	3.821	1.45	3.465	5.3e-4	0.004
ENSG00000138160.5	KIF11	9.394	0.067	14.058	3.819	0.898	7.044	1.9e-12	6.5e-11
ENSG00000187546.13	AGMO	10.215	0.153	15.245	3.816	1.018	5.078	3.8e-7	5.9e-6
ENSG00000038427.15	VCAN	15.698	0.717	23.188	3.816	1.149	1.711	0.087	0.27
ENSG00000205116.3	TMEM88B	8.706	0	13.059	3.813	2.813	2.287	0.022	0.092
ENSG00000179029.14	TMEM107	15.188	0.67	22.447	3.812	0.967	3.502	4.6e-4	0.003
ENSG00000112984.11	KIF20A	9.141	0.046	13.688	3.811	1.248	5.368	8.0e-8	1.4e-6
ENSG00000134308.13	YWHAQ	165.41	16.172	240.03	3.811	0.526	4.625	3.7e-6	4.7e-5
ENSG00000124766.6	SOX4	21.568	1.329	31.688	3.811	0.566	5.699	1.2e-8	2.4e-7
ENSG00000205436.7	EXOC3L4	9.806	0.117	14.65	3.809	1.753	3.373	7.4e-4	0.005
ENSG00000107566.13	ERLIN1	23.444	1.533	34.399	3.805	0.591	4.284	1.8e-5	2.0e-4
ENSG00000087076.8	HSD17B14	12.94	0.445	19.187	3.804	1.048	4.205	2.6e-5	2.7e-4
ENSG00000102699.5	PARP4	23.416	1.533	34.358	3.803	0.606	5.02	5.2e-7	7.8e-6
ENSG00000227688.2	HNRNPA3P2	8.612	0	12.918	3.799	2.611	2.892	0.004	0.021
ENSG00000277424.4	HMOX2	73.27	6.728	106.54	3.799	0.593	3.874	1.1e-4	9.5e-4
ENSG00000161638.10	ITGA5	69.735	6.367	101.419	3.797	0.642	3.728	1.9e-4	0.002
ENSG00000274911.1	AL627230.2	11.558	0.308	17.183	3.797	1.732	2.586	0.01	0.047
ENSG00000181588.16	MEX3D	15.241	0.692	22.516	3.796	0.715	4.964	6.9e-7	1.0e-5
ENSG00000178719.16	GRINA	210.315	21.041	304.953	3.795	0.715	2.202	0.028	0.109
ENSG00000173653.7	RCE1	28.045	2.03	41.052	3.795	0.726	2.946	0.003	0.018
ENSG00000116793.15	PHTF1	21.201	1.318	31.142	3.793	0.666	4.36	1.3e-5	1.4e-4
ENSG00000101336.13	HCK	10.982	0.251	16.347	3.793	1.091	4.192	2.8e-5	2.8e-4
ENSG00000061656.9	SPAG4	15.36	0.71	22.685	3.792	1.031	3.058	0.002	0.013
ENSG00000087253.12	LPCAT2	13.183	0.483	19.534	3.792	0.917	0.863	0.388	0.765
ENSG00000151693.10	ASAP2	20.392	1.238	29.969	3.791	0.659	5.111	3.2e-7	5.0e-6
ENSG00000227500.9	SCAMP4	45.647	3.88	66.53	3.791	0.636	3.922	8.8e-5	8.0e-4
ENSG00000185201.16	IFITM2	341.019	34.794	494.132	3.79	0.905	2.91	0.004	0.02
ENSG00000111196.9	MAGOHB	40.935	3.389	59.708	3.79	0.693	4.401	1.1e-5	1.2e-4
ENSG00000142867.12	BCL10	22.561	1.467	33.108	3.789	0.618	4.825	1.4e-6	1.9e-5
ENSG00000197358.9	BNIP3P1	17.279	0.914	25.462	3.789	1.373	1.133	0.257	0.588
ENSG00000046604.12	DSG2	17.921	0.982	26.391	3.789	0.647	5.136	2.8e-7	4.5e-6
ENSG00000187608.8	ISG15	33.456	2.612	48.878	3.788	0.918	3.048	0.002	0.014
ENSG00000115163.14	CENPA	8.536	0	12.804	3.787	2.247	3.863	1.1e-4	9.8e-4
ENSG00000106462.10	EZH2	18.207	1.019	26.801	3.783	0.71	5.246	1.6e-7	2.6e-6
ENSG00000128602.9	SMO	15.916	0.78	23.484	3.782	0.645	4.865	1.1e-6	1.6e-5
ENSG00000204852.15	TCTN1	55.973	4.997	81.462	3.781	0.606	4.357	1.3e-5	1.5e-4
ENSG00000162777.16	DENND2D	9.738	0.131	14.542	3.781	1.343	4.139	3.5e-5	3.5e-4
ENSG00000118855.18	MFSD1	54.897	4.887	79.902	3.78	0.635	1.77	0.077	0.245
ENSG00000234062.7	AL390879.1	14.188	0.6	20.982	3.78	1.04	3.538	4.0e-4	0.003
ENSG00000262141.1	AC040162.2	8.492	0	12.738	3.78	5.548	0.591	0.554	0.901
ENSG00000125459.14	MSTO1	32.164	2.496	46.998	3.779	0.703	4.009	6.1e-5	5.7e-4
ENSG00000257905.1	AC004486.1	8.483	0	12.724	3.779	4.328	0.969	0.333	0.697
ENSG00000241685.9	ARPC1A	159.136	15.899	230.754	3.778	0.549	4.319	1.6e-5	1.7e-4
ENSG00000177542.10	SLC25A22	18.571	1.067	27.322	3.776	0.855	5.754	8.7e-9	1.8e-7
ENSG00000102934.9	PLLP	19.503	1.166	28.672	3.776	0.734	2.366	0.018	0.077
ENSG00000116489.12	CAPZA1	63.14	5.784	91.817	3.774	0.545	4.606	4.1e-6	5.0e-5
ENSG00000168778.11	TCTN2	12.111	0.388	17.973	3.773	0.727	5.612	2.0e-8	3.9e-7
ENSG00000231357.1	AC006028.1	8.42	0	12.63	3.769	3.035	1.978	0.048	0.17
ENSG00000233111.1	RAB1C	8.395	0	12.593	3.765	2.641	2.752	0.006	0.031
ENSG00000169403.11	PTAFR	9.293	0.099	13.89	3.76	0.933	6.145	8.0e-10	1.9e-8
ENSG00000142920.16	AZIN2	16.746	0.895	24.671	3.76	1.064	2.609	0.009	0.044
ENSG00000168488.18	ATXN2L	96.999	9.481	140.758	3.758	0.535	3.721	2.0e-4	0.002
ENSG00000185215.8	TNFAIP2	134.365	13.497	194.799	3.756	0.642	4.018	5.9e-5	5.5e-4
ENSG00000123352.17	SPATS2	57.125	5.227	83.074	3.755	0.587	3.917	9.0e-5	8.1e-4
ENSG00000100479.12	POLE2	19.997	1.26	29.365	3.748	1.11	3.535	4.1e-4	0.003
ENSG00000224864.4	AC011447.1	8.283	0	12.425	3.747	2.863	2.173	0.03	0.116
ENSG00000173715.16	C11orf80	17.004	0.94	25.036	3.746	0.986	4.963	7.0e-7	1.0e-5
ENSG00000087903.12	RFX2	11.327	0.329	16.826	3.746	0.964	3.507	4.5e-4	0.003
ENSG00000182632.15	CCNYL2	8.641	0.04	12.941	3.744	1.223	5.581	2.4e-8	4.6e-7
ENSG00000213787.3	RPL7AP38	8.264	0	12.396	3.744	2.562	3.104	0.002	0.012
ENSG00000102100.15	SLC35A2	29.898	2.336	43.679	3.743	0.66	3.969	7.2e-5	6.6e-4
ENSG00000139343.10	SNRPF	67.066	6.352	97.422	3.743	0.588	4.345	1.4e-5	1.5e-4
ENSG00000268222.1	EEF1A1P7	8.256	0	12.384	3.742	2.361	3.823	1.3e-4	0.001
ENSG00000175115.11	PACS1	61.949	5.803	90.021	3.742	0.581	3.796	1.5e-4	0.001
ENSG00000158286.12	RNF207	22.354	1.525	32.769	3.741	0.718	3.237	0.001	0.008
ENSG00000126787.12	DLGAP5	8.236	0	12.354	3.739	2.173	4.61	4.0e-6	4.9e-5
ENSG00000227376.1	FTH1P16	8.234	0	12.351	3.739	2.656	2.616	0.009	0.044
ENSG00000177084.16	POLE	22.665	1.563	33.216	3.739	0.578	4.347	1.4e-5	1.5e-4
ENSG00000130309.10	COLGALT1	47.968	4.31	69.797	3.737	0.571	4.294	1.8e-5	1.9e-4
ENSG00000139546.10	TARBP2	40.636	3.515	59.197	3.737	0.628	3.581	3.4e-4	0.003
ENSG00000139514.12	SLC7A1	10.43	0.243	15.524	3.733	0.716	6.542	6.1e-11	1.7e-9
ENSG00000129667.12	RHBDF2	45.076	4.01	65.609	3.733	0.584	4.624	3.8e-6	4.7e-5
ENSG00000135862.5	LAMC1	148.123	15.217	214.577	3.733	0.563	4.74	2.1e-6	2.8e-5
ENSG00000117519.15	CNN3	93.379	9.268	135.435	3.732	0.555	4.197	2.7e-5	2.8e-4
ENSG00000182472.8	CAPN12	11.345	0.344	16.846	3.731	1.118	4.521	6.2e-6	7.3e-5
ENSG00000118503.14	TNFAIP3	34.474	2.862	50.28	3.731	0.581	5.432	5.6e-8	1.0e-6
ENSG00000162062.14	TEDC2	8.577	0.045	12.844	3.728	1.703	3.704	2.1e-4	0.002
ENSG00000142731.10	PLK4	10.197	0.223	15.184	3.727	1.193	4.18	2.9e-5	3.0e-4
ENSG00000128242.12	GAL3ST1	20.507	1.351	30.085	3.725	1.019	3.363	7.7e-4	0.005
ENSG00000181218.5	HIST3H2A	9.98	0.202	14.869	3.723	1.494	3.294	9.9e-4	0.007
ENSG00000226086.5	EIF3LP3	8.13	0	12.195	3.722	2.543	3.14	0.002	0.011
ENSG00000180340.6	FZD2	9.94	0.201	14.81	3.718	0.972	4.925	8.4e-7	1.2e-5
ENSG00000039068.18	CDH1	8.729	0.069	13.06	3.718	1.032	6.279	3.4e-10	8.7e-9
ENSG00000197930.12	ERO1A	34.626	2.914	50.482	3.717	0.564	5.215	1.8e-7	3.0e-6
ENSG00000128692.8	EIF2S2P4	8.092	0	12.138	3.716	2.472	3.378	7.3e-4	0.005
ENSG00000090924.14	PLEKHG2	33.452	2.794	48.781	3.714	0.591	5.927	3.1e-9	6.8e-8
ENSG00000164294.13	GPX8	13.975	0.65	20.638	3.713	0.826	5.117	3.1e-7	4.9e-6
ENSG00000128512.20	DOCK4	27.307	2.123	39.9	3.711	0.58	4.198	2.7e-5	2.8e-4
ENSG00000184117.11	NIPSNAP1	26.488	2.034	38.715	3.711	0.71	5.227	1.7e-7	2.9e-6
ENSG00000139083.10	ETV6	25.679	1.945	37.546	3.71	0.579	3.495	4.7e-4	0.004
ENSG00000261278.1	AC009094.1	8.056	0	12.084	3.71	3.068	2.007	0.045	0.16
ENSG00000091317.7	CMTM6	19.513	1.266	28.636	3.709	0.648	4.677	2.9e-6	3.7e-5
ENSG00000148344.10	PTGES	10.308	0.25	15.336	3.708	1.253	3.79	1.5e-4	0.001
ENSG00000232608.1	TIMM9P2	8.02	0	12.03	3.704	4.084	1.063	0.288	0.635
ENSG00000100290.2	BIK	8.018	0	12.028	3.704	2.313	3.501	4.6e-4	0.003
ENSG00000270149.5	AL591806.3	8.718	0.078	13.037	3.703	1.758	3.987	6.7e-5	6.2e-4
ENSG00000133169.5	BEX1	7.999	0	11.999	3.7	2.569	3.144	0.002	0.01
ENSG00000171711.2	DEFB4A	7.996	0	11.994	3.7	3.489	1.666	0.096	0.289
ENSG00000115956.9	PLEK	11.384	0.379	16.886	3.697	1.152	2.299	0.022	0.09
ENSG00000231300.1	EZH2P1	7.971	0	11.956	3.696	4.526	1.081	0.28	0.623
ENSG00000123374.10	CDK2	36.415	3.173	53.036	3.695	0.606	4.536	5.7e-6	6.9e-5
ENSG00000223825.5	DAZAP2P1	10.476	0.28	15.573	3.694	2.154	2.119	0.034	0.129
ENSG00000006453.13	BAIAP2L1	27.995	2.235	40.874	3.694	0.598	6.139	8.3e-10	2.0e-8
ENSG00000233648.1	AC010095.1	7.945	0	11.918	3.691	5.686	0.545	0.586	0.925
ENSG00000132646.10	PCNA	58.533	5.666	84.967	3.689	0.618	4.058	5.0e-5	4.8e-4
ENSG00000162627.16	SNX7	24.15	1.819	35.316	3.688	0.752	4.385	1.2e-5	1.3e-4
ENSG00000215278.4	RPS7P6	7.914	0	11.872	3.686	2.754	2.571	0.01	0.049
ENSG00000173295.7	FAM86B3P	9.897	0.223	14.734	3.686	1.124	3.977	7.0e-5	6.4e-4
ENSG00000262788.3	UTP4	13.028	0.576	19.254	3.684	1.051	4.92	8.7e-7	1.2e-5
ENSG00000277104.4	TADA2A	10.689	0.315	15.876	3.682	1.346	4.104	4.1e-5	4.0e-4
ENSG00000280839.2	CES5AP1	7.889	0	11.834	3.682	2.712	2.407	0.016	0.071
ENSG00000101307.15	SIRPB1	8.252	0.041	12.357	3.681	1.29	4.853	1.2e-6	1.7e-5
ENSG00000181885.18	CLDN7	9.965	0.236	14.83	3.679	1.324	3.47	5.2e-4	0.004
ENSG00000070404.9	FSTL3	19.107	1.267	28.027	3.679	0.693	4.548	5.4e-6	6.5e-5
ENSG00000147140.15	NONO	293.086	32.174	423.543	3.678	0.573	4.292	1.8e-5	1.9e-4
ENSG00000172890.12	NADSYN1	47.015	4.418	68.313	3.677	0.586	4.76	1.9e-6	2.6e-5
ENSG00000198089.15	SFI1	12.954	0.576	19.143	3.676	0.868	3.179	0.001	0.009
ENSG00000136830.11	FAM129B	36.501	3.237	53.134	3.675	0.556	4.874	1.1e-6	1.5e-5
ENSG00000148926.9	ADM	29.594	2.461	43.161	3.674	0.849	3.252	0.001	0.008
ENSG00000159217.9	IGF2BP1	12.239	0.499	18.109	3.672	0.918	8.272	1.3e-16	7.0e-15
ENSG00000163584.17	RPL22L1	103.914	10.886	150.427	3.671	0.898	2.717	0.007	0.034
ENSG00000137845.14	ADAM10	54.748	5.322	79.46	3.67	0.54	4.379	1.2e-5	1.3e-4
ENSG00000104723.20	TUSC3	25.948	2.058	37.893	3.669	0.763	3.741	1.8e-4	0.002
ENSG00000140575.12	IQGAP1	110.191	11.645	159.464	3.666	0.545	3.746	1.8e-4	0.002
ENSG00000079974.17	RABL2B	18.302	1.196	26.854	3.665	0.757	4.015	5.9e-5	5.6e-4
ENSG00000001630.15	CYP51A1	26.304	2.107	38.402	3.665	0.598	4.708	2.5e-6	3.2e-5
ENSG00000146826.16	C7orf43	25.045	1.965	36.585	3.664	0.792	3.113	0.002	0.011
ENSG00000128713.13	HOXD11	8.337	0.063	12.474	3.664	1.708	3.704	2.1e-4	0.002
ENSG00000127586.16	CHTF18	13.244	0.624	19.555	3.662	0.769	4.3	1.7e-5	1.8e-4
ENSG00000163682.16	RPL9	824.477	93.151	1190.14	3.661	0.528	4.258	2.1e-5	2.2e-4
ENSG00000189046.10	ALKBH2	38.591	3.519	56.127	3.66	0.688	3.648	2.6e-4	0.002
ENSG00000196189.12	SEMA4A	15.021	0.833	22.115	3.657	0.956	2.803	0.005	0.027
ENSG00000100526.19	CDKN3	21.782	1.608	31.869	3.656	0.936	3.59	3.3e-4	0.003
ENSG00000179820.15	MYADM	39.392	3.625	57.275	3.656	0.574	4.706	2.5e-6	3.3e-5
ENSG00000091651.8	ORC6	23.777	1.838	34.747	3.655	0.682	3.651	2.6e-4	0.002
ENSG00000125676.19	THOC2	78.423	8.1	113.584	3.654	0.641	3.247	0.001	0.008
ENSG00000042753.11	AP2S1	372.494	41.832	537.825	3.653	0.66	1.106	0.269	0.607
ENSG00000259706.1	HSP90B2P	8.229	0.058	12.314	3.653	1.461	4.45	8.6e-6	9.9e-5
ENSG00000141522.11	ARHGDIA	199.617	22.01	288.42	3.653	0.531	3.249	0.001	0.008
ENSG00000227183.3	HDGFP1	7.718	0	11.578	3.653	4.421	0.916	0.36	0.729
ENSG00000108774.14	RAB5C	107.837	11.486	156.012	3.653	0.588	4.217	2.5e-5	2.6e-4
ENSG00000074696.12	HACD3	33.317	2.937	48.508	3.652	0.602	4.398	1.1e-5	1.2e-4
ENSG00000149480.6	MTA2	53.206	5.224	77.197	3.651	0.553	4.498	6.9e-6	8.1e-5
ENSG00000130508.10	PXDN	30.944	2.675	45.078	3.648	0.541	5.672	1.4e-8	2.8e-7
ENSG00000167615.16	LENG8	43.422	4.115	63.076	3.647	0.559	6.575	4.9e-11	1.4e-9
ENSG00000167646.13	DNAAF3	8.239	0.064	12.327	3.646	1.415	3.622	2.9e-4	0.002
ENSG00000014138.8	POLA2	23.502	1.826	34.339	3.644	0.681	3.984	6.8e-5	6.3e-4
ENSG00000132199.18	ENOSF1	37.793	3.479	54.95	3.643	0.606	3.791	1.5e-4	0.001
ENSG00000234743.1	EIF5AP4	7.659	0	11.489	3.643	2.999	2.134	0.033	0.126
ENSG00000242457.1	RBBP4P2	7.658	0	11.487	3.642	2.417	3.621	2.9e-4	0.002
ENSG00000262655.3	SPON1	12.282	0.535	18.155	3.642	1.031	4.008	6.1e-5	5.7e-4
ENSG00000127920.5	GNG11	74.984	7.782	108.585	3.641	0.536	4.529	5.9e-6	7.1e-5
ENSG00000165309.13	ARMC3	7.651	0	11.476	3.641	2.333	3.416	6.3e-4	0.005
ENSG00000276256.1	AC011043.1	43.167	4.108	62.697	3.64	0.668	3.752	1.8e-4	0.001
ENSG00000131711.14	MAP1B	11.485	0.444	17.006	3.64	0.616	6.25	4.1e-10	1.0e-8
ENSG00000184188.6	AC026410.1	8.29	0.075	12.397	3.639	1.847	3.312	9.2e-4	0.006
ENSG00000198758.10	EPS8L3	7.635	0	11.453	3.638	2.282	3.799	1.5e-4	0.001
ENSG00000090104.11	RGS1	8.082	0.052	12.097	3.638	1.453	3.798	1.5e-4	0.001
ENSG00000168005.8	SPINDOC	21.028	1.551	30.766	3.638	0.672	4.092	4.3e-5	4.2e-4
ENSG00000180263.13	FGD6	20.575	1.504	30.111	3.635	0.579	6.445	1.2e-10	3.2e-9
ENSG00000168393.12	DTYMK	38.876	3.63	56.498	3.634	0.664	3.762	1.7e-4	0.001
ENSG00000123219.12	CENPK	14.502	0.803	21.351	3.632	0.958	4.803	1.6e-6	2.1e-5
ENSG00000187514.16	PTMA	1137	131.492	1639.76	3.63	0.514	5.587	2.3e-8	4.5e-7
ENSG00000128710.5	HOXD10	8.809	0.144	13.142	3.628	1.09	4.444	8.8e-6	1.0e-4
ENSG00000119986.6	AVPI1	17.446	1.153	25.593	3.627	0.799	3.835	1.3e-4	0.001
ENSG00000126821.7	SGPP1	17.607	1.173	25.824	3.626	0.615	5.023	5.1e-7	7.6e-6
ENSG00000116701.14	NCF2	9.507	0.228	14.147	3.625	1.462	1.87	0.061	0.207
ENSG00000150867.13	PIP4K2A	20.569	1.523	30.092	3.624	0.627	5.378	7.5e-8	1.3e-6
ENSG00000165609.12	NUDT5	25.75	2.129	37.561	3.623	0.65	4.302	1.7e-5	1.8e-4
ENSG00000243621.1	AC003989.2	7.546	0	11.319	3.623	5.78	0.523	0.601	0.936
ENSG00000231112.1	MTHFD2P3	7.538	0	11.307	3.621	4.678	0.823	0.41	0.783
ENSG00000103202.12	NME4	144.479	16.073	208.682	3.618	0.556	4.098	4.2e-5	4.1e-4
ENSG00000170190.15	SLC16A5	33.688	3.077	48.994	3.616	0.666	3.552	3.8e-4	0.003
ENSG00000166546.13	BEAN1	7.981	0.057	11.943	3.615	1.282	4.709	2.5e-6	3.2e-5
ENSG00000186529.15	CYP4F3	8.219	0.085	12.286	3.614	1.406	1.734	0.083	0.26
ENSG00000225544.1	AC245452.2	7.495	0	11.242	3.614	3.176	1.739	0.082	0.258
ENSG00000112118.18	MCM3	35.522	3.301	51.633	3.613	0.588	4.21	2.6e-5	2.6e-4
ENSG00000185306.12	C12orf56	7.666	0.021	11.488	3.613	1.781	3.197	0.001	0.009
ENSG00000167165.18	UGT1A6	7.486	0	11.229	3.612	2.54	3.104	0.002	0.012
ENSG00000104450.12	SPAG1	8.973	0.175	13.372	3.612	0.968	5.562	2.7e-8	5.1e-7
ENSG00000128283.6	CDC42EP1	30.51	2.716	44.407	3.611	0.602	4.336	1.5e-5	1.6e-4
ENSG00000164054.15	SHISA5	67.15	7.04	97.205	3.611	0.571	3.819	1.3e-4	0.001
ENSG00000226916.8	WDR46	10.285	0.335	15.26	3.607	0.86	4.791	1.7e-6	2.2e-5
ENSG00000146535.13	GNA12	32.406	2.952	47.133	3.606	0.606	1.749	0.08	0.254
ENSG00000100316.15	RPL3	794.179	93.116	1144.71	3.606	0.517	4.516	6.3e-6	7.5e-5
ENSG00000171224.8	FAM241B	12.106	0.552	17.882	3.605	1.038	3.393	6.9e-4	0.005
ENSG00000204463.12	BAG6	7.441	0	11.162	3.604	2.162	4.781	1.7e-6	2.3e-5
ENSG00000198056.13	PRIM1	16.489	1.073	24.198	3.603	0.791	3.797	1.5e-4	0.001
ENSG00000161960.14	EIF4A1	453.334	52.865	653.568	3.603	0.56	4.233	2.3e-5	2.4e-4
ENSG00000130590.13	SAMD10	11.806	0.519	17.449	3.603	1.064	3.586	3.4e-4	0.003
ENSG00000106245.10	BUD31	136.394	15.3	196.942	3.602	0.578	3.731	1.9e-4	0.002
ENSG00000170632.13	ARMC10	38.981	3.743	56.599	3.602	0.578	4.65	3.3e-6	4.2e-5
ENSG00000239865.6	RPP21	63.116	6.607	91.37	3.602	0.771	3.394	6.9e-4	0.005
ENSG00000165304.7	MELK	7.727	0.036	11.572	3.6	1.632	4.358	1.3e-5	1.4e-4
ENSG00000168404.12	MLKL	14.406	0.831	21.194	3.599	0.7	4.731	2.2e-6	2.9e-5
ENSG00000284673.1	AC092865.3	7.407	0	11.111	3.598	4.78	0.781	0.435	0.811
ENSG00000141480.17	ARRB2	43.874	4.339	63.641	3.598	0.681	3.287	0.001	0.007
ENSG00000095539.15	SEMA4G	10.759	0.399	15.94	3.598	0.912	2.859	0.004	0.023
ENSG00000134910.12	STT3A	97.585	10.736	141.009	3.597	0.591	3.719	2.0e-4	0.002
ENSG00000234422.1	UBE2WP1	7.397	0	11.095	3.596	3.454	1.512	0.131	0.364
ENSG00000142156.14	COL6A1	140.06	15.799	202.191	3.596	0.546	3.686	2.3e-4	0.002
ENSG00000232816.1	HLA-K	7.384	0	11.075	3.594	2.378	3.476	5.1e-4	0.004
ENSG00000213772.3	EIF1P7	7.382	0	11.073	3.594	3.482	1.478	0.139	0.382
ENSG00000169241.17	SLC50A1	27.851	2.444	40.555	3.593	0.725	3.782	1.6e-4	0.001
ENSG00000185359.12	HGS	108.11	12.033	156.148	3.592	0.55	2.934	0.003	0.019
ENSG00000228867.8	NRM	14.031	0.797	20.647	3.59	0.851	3.663	2.5e-4	0.002
ENSG00000171680.21	PLEKHG5	15.825	1.013	23.231	3.589	0.605	5.455	4.9e-8	8.9e-7
ENSG00000167460.15	TPM4	119.003	13.383	171.814	3.587	0.535	4.158	3.2e-5	3.2e-4
ENSG00000159685.10	CHCHD6	12.323	0.598	18.185	3.586	1.062	3.228	0.001	0.008
ENSG00000132603.13	NIP7	31.436	2.897	45.706	3.583	0.605	4.193	2.8e-5	2.8e-4
ENSG00000100906.10	NFKBIA	243.68	28.431	351.305	3.581	0.727	2.963	0.003	0.018
ENSG00000134222.16	PSRC1	7.704	0.047	11.532	3.581	1.684	3.862	1.1e-4	9.9e-4
ENSG00000142627.12	EPHA2	21.106	1.662	30.828	3.58	0.589	4.873	1.1e-6	1.5e-5
ENSG00000012660.13	ELOVL5	30.004	2.734	43.639	3.579	0.645	4.217	2.5e-5	2.6e-4
ENSG00000094916.15	CBX5	34.123	3.231	49.569	3.579	0.598	5.554	2.8e-8	5.3e-7
ENSG00000120008.15	WDR11	28.709	2.582	41.773	3.578	0.585	4.297	1.7e-5	1.9e-4
ENSG00000013364.18	MVP	91.975	10.211	132.857	3.578	0.55	4.486	7.3e-6	8.4e-5
ENSG00000156504.16	FAM122B	21.249	1.684	31.032	3.577	0.701	4.419	9.9e-6	1.1e-4
ENSG00000121039.9	RDH10	27.953	2.494	40.682	3.576	0.624	3.98	6.9e-5	6.4e-4
ENSG00000273870.1	AL138721.1	7.283	0	10.924	3.576	5.965	0.564	0.573	0.916
ENSG00000281300.1	NXN	9.952	0.322	14.767	3.576	2.734	1.551	0.121	0.344
ENSG00000160410.14	SHKBP1	46.042	4.685	66.721	3.574	0.663	4.263	2.0e-5	2.1e-4
ENSG00000135333.13	EPHA7	7.272	0	10.908	3.574	2.185	4.981	6.3e-7	9.4e-6
ENSG00000101310.15	SEC23B	16.936	1.169	24.819	3.573	0.666	4.005	6.2e-5	5.8e-4
ENSG00000078369.17	GNB1	160.503	18.533	231.489	3.573	0.52	4.462	8.1e-6	9.4e-5
ENSG00000243749.1	TMEM35B	21.614	1.735	31.553	3.573	0.836	3.361	7.8e-4	0.005
ENSG00000153558.14	FBXL2	11.468	0.509	16.948	3.572	0.819	4.502	6.7e-6	7.9e-5
ENSG00000006327.13	TNFRSF12A	215.025	25.153	309.961	3.572	0.551	4.186	2.8e-5	2.9e-4
ENSG00000186523.14	FAM86B1	12.348	0.616	18.214	3.571	0.974	3.598	3.2e-4	0.003
ENSG00000206298.8	PSMB8	33.16	3.143	48.169	3.569	0.698	3.648	2.6e-4	0.002
ENSG00000242372.7	EIF6	128.545	14.724	185.456	3.568	0.563	3.98	6.9e-5	6.4e-4
ENSG00000206458.10	PSORS1C1	7.222	0	10.833	3.565	2.852	2.143	0.032	0.123
ENSG00000242114.5	MTFP1	27.3	2.442	39.729	3.565	0.701	3.632	2.8e-4	0.002
ENSG00000147251.15	DOCK11	9.053	0.223	13.468	3.564	1.196	1.486	0.137	0.377
ENSG00000182511.11	FES	19.514	1.497	28.523	3.563	1.045	2.14	0.032	0.124
ENSG00000094804.9	CDC6	7.433	0.027	11.137	3.563	1.261	5.201	2.0e-7	3.2e-6
ENSG00000280852.2	AC025048.6	7.211	0	10.816	3.563	2.872	2.161	0.031	0.119
ENSG00000164690.7	SHH	7.207	0	10.81	3.562	2.159	4.679	2.9e-6	3.7e-5
ENSG00000213281.4	NRAS	23.139	1.943	33.738	3.561	0.578	4.725	2.3e-6	3.0e-5
ENSG00000136026.13	CKAP4	45.616	4.691	66.078	3.559	0.556	4.498	6.9e-6	8.1e-5
ENSG00000144354.13	CDCA7	22.666	1.892	33.053	3.558	0.631	4.166	3.1e-5	3.1e-4
ENSG00000185033.14	SEMA4B	25.775	2.277	37.524	3.555	0.591	5.163	2.4e-7	3.9e-6
ENSG00000163913.11	IFT122	18.443	1.385	26.972	3.552	0.681	3.954	7.7e-5	7.0e-4
ENSG00000075275.16	CELSR1	7.466	0.039	11.18	3.552	0.951	5.78	7.5e-9	1.6e-7
ENSG00000023839.10	ABCC2	13.736	0.809	20.199	3.551	0.734	6.239	4.4e-10	1.1e-8
ENSG00000132692.18	BCAN	8.142	0.122	12.153	3.551	1.462	3.194	0.001	0.009
ENSG00000275565.4	ALOX5	8.101	0.117	12.093	3.551	1.652	1.689	0.091	0.279
ENSG00000177192.13	PUS1	38.38	3.845	55.648	3.547	0.621	4.232	2.3e-5	2.4e-4
ENSG00000258071.1	ARL2BPP2	7.125	0	10.688	3.547	2.859	2.235	0.025	0.102
ENSG00000198742.9	SMURF1	31.333	2.981	45.509	3.546	0.546	4.815	1.5e-6	2.0e-5
ENSG00000140682.18	TGFB1I1	43.867	4.526	63.538	3.546	0.637	4.108	4.0e-5	3.9e-4
ENSG00000131652.13	THOC6	52.833	5.632	76.434	3.545	0.6	4.142	3.4e-5	3.4e-4
ENSG00000149541.9	B3GAT3	27.236	2.481	39.613	3.544	0.669	3.433	6.0e-4	0.004
ENSG00000141510.16	TP53	32.579	3.142	47.298	3.544	0.726	4.316	1.6e-5	1.7e-4
ENSG00000134109.10	EDEM1	14.103	0.863	20.723	3.543	0.654	3.094	0.002	0.012
ENSG00000163918.10	RFC4	27.3	2.493	39.703	3.542	0.728	3.284	0.001	0.007
ENSG00000105464.3	GRIN2D	7.616	0.064	11.392	3.542	0.897	6.812	9.6e-12	3.1e-10
ENSG00000130270.16	ATP8B3	7.66	0.07	11.456	3.541	1.224	5.592	2.2e-8	4.4e-7
ENSG00000104738.16	MCM4	60.891	6.651	88.011	3.54	0.585	3.751	1.8e-4	0.001
ENSG00000213964.3	CHCHD4P4	7.078	0	10.617	3.538	3.637	1.389	0.165	0.431
ENSG00000099331.13	MYO9B	37.394	3.756	54.214	3.537	0.582	4.456	8.3e-6	9.6e-5
ENSG00000161091.12	MFSD12	40.859	4.191	59.194	3.536	0.688	3.32	9.0e-4	0.006
ENSG00000145632.14	PLK2	87.617	9.99	126.43	3.535	0.696	4.134	3.6e-5	3.5e-4
ENSG00000154217.14	PITPNC1	30.078	2.856	43.689	3.535	0.684	3.286	0.001	0.007
ENSG00000232702.3	AL158050.1	7.055	0	10.582	3.534	2.987	2.068	0.039	0.143
ENSG00000109220.10	CHIC2	29.636	2.81	43.05	3.531	1.035	1.995	0.046	0.165
ENSG00000164211.12	STARD4	11.078	0.502	16.366	3.531	0.685	5.745	9.2e-9	1.9e-7
ENSG00000185480.11	PARPBP	9.949	0.363	14.742	3.53	0.931	5.204	2.0e-7	3.2e-6
ENSG00000169499.14	PLEKHA2	14.791	0.967	21.703	3.528	0.742	1.355	0.175	0.45
ENSG00000153310.19	FAM49B	58.312	6.391	84.272	3.528	0.645	2.42	0.016	0.069
ENSG00000170540.14	ARL6IP1	91.332	10.516	131.74	3.527	0.553	4.143	3.4e-5	3.4e-4
ENSG00000117308.14	GALE	19.09	1.506	27.882	3.527	0.852	4.342	1.4e-5	1.5e-4
ENSG00000137309.19	HMGA1	338.447	41.417	486.962	3.524	0.522	4.174	3.0e-5	3.0e-4
ENSG00000166908.17	PIP4K2C	23.301	2.038	33.932	3.523	0.632	3.973	7.1e-5	6.5e-4
ENSG00000160345.12	C9orf116	10.395	0.426	15.38	3.522	1.398	2.735	0.006	0.032
ENSG00000267692.1	TAF9P3	6.991	0	10.487	3.522	5.622	0.556	0.579	0.92
ENSG00000116478.11	HDAC1	58.167	6.408	84.047	3.521	0.567	4.543	5.5e-6	6.6e-5
ENSG00000050327.14	ARHGEF5	11.648	0.584	17.18	3.521	0.92	5.132	2.9e-7	4.5e-6
ENSG00000259374.2	NDUFB4P11	10.823	0.482	15.994	3.52	2.127	1.991	0.046	0.166
ENSG00000161513.11	FDXR	14.53	0.947	21.322	3.519	0.733	4.211	2.5e-5	2.6e-4
ENSG00000164695.4	CHMP4C	8.931	0.246	13.274	3.518	0.982	4.519	6.2e-6	7.4e-5
ENSG00000273993.4	PTPRK	29.681	2.85	43.096	3.518	0.615	3.432	6.0e-4	0.004
ENSG00000099284.13	H2AFY2	29.393	2.815	42.681	3.517	0.622	4.169	3.1e-5	3.1e-4
ENSG00000067606.16	PRKCZ	10.075	0.391	14.917	3.517	1.299	4.842	1.3e-6	1.8e-5
ENSG00000129255.15	MPDU1	55.532	6.1	80.248	3.516	0.625	3.542	4.0e-4	0.003
ENSG00000089505.17	CMTM1	6.957	0	10.436	3.516	2.364	3.31	9.3e-4	0.006
ENSG00000155438.11	NIFK	83.419	9.611	120.322	3.515	0.578	3.154	0.002	0.01
ENSG00000196531.10	NACA	1471.11	184.158	2114.59	3.514	0.513	-0.62	0.535	0.884
ENSG00000181359.5	HSP90AA6P	8.038	0.137	11.988	3.513	2.07	2.532	0.011	0.053
ENSG00000187796.14	CARD9	8.344	0.176	12.429	3.513	1.328	1.396	0.163	0.427
ENSG00000232431.3	AC055876.1	7.349	0.051	10.998	3.513	4.388	0.127	0.899	0.989
ENSG00000089248.6	ERP29	108.053	12.73	155.715	3.513	0.565	3.749	1.8e-4	0.001
ENSG00000100196.10	KDELR3	13.415	0.815	19.715	3.513	0.839	3.793	1.5e-4	0.001
ENSG00000082269.16	FAM135A	30.443	2.96	44.185	3.512	0.591	3.378	7.3e-4	0.005
ENSG00000146674.14	IGFBP3	63.092	7.074	91.101	3.512	0.803	-0.366	0.714	0.983
ENSG00000235907.2	AC115285.1	6.934	0	10.401	3.511	2.64	2.841	0.004	0.025
ENSG00000088882.7	CPXM1	7.624	0.087	11.393	3.511	1.449	4.027	5.7e-5	5.4e-4
ENSG00000103742.11	IGDCC4	34.931	3.53	50.631	3.511	0.549	3.667	2.5e-4	0.002
ENSG00000231699.1	AC020550.1	6.932	0	10.397	3.511	5.915	0.503	0.615	0.947
ENSG00000150403.17	TMCO3	28.957	2.778	42.047	3.51	0.666	3.334	8.6e-4	0.006
ENSG00000151131.10	C12orf45	16.199	1.169	23.714	3.51	0.619	1.493	0.135	0.374
ENSG00000259738.1	ZNF444P1	6.926	0	10.389	3.51	4.101	1.068	0.285	0.632
ENSG00000105939.12	ZC3HAV1	15.258	1.052	22.361	3.509	0.683	4.28	1.9e-5	2.0e-4
ENSG00000102096.9	PIM2	13.966	0.89	20.504	3.508	0.791	3.825	1.3e-4	0.001
ENSG00000219992.2	AL391422.1	6.915	0	10.373	3.508	3.023	1.977	0.048	0.17
ENSG00000132965.9	ALOX5AP	18.72	1.493	27.333	3.506	1.192	2.502	0.012	0.057
ENSG00000224064.1	AL356390.1	6.907	0	10.36	3.506	3.653	1.454	0.146	0.395
ENSG00000185298.12	CCDC137	19.305	1.569	28.173	3.506	0.677	3.283	0.001	0.007
ENSG00000140848.16	CPNE2	41.358	4.362	59.857	3.505	0.589	3.993	6.5e-5	6.1e-4
ENSG00000182796.14	TMEM198B	31.491	3.118	45.678	3.503	0.757	3.469	5.2e-4	0.004
ENSG00000105722.9	ERF	45.546	4.907	65.866	3.501	0.583	3.477	5.1e-4	0.004
ENSG00000177707.10	NECTIN3	16.811	1.261	24.586	3.501	0.723	4.16	3.2e-5	3.2e-4
ENSG00000104856.13	RELB	24.266	2.211	35.293	3.499	0.628	4.237	2.3e-5	2.4e-4
ENSG00000114446.4	IFT57	29.334	2.856	42.573	3.498	0.649	3.655	2.6e-4	0.002
ENSG00000069849.10	ATP1B3	71.476	8.216	103.107	3.498	0.593	3.583	3.4e-4	0.003
ENSG00000276836.4	ARHGAP27	11.591	0.602	17.085	3.497	0.917	2.701	0.007	0.035
ENSG00000143797.11	MBOAT2	9.127	0.29	13.546	3.495	0.843	4.069	4.7e-5	4.6e-4
ENSG00000079150.17	FKBP7	29.962	2.944	43.471	3.495	0.912	0.879	0.379	0.755
ENSG00000168918.13	INPP5D	21.533	1.871	31.363	3.495	1.06	0.471	0.638	0.959
ENSG00000282852.1	AL137790.1	6.842	0	10.263	3.494	5.971	0.489	0.625	0.951
ENSG00000141696.12	P3H4	18.191	1.448	26.563	3.493	0.692	3.879	1.0e-4	9.3e-4
ENSG00000105810.9	CDK6	12.454	0.718	18.322	3.491	0.559	6.077	1.2e-9	2.9e-8
ENSG00000101004.14	NINL	9.176	0.3	13.614	3.491	0.879	3.438	5.9e-4	0.004
ENSG00000219085.1	NPM1P37	6.828	0	10.243	3.491	2.621	3.007	0.003	0.016
ENSG00000186185.13	KIF18B	7.452	0.082	11.138	3.488	0.975	5.293	1.2e-7	2.1e-6
ENSG00000068489.12	PRR11	11.327	0.578	16.702	3.488	0.832	4.91	9.1e-7	1.3e-5
ENSG00000130402.11	ACTN4	134.408	16.333	193.446	3.488	0.53	4.207	2.6e-5	2.7e-4
ENSG00000159055.3	MIS18A	11.644	0.619	17.156	3.488	0.868	3.781	1.6e-4	0.001
ENSG00000168701.18	TMEM208	57.613	6.517	83.162	3.485	0.713	3.105	0.002	0.012
ENSG00000027869.11	SH2D2A	6.794	0	10.191	3.484	2.314	3.52	4.3e-4	0.003
ENSG00000087077.13	TRIP6	28.477	2.789	41.322	3.482	0.693	4.295	1.7e-5	1.9e-4
ENSG00000183856.10	IQGAP3	6.937	0.021	10.395	3.48	1.196	6.198	5.7e-10	1.4e-8
ENSG00000100505.13	TRIM9	9.074	0.296	13.462	3.48	0.895	6.104	1.0e-9	2.5e-8
ENSG00000153208.16	MERTK	9.071	0.296	13.458	3.479	0.823	4.263	2.0e-5	2.1e-4
ENSG00000169432.15	SCN9A	7.891	0.145	11.764	3.479	0.978	6.835	8.2e-12	2.7e-10
ENSG00000198113.2	TOR4A	9.22	0.317	13.671	3.478	0.704	5.759	8.5e-9	1.7e-7
ENSG00000203950.6	RTL8A	69.352	8.07	99.993	3.477	0.69	2.959	0.003	0.018
ENSG00000196935.8	SRGAP1	7.95	0.154	11.848	3.477	0.65	7.219	5.2e-13	1.9e-11
ENSG00000123353.9	ORMDL2	46.109	5.075	66.627	3.477	0.661	4.026	5.7e-5	5.4e-4
ENSG00000196126.11	HLA-DRB1	7.261	0.066	10.859	3.475	1.735	3.477	5.1e-4	0.004
ENSG00000111671.9	SPSB2	18.07	1.463	26.374	3.474	0.821	3.577	3.5e-4	0.003
ENSG00000232004.1	CAP1P2	6.73	0	10.094	3.472	2.355	3.712	2.1e-4	0.002
ENSG00000165533.18	TTC8	13.642	0.894	20.016	3.472	0.823	3.575	3.5e-4	0.003
ENSG00000000003.14	TSPAN6	24.391	2.287	35.442	3.471	0.707	3.521	4.3e-4	0.003
ENSG00000130958.11	SLC35D2	24.02	2.242	34.909	3.469	0.728	4.057	5.0e-5	4.8e-4
ENSG00000162745.10	OLFML2B	32.935	3.399	47.704	3.469	1.046	1.816	0.069	0.227
ENSG00000184465.15	WDR27	27.079	2.642	39.297	3.468	0.757	3.067	0.002	0.013
ENSG00000111450.13	STX2	20.034	1.729	29.187	3.468	0.613	3.994	6.5e-5	6.0e-4
ENSG00000231414.1	AC016700.2	6.708	0	10.061	3.467	5.971	0.494	0.621	0.949
ENSG00000276380.2	UBE2NL	6.707	0	10.06	3.467	2.44	3.457	5.5e-4	0.004
ENSG00000138834.12	MAPK8IP3	49.01	5.49	70.77	3.467	0.576	3.512	4.4e-4	0.003
ENSG00000160072.19	ATAD3B	22.773	2.089	33.116	3.465	0.648	3.783	1.6e-4	0.001
ENSG00000148429.14	USP6NL	9.243	0.331	13.7	3.465	0.691	5.084	3.7e-7	5.7e-6
ENSG00000111335.12	OAS2	12.817	0.795	18.828	3.465	0.777	3.968	7.3e-5	6.7e-4
ENSG00000242361.7	HLA-DMA	6.691	0	10.036	3.464	2.775	2.283	0.022	0.093
ENSG00000143368.9	SF3B4	38.331	4.121	55.436	3.462	0.61	3.655	2.6e-4	0.002
ENSG00000157110.15	RBPMS	51.088	5.789	73.737	3.461	0.586	3.689	2.2e-4	0.002
ENSG00000132122.11	SPATA6	10.209	0.463	15.082	3.458	0.844	3.74	1.8e-4	0.002
ENSG00000142192.20	APP	201.186	25.397	289.08	3.458	0.516	4.044	5.3e-5	5.0e-4
ENSG00000114405.10	C3orf14	10.476	0.498	15.465	3.458	1.184	2.75	0.006	0.031
ENSG00000277594.2	DDX52	12.614	0.778	18.532	3.457	0.63	4.507	6.6e-6	7.8e-5
ENSG00000242573.1	ACTR3P3	6.656	0	9.984	3.457	2.457	3.183	0.001	0.009
ENSG00000135587.8	SMPD2	9.764	0.406	14.444	3.457	0.934	3.864	1.1e-4	9.8e-4
ENSG00000249444.2	AC114324.2	6.655	0	9.983	3.457	5.971	0.494	0.621	0.949
ENSG00000100003.17	SEC14L2	13.12	0.845	19.258	3.457	0.887	4.893	9.9e-7	1.4e-5
ENSG00000228409.6	CCT6P1	9.583	0.384	14.183	3.456	1.188	3.098	0.002	0.012
ENSG00000183723.12	CMTM4	15.685	1.183	22.937	3.455	0.649	3.715	2.0e-4	0.002
ENSG00000122705.16	CLTA	158.829	19.916	228.285	3.454	0.641	3.038	0.002	0.014
ENSG00000169242.11	EFNA1	30.778	3.159	44.588	3.454	0.8	2.921	0.003	0.02
ENSG00000138801.8	PAPSS1	19.079	1.628	27.805	3.454	0.74	1.857	0.063	0.211
ENSG00000174705.12	SH3PXD2B	8.396	0.23	12.479	3.454	0.67	6.488	8.7e-11	2.4e-9
ENSG00000188460.4	ACTBP11	7.255	0.081	10.841	3.454	1.835	3.241	0.001	0.008
ENSG00000250746.1	AC105250.1	6.89	0.035	10.317	3.451	1.851	3.788	1.5e-4	0.001
ENSG00000154473.17	BUB3	98.678	12.075	141.979	3.451	0.542	3.424	6.2e-4	0.004
ENSG00000145014.17	TMEM44	23.991	2.279	34.847	3.45	0.714	4.054	5.0e-5	4.8e-4
ENSG00000130755.12	GMFG	34.793	3.697	50.341	3.45	1.351	1.04	0.298	0.651
ENSG00000108039.17	XPNPEP1	85.705	10.379	123.367	3.45	0.561	3.196	0.001	0.009
ENSG00000273628.1	AL354798.1	12.341	0.752	18.135	3.449	2.515	1.316	0.188	0.474
ENSG00000100997.18	ABHD12	26.381	2.599	38.272	3.448	0.686	2.53	0.011	0.053
ENSG00000100911.15	PSME2	139.459	17.47	200.454	3.447	0.605	3.923	8.7e-5	7.9e-4
ENSG00000064547.13	LPAR2	6.912	0.041	10.347	3.447	1.817	3.33	8.7e-4	0.006
ENSG00000114473.13	IQCG	14.57	1.049	21.331	3.446	0.802	3.884	1.0e-4	9.1e-4
ENSG00000166171.12	DPCD	57.054	6.64	82.26	3.446	0.674	3.443	5.8e-4	0.004
ENSG00000205361.8	MT1DP	6.591	0	9.887	3.445	5.586	0.572	0.568	0.913
ENSG00000175985.9	PLEKHD1	7.249	0.088	10.829	3.442	0.965	5.829	5.6e-9	1.2e-7
ENSG00000276130.4	SLC22A18	6.793	0.028	10.175	3.442	1.886	3.014	0.003	0.015
ENSG00000183199.6	HSP90AB3P	6.579	0	9.868	3.442	2.339	4.05	5.1e-5	4.9e-4
ENSG00000132842.13	AP3B1	44.128	4.955	63.715	3.442	0.7	2.711	0.007	0.034
ENSG00000133816.14	MICAL2	17.583	1.459	25.645	3.438	0.614	6.001	2.0e-9	4.5e-8
ENSG00000124839.12	RAB17	11.936	0.712	17.548	3.437	1.118	3.468	5.2e-4	0.004
ENSG00000231702.2	AL645608.4	6.555	0	9.833	3.437	5.976	0.438	0.661	0.965
ENSG00000127314.17	RAP1B	211.094	27.088	303.098	3.437	0.597	4.298	1.7e-5	1.8e-4
ENSG00000153989.7	NUS1	31.962	3.366	46.261	3.436	0.572	4.163	3.1e-5	3.1e-4
ENSG00000173852.14	DPY19L1	33.074	3.514	47.854	3.436	0.581	6.774	1.2e-11	4.0e-10
ENSG00000177105.9	RHOG	76.516	9.269	110.139	3.436	0.737	2.718	0.007	0.034
ENSG00000088340.15	FER1L4	8.992	0.324	13.326	3.436	0.841	4.687	2.8e-6	3.6e-5
ENSG00000085733.15	CTTN	113.924	14.236	163.768	3.435	0.529	4.167	3.1e-5	3.1e-4
ENSG00000221988.12	PPT2	11.64	0.676	17.123	3.435	1.06	4.965	6.9e-7	1.0e-5
ENSG00000159322.17	ADPGK	20.597	1.865	29.963	3.434	0.615	3.718	2.0e-4	0.002
ENSG00000279686.1	AC142391.1	8.163	0.216	12.137	3.434	1.693	2.586	0.01	0.047
ENSG00000132341.11	RAN	681.083	89.527	976.861	3.433	0.529	3.538	4.0e-4	0.003
ENSG00000136688.10	IL36G	6.526	0	9.79	3.432	2.596	2.688	0.007	0.036
ENSG00000181444.12	ZNF467	12.865	0.842	18.877	3.431	0.851	4.187	2.8e-5	2.9e-4
ENSG00000043355.11	ZIC2	6.523	0	9.784	3.431	2.217	4.063	4.8e-5	4.7e-4
ENSG00000170385.9	SLC30A1	11.135	0.613	16.395	3.431	0.671	4.963	6.9e-7	1.0e-5
ENSG00000121281.12	ADCY7	9.662	0.418	14.284	3.43	0.735	4.964	6.9e-7	1.0e-5
ENSG00000151651.15	ADAM8	9.63	0.416	14.238	3.428	1.067	3.3	9.7e-4	0.007
ENSG00000180964.16	TCEAL8	72.309	8.768	104.079	3.427	0.649	3.217	0.001	0.008
ENSG00000275644.4	OSCAR	6.671	0.024	9.994	3.424	2.511	3.615	3.0e-4	0.002
ENSG00000131591.17	C1orf159	12.645	0.823	18.556	3.423	0.797	4.618	3.9e-6	4.8e-5
ENSG00000146828.17	SLC12A9	13.835	0.983	20.261	3.423	0.758	4.312	1.6e-5	1.8e-4
ENSG00000284794.1	AC275639.1	6.473	0	9.71	3.421	5.971	0.489	0.625	0.951
ENSG00000197948.10	FCHSD1	9.382	0.389	13.878	3.421	0.85	3.794	1.5e-4	0.001
ENSG00000089723.9	OTUB2	6.467	0	9.701	3.42	2.168	4.701	2.6e-6	3.3e-5
ENSG00000174837.14	ADGRE1	9.818	0.449	14.503	3.419	1.189	5.125	3.0e-7	4.7e-6
ENSG00000147400.8	CETN2	48.786	5.673	70.342	3.418	0.651	3.403	6.7e-4	0.005
ENSG00000077782.19	FGFR1	61.998	7.451	89.272	3.417	0.671	2.314	0.021	0.087
ENSG00000120075.5	HOXB5	8.535	0.279	12.663	3.417	0.924	4.447	8.7e-6	1.0e-4
ENSG00000188375.4	H3F3C	6.448	0	9.671	3.416	2.456	3.318	9.1e-4	0.006
ENSG00000232326.9	TAP2	6.445	0	9.667	3.415	2.444	3.013	0.003	0.015
ENSG00000227163.2	AL139220.1	6.444	0	9.666	3.415	2.803	2.28	0.023	0.094
ENSG00000131171.12	SH3BGRL	47.398	5.503	68.345	3.415	0.662	3.322	8.9e-4	0.006
ENSG00000134574.11	DDB2	56.167	6.688	80.907	3.413	0.622	4.624	3.8e-6	4.7e-5
ENSG00000133740.10	E2F5	14.186	1.045	20.757	3.411	0.734	3.543	4.0e-4	0.003
ENSG00000101811.13	CSTF2	9.953	0.476	14.691	3.41	0.837	4.303	1.7e-5	1.8e-4
ENSG00000187416.11	LHFPL3	6.416	0	9.625	3.409	2.244	3.988	6.7e-5	6.2e-4
ENSG00000100599.15	RIN3	11.05	0.626	16.263	3.409	0.673	4.6	4.2e-6	5.2e-5
ENSG00000125841.12	NRSN2	13.954	1.017	20.423	3.409	0.754	3.475	5.1e-4	0.004
ENSG00000059377.16	TBXAS1	6.675	0.037	9.994	3.407	1.959	2.455	0.014	0.064
ENSG00000149968.11	MMP3	6.399	0	9.598	3.406	2.466	3.712	2.1e-4	0.002
ENSG00000157765.12	SLC34A2	7.498	0.149	11.173	3.405	1.664	4.563	5.0e-6	6.1e-5
ENSG00000109814.11	UGDH	26.509	2.719	38.404	3.405	0.619	3.63	2.8e-4	0.002
ENSG00000071564.14	TCF3	43.793	5.057	63.161	3.405	0.597	3.875	1.1e-4	9.5e-4
ENSG00000134504.13	KCTD1	15.585	1.244	22.755	3.404	0.832	4.09	4.3e-5	4.2e-4
ENSG00000158517.13	NCF1	10.587	0.568	15.597	3.404	1.225	3.189	0.001	0.009
ENSG00000233440.2	HMGA1P6	6.388	0	9.583	3.404	3.331	1.66	0.097	0.292
ENSG00000072571.19	HMMR	7.055	0.091	10.537	3.403	1.027	5.266	1.4e-7	2.4e-6
ENSG00000105202.8	FBL	290.139	38.446	415.986	3.402	0.537	3.392	6.9e-4	0.005
ENSG00000184530.8	C6orf58	6.376	0	9.563	3.401	2.336	3.409	6.5e-4	0.005
ENSG00000137965.10	IFI44	34.051	3.753	49.2	3.401	0.927	2.043	0.041	0.15
ENSG00000103653.16	CSK	41.955	4.831	60.517	3.399	0.663	4.323	1.5e-5	1.7e-4
ENSG00000205352.10	PRR13	163.863	21.384	235.103	3.399	0.554	3.502	4.6e-4	0.003
ENSG00000005020.12	SKAP2	31.806	3.455	45.981	3.398	0.625	3.676	2.4e-4	0.002
ENSG00000147257.13	GPC3	10.71	0.59	15.77	3.398	1.096	2.701	0.007	0.035
ENSG00000132297.11	HHLA1	8.98	0.356	13.292	3.398	1.315	2.765	0.006	0.03
ENSG00000102078.15	SLC25A14	15.825	1.287	23.095	3.397	0.901	2.41	0.016	0.07
ENSG00000122515.14	ZMIZ2	44.185	5.143	63.705	3.397	0.583	3.11	0.002	0.012
ENSG00000081870.11	HSPB11	35.441	3.959	51.181	3.395	0.746	3.034	0.002	0.014
ENSG00000241571.2	ATP5F1AP7	6.339	0	9.509	3.394	2.448	3.473	5.1e-4	0.004
ENSG00000149499.11	EML3	48.584	5.763	69.995	3.392	0.606	3.791	1.5e-4	0.001
ENSG00000137691.12	C11orf70	7.139	0.11	10.653	3.392	1.76	3.316	9.1e-4	0.006
ENSG00000137161.16	CNPY3	22.487	2.205	32.628	3.391	0.675	3.753	1.7e-4	0.001
ENSG00000241935.8	HOGA1	8.217	0.258	12.197	3.391	0.953	3.918	8.9e-5	8.1e-4
ENSG00000104093.13	DMXL2	25.276	2.59	36.619	3.389	0.663	3.344	8.3e-4	0.006
ENSG00000170629.14	DPY19L2P2	10.026	0.507	14.786	3.389	0.722	5.068	4.0e-7	6.2e-6
ENSG00000231351.2	AC111200.2	6.317	0	9.475	3.389	2.859	2.209	0.027	0.108
ENSG00000197956.9	S100A6	1421.26	193.409	2035.18	3.389	0.577	3.584	3.4e-4	0.003
ENSG00000142798.18	HSPG2	115.491	14.953	165.761	3.386	0.627	2.796	0.005	0.028
ENSG00000091844.7	RGS17	6.538	0.033	9.791	3.385	0.971	6.34	2.3e-10	6.0e-9
ENSG00000226912.1	ISCA2P1	6.292	0	9.439	3.384	3.045	1.943	0.052	0.181
ENSG00000135392.16	DNAJC14	27.918	2.966	40.394	3.384	0.609	2.661	0.008	0.039
ENSG00000168672.3	FAM84B	28.014	2.98	40.531	3.383	0.669	3.457	5.5e-4	0.004
ENSG00000115687.13	PASK	9.386	0.425	13.867	3.383	0.755	4.472	7.7e-6	9.0e-5
ENSG00000232022.7	FAAHP1	17.16	1.493	24.993	3.382	1.263	1.083	0.279	0.622
ENSG00000139372.14	TDG	32.481	3.599	46.922	3.381	0.569	3.876	1.1e-4	9.4e-4
ENSG00000119333.11	WDR34	22.68	2.253	32.893	3.381	0.689	3.425	6.1e-4	0.004
ENSG00000137801.10	THBS1	18.271	1.649	26.582	3.38	0.766	4.833	1.3e-6	1.9e-5
ENSG00000130768.14	SMPDL3B	6.941	0.092	10.365	3.379	1.721	3.786	1.5e-4	0.001
ENSG00000125844.15	RRBP1	29.928	3.254	43.265	3.379	0.672	2.82	0.005	0.026
ENSG00000262246.5	CORO7	15.722	1.302	22.933	3.378	0.701	4.193	2.8e-5	2.8e-4
ENSG00000161618.9	ALDH16A1	24.257	2.477	35.146	3.378	0.67	3.006	0.003	0.016
ENSG00000101447.14	FAM83D	6.478	0.03	9.702	3.378	1.641	4.274	1.9e-5	2.0e-4
ENSG00000175643.8	RMI2	9.686	0.472	14.293	3.377	0.961	3.561	3.7e-4	0.003
ENSG00000198960.10	ARMCX6	42.72	5.021	61.569	3.377	0.663	2.947	0.003	0.018
ENSG00000161798.6	AQP5	6.26	0	9.391	3.377	2.499	3.322	8.9e-4	0.006
ENSG00000100065.14	CARD10	17.44	1.54	25.391	3.377	0.706	3.205	0.001	0.009
ENSG00000112742.9	TTK	6.25	0	9.375	3.375	2.181	4.418	9.9e-6	1.1e-4
ENSG00000184216.13	IRAK1	78.007	9.902	112.06	3.374	0.602	3.304	9.5e-4	0.006
ENSG00000259516.2	ANP32AP1	6.244	0	9.366	3.374	2.512	3.245	0.001	0.008
ENSG00000107679.14	PLEKHA1	108.522	14.151	155.708	3.371	0.649	3.241	0.001	0.008
ENSG00000141959.16	PFKL	45.281	5.403	65.221	3.371	0.556	4.305	1.7e-5	1.8e-4
ENSG00000240385.1	RPS29P20	6.228	0	9.342	3.37	5.972	0.48	0.631	0.955
ENSG00000077063.10	CTTNBP2	9.789	0.494	14.436	3.369	0.828	6.281	3.4e-10	8.7e-9
ENSG00000172613.7	RAD9A	24.181	2.488	35.028	3.369	0.711	2.764	0.006	0.03
ENSG00000149554.12	CHEK1	12.041	0.807	17.657	3.368	0.753	5.227	1.7e-7	2.9e-6
ENSG00000132207.17	SLX1A	28.053	3.029	40.565	3.367	0.708	3.327	8.8e-4	0.006
ENSG00000134508.12	CABLES1	11.142	0.684	16.371	3.367	0.762	4.276	1.9e-5	2.0e-4
ENSG00000073803.13	MAP3K13	16.069	1.367	23.42	3.367	0.689	3.68	2.3e-4	0.002
ENSG00000104435.13	STMN2	7.687	0.206	11.427	3.365	2.09	2.318	0.02	0.086
ENSG00000163462.17	TRIM46	6.646	0.062	9.937	3.365	1.291	4.867	1.1e-6	1.6e-5
ENSG00000167578.17	RAB4B	30.066	3.314	43.441	3.365	0.847	2.261	0.024	0.097
ENSG00000102900.12	NUP93	44.283	5.289	63.779	3.365	0.588	2.833	0.005	0.025
ENSG00000234228.1	NCLP2	6.195	0	9.293	3.364	2.423	3.597	3.2e-4	0.003
ENSG00000167397.14	VKORC1	70.86	8.988	101.796	3.363	0.632	3.328	8.7e-4	0.006
ENSG00000076928.17	ARHGEF1	54.816	6.768	78.841	3.362	0.584	3.244	0.001	0.008
ENSG00000196155.12	PLEKHG4	9.159	0.416	13.53	3.36	0.886	4.622	3.8e-6	4.7e-5
ENSG00000135697.9	BCO1	6.176	0	9.264	3.36	2.217	4.199	2.7e-5	2.7e-4
ENSG00000121236.20	TRIM6	6.735	0.078	10.063	3.359	1.294	4.816	1.5e-6	2.0e-5
ENSG00000251451.1	GTF2IP9	12.852	0.932	18.812	3.358	2.789	1.127	0.26	0.592
ENSG00000182963.9	GJC1	12.402	0.869	18.168	3.358	0.614	4.013	6.0e-5	5.6e-4
ENSG00000134996.11	OSTF1	21.076	2.08	30.574	3.358	0.995	2.66	0.008	0.039
ENSG00000133639.4	BTG1	84.883	10.989	121.831	3.357	0.756	2.48	0.013	0.06
ENSG00000164687.10	FABP5	378.162	51.945	541.271	3.356	0.573	3.493	4.8e-4	0.004
ENSG00000135245.9	HILPDA	16.17	1.399	23.556	3.356	0.949	3.102	0.002	0.012
ENSG00000129195.15	PIMREG	6.753	0.086	10.087	3.352	1.694	3.789	1.5e-4	0.001
ENSG00000251550.1	AC091133.4	6.139	0	9.209	3.352	3.99	1.113	0.266	0.602
ENSG00000225486.1	AL663058.1	6.136	0	9.204	3.351	3.621	1.417	0.156	0.416
ENSG00000173947.13	PIFO	7.254	0.157	10.803	3.351	1.7	3.76	1.7e-4	0.001
ENSG00000101945.16	SUV39H1	11.494	0.752	16.866	3.35	0.744	3.535	4.1e-4	0.003
ENSG00000223427.1	AC016716.1	6.132	0	9.198	3.35	2.654	2.717	0.007	0.034
ENSG00000141985.9	SH3GL1	38.112	4.485	54.926	3.35	0.61	3.679	2.3e-4	0.002
ENSG00000170892.10	TSEN34	6.13	0	9.195	3.35	2.245	3.873	1.1e-4	9.5e-4
ENSG00000139410.14	SDSL	9.545	0.48	14.078	3.349	0.98	3.365	7.7e-4	0.005
ENSG00000156136.9	DCK	31.107	3.509	44.906	3.348	0.737	-0.024	0.98	0.991
ENSG00000174899.10	PQLC2L	7.071	0.135	10.539	3.346	1.477	3.109	0.002	0.012
ENSG00000133858.15	ZFC3H1	32.512	3.718	46.909	3.344	0.657	1.479	0.139	0.382
ENSG00000239199.1	RPL21P6	8.084	0.279	11.986	3.344	2.414	1.763	0.078	0.248
ENSG00000037897.16	METTL1	34.592	4.014	49.881	3.343	0.72	3.836	1.2e-4	0.001
ENSG00000102024.17	PLS3	76.327	9.901	109.54	3.342	0.73	2.72	0.007	0.034
ENSG00000165457.13	FOLR2	8.647	0.361	12.791	3.341	1.801	1.29	0.197	0.489
ENSG00000077147.14	TM9SF3	77.022	10.007	110.53	3.341	0.529	3.284	0.001	0.007
ENSG00000163479.13	SSR2	212.358	29.105	303.984	3.341	0.545	3.645	2.7e-4	0.002
ENSG00000136068.14	FLNB	35.213	4.11	50.764	3.341	0.549	2.548	0.011	0.051
ENSG00000152056.16	AP1S3	10.593	0.639	15.57	3.338	1.052	2.492	0.013	0.058
ENSG00000112290.12	WASF1	7.525	0.205	11.185	3.338	0.931	4.67	3.0e-6	3.8e-5
ENSG00000271605.5	MILR1	13.638	1.07	19.922	3.337	1.124	3.143	0.002	0.01
ENSG00000164932.12	CTHRC1	18.595	1.771	27.007	3.337	1.077	2.417	0.016	0.069
ENSG00000149577.15	SIDT2	50.65	6.31	72.82	3.336	0.756	-0.057	0.955	0.989
ENSG00000131981.15	LGALS3	203.458	27.94	291.218	3.336	0.555	3.648	2.6e-4	0.002
ENSG00000153214.9	TMEM87B	13.511	1.056	19.738	3.334	0.661	4.979	6.4e-7	9.5e-6
ENSG00000104129.9	DNAJC17	32.491	3.746	46.863	3.334	0.746	0.512	0.609	0.942
ENSG00000160209.18	PDXK	57.642	7.311	82.808	3.334	0.709	3.355	7.9e-4	0.005
ENSG00000243686.2	RPLP1P11	18.565	1.773	26.962	3.334	2.056	1.232	0.218	0.526
ENSG00000170909.13	OSCAR	6.226	0.024	9.327	3.334	2.313	3.54	4.0e-4	0.003
ENSG00000120885.21	CLU	195.305	26.854	279.531	3.332	0.55	3.732	1.9e-4	0.002
ENSG00000156535.13	CD109	11.253	0.742	16.509	3.329	0.579	5.346	9.0e-8	1.6e-6
ENSG00000141198.15	TOM1L1	19.59	1.928	28.421	3.329	0.782	5.851	4.9e-9	1.0e-7
ENSG00000111339.11	ART4	8.193	0.307	12.136	3.329	0.925	4.452	8.5e-6	9.8e-5
ENSG00000115318.11	LOXL3	8.763	0.389	12.95	3.329	1.122	3.599	3.2e-4	0.002
ENSG00000284687.1	AC092865.4	6.031	0	9.047	3.329	5.088	0.687	0.492	0.859
ENSG00000169515.5	CCDC8	8.318	0.326	12.314	3.328	0.81	4.676	2.9e-6	3.7e-5
ENSG00000285109.1	GATA4	6.028	0	9.042	3.328	2.218	4.066	4.8e-5	4.6e-4
ENSG00000186854.10	TRABD2A	7.599	0.224	11.287	3.328	0.849	4.611	4.0e-6	4.9e-5
ENSG00000057252.12	SOAT1	9.671	0.519	14.247	3.328	0.606	5.664	1.5e-8	3.0e-7
ENSG00000183018.8	SPNS2	18.563	1.786	26.952	3.327	0.639	4.006	6.2e-5	5.8e-4
ENSG00000276504.4	TFPT	8.298	0.324	12.284	3.327	1.511	2.523	0.012	0.054
ENSG00000072501.17	SMC1A	26.951	2.981	38.935	3.326	0.566	2.416	0.016	0.069
ENSG00000102384.13	CENPI	6.657	0.091	9.94	3.326	1.224	4.145	3.4e-5	3.4e-4
ENSG00000273542.1	HIST1H4K	6.019	0	9.029	3.326	4.71	0.996	0.319	0.68
ENSG00000183696.13	UPP1	26.876	2.971	38.828	3.326	0.674	2.493	0.013	0.058
ENSG00000157870.14	FAM213B	8.883	0.408	13.121	3.326	0.972	3.102	0.002	0.012
ENSG00000115415.18	STAT1	71.086	9.275	101.992	3.325	0.653	3.047	0.002	0.014
ENSG00000075651.15	PLD1	11.516	0.785	16.881	3.325	0.666	4.519	6.2e-6	7.4e-5
ENSG00000168243.10	GNG4	6.673	0.094	9.963	3.325	1.265	4.89	1.0e-6	1.4e-5
ENSG00000111087.9	GLI1	7.188	0.168	10.698	3.324	1.086	3.52	4.3e-4	0.003
ENSG00000186715.10	MST1L	10.231	0.603	15.044	3.323	0.782	4.217	2.5e-5	2.6e-4
ENSG00000239557.1	AC092045.1	5.999	0	8.998	3.322	2.463	3.39	7.0e-4	0.005
ENSG00000227073.1	SDHDP2	8.32	0.332	12.314	3.321	2.385	1.68	0.093	0.283
ENSG00000174943.9	KCTD13	23.691	2.532	34.271	3.32	0.715	3.256	0.001	0.007
ENSG00000179431.6	FJX1	9.039	0.436	13.341	3.32	0.794	4.558	5.2e-6	6.3e-5
ENSG00000068796.16	KIF2A	13.401	1.062	19.57	3.318	0.692	3.838	1.2e-4	0.001
ENSG00000198561.13	CTNND1	58.853	7.58	84.489	3.317	0.618	3.387	7.1e-4	0.005
ENSG00000141582.14	CBX4	8.847	0.412	13.064	3.316	0.844	3.627	2.9e-4	0.002
ENSG00000111641.11	NOP2	56.051	7.188	80.483	3.315	0.556	3.683	2.3e-4	0.002
ENSG00000168282.5	MGAT2	17.681	1.683	25.68	3.314	0.651	3.99	6.6e-5	6.1e-4
ENSG00000278644.2	PCGF2	15.989	1.441	23.263	3.313	0.683	3.982	6.8e-5	6.3e-4
ENSG00000168476.11	REEP4	14.54	1.233	21.193	3.313	0.771	3.628	2.9e-4	0.002
ENSG00000133256.12	PDE6B	12.27	0.907	17.951	3.313	1.197	3.45	5.6e-4	0.004
ENSG00000126583.10	PRKCG	7.52	0.225	11.168	3.312	1.727	4.342	1.4e-5	1.5e-4
ENSG00000189410.11	SH2D5	5.95	0	8.925	3.311	2.204	4.163	3.1e-5	3.1e-4
ENSG00000075142.13	SRI	95.216	12.856	136.397	3.31	0.579	2.959	0.003	0.018
ENSG00000259790.1	ANP32BP1	5.942	0	8.914	3.309	2.462	3.427	6.1e-4	0.004
ENSG00000136319.11	TTC5	17.163	1.618	24.935	3.308	0.653	3.815	1.4e-4	0.001
ENSG00000232708.1	HLA-K	7.072	0.164	10.526	3.307	1.685	2.846	0.004	0.024
ENSG00000205084.10	TMEM231	7.455	0.22	11.073	3.307	0.861	4.09	4.3e-5	4.2e-4
ENSG00000264343.5	NOTCH2NL	34.166	4.075	49.211	3.307	0.761	1.543	0.123	0.347
ENSG00000097046.12	CDC7	6.958	0.149	10.363	3.306	1.099	5.311	1.1e-7	1.9e-6
ENSG00000213189.5	BTF3L4P2	34.318	4.101	49.426	3.305	1.394	1.628	0.104	0.307
ENSG00000164749.11	HNF4G	5.921	0	8.882	3.305	2.238	4.093	4.3e-5	4.2e-4
ENSG00000123609.10	NMI	24.423	2.675	35.296	3.304	0.697	3.415	6.4e-4	0.005
ENSG00000049249.8	TNFRSF9	7.246	0.192	10.774	3.304	0.775	5.51	3.6e-8	6.8e-7
ENSG00000010671.15	BTK	9.456	0.512	13.927	3.303	1.895	3.053	0.002	0.014
ENSG00000179218.13	CALR	362.36	51.569	517.755	3.303	0.526	3.67	2.4e-4	0.002
ENSG00000184992.10	BRI3BP	7.768	0.269	11.518	3.302	0.716	5.594	2.2e-8	4.3e-7
ENSG00000052802.12	MSMO1	16.558	1.541	24.067	3.302	0.749	3.472	5.2e-4	0.004
ENSG00000164953.15	TMEM67	9.268	0.486	13.659	3.302	0.876	3.584	3.4e-4	0.003
ENSG00000003436.15	TFPI	62.889	8.257	90.205	3.301	0.552	4.651	3.3e-6	4.1e-5
ENSG00000278718.3	GSDMD	31.732	3.744	45.727	3.3	0.617	3.254	0.001	0.008
ENSG00000161955.16	TNFSF13	16.058	1.472	23.35	3.3	0.718	3.215	0.001	0.008
ENSG00000079819.18	EPB41L2	115.85	15.941	165.804	3.3	0.582	3.791	1.5e-4	0.001
ENSG00000163017.13	ACTG2	17.288	1.653	25.106	3.299	0.997	2.818	0.005	0.026
ENSG00000092470.11	WDR76	6.937	0.152	10.33	3.298	1.004	5.056	4.3e-7	6.6e-6
ENSG00000107521.18	HPS1	37.753	4.626	54.316	3.298	0.642	3.067	0.002	0.013
ENSG00000225210.10	DUXAP9	14.82	1.297	21.582	3.297	1.016	3.731	1.9e-4	0.002
ENSG00000258245.1	RPL10P13	5.887	0	8.83	3.297	4.061	1.077	0.282	0.626
ENSG00000228960.6	OR2A9P	6.785	0.131	10.112	3.296	0.973	4.681	2.9e-6	3.7e-5
ENSG00000105771.13	SMG9	25.398	2.836	36.679	3.296	0.659	3.173	0.002	0.01
ENSG00000197299.10	BLM	6.488	0.089	9.688	3.295	0.969	4.121	3.8e-5	3.7e-4
ENSG00000166226.12	CCT2	215.52	30.483	308.039	3.295	0.524	3.817	1.4e-4	0.001
ENSG00000089327.14	FXYD5	60.369	7.924	86.592	3.295	0.649	3.266	0.001	0.007
ENSG00000043514.15	TRIT1	19.645	2.005	28.466	3.294	0.703	2.656	0.008	0.04
ENSG00000006756.15	ARSD	12.462	0.959	18.213	3.294	0.77	3.517	4.4e-4	0.003
ENSG00000119977.20	TCTN3	14.553	1.264	21.198	3.293	0.713	3.677	2.4e-4	0.002
ENSG00000155256.17	ZFYVE27	19.777	2.028	28.651	3.292	0.644	2.702	0.007	0.035
ENSG00000104894.11	CD37	11.6	0.837	16.982	3.291	1.234	2.092	0.036	0.136
ENSG00000160813.6	PPP1R35	35.619	4.343	51.258	3.29	0.716	2.948	0.003	0.018
ENSG00000003056.7	M6PR	136.076	19.005	194.612	3.29	0.533	3.377	7.3e-4	0.005
ENSG00000263772.1	AC017100.2	5.849	0	8.773	3.289	3.586	1.411	0.158	0.419
ENSG00000099282.9	TSPAN15	50.597	6.54	72.626	3.288	0.664	3.205	0.001	0.009
ENSG00000174791.10	RIN1	14.798	1.309	21.543	3.287	0.66	3.903	9.5e-5	8.5e-4
ENSG00000100055.20	CYTH4	16.568	1.568	24.068	3.287	1.17	1.69	0.091	0.279
ENSG00000138271.5	GPR87	5.835	0	8.752	3.286	4.792	1.754	0.079	0.252
ENSG00000102393.9	GLA	34.091	4.135	49.069	3.285	0.729	3.353	8.0e-4	0.006
ENSG00000082153.17	BZW1	119.214	16.592	170.525	3.285	0.524	4.152	3.3e-5	3.3e-4
ENSG00000110318.13	CEP126	7.279	0.212	10.812	3.285	0.71	5.087	3.6e-7	5.6e-6
ENSG00000065600.12	TMEM206	9.631	0.558	14.167	3.284	0.905	2.557	0.011	0.05
ENSG00000173821.19	RNF213	64.97	8.666	93.122	3.284	0.694	2.158	0.031	0.12
ENSG00000073921.17	PICALM	187.598	26.646	268.074	3.283	0.684	3.195	0.001	0.009
ENSG00000162702.7	ZNF281	16.356	1.549	23.759	3.28	0.587	4.412	1.0e-5	1.2e-4
ENSG00000112139.14	MDGA1	6.73	0.136	10.028	3.279	0.791	4.77	1.8e-6	2.5e-5
ENSG00000158125.9	XDH	5.955	0.023	8.922	3.278	1.383	5.189	2.1e-7	3.4e-6
ENSG00000224678.3	GAPDHP46	6.391	0.087	9.543	3.278	5.771	0.977	0.329	0.693
ENSG00000132359.14	RAP1GAP2	9.846	0.595	14.471	3.278	0.844	5.612	2.0e-8	3.9e-7
ENSG00000131188.11	PRR7	10.174	0.644	14.94	3.277	0.943	3.534	4.1e-4	0.003
ENSG00000147383.10	NSDHL	18.848	1.921	27.312	3.277	0.721	3.282	0.001	0.007
ENSG00000153012.11	LGI2	5.998	0.03	8.982	3.277	1.595	3.013	0.003	0.015
ENSG00000217372.2	TUBB4BP7	5.794	0	8.691	3.277	2.435	3.404	6.6e-4	0.005
ENSG00000167767.13	KRT80	6.142	0.051	9.187	3.276	1.206	4.997	5.8e-7	8.7e-6
ENSG00000279208.1	CR381653.2	15.722	1.462	22.852	3.276	1.022	2.628	0.009	0.042
ENSG00000257847.1	LSM3P2	5.792	0	8.687	3.276	4.492	0.882	0.378	0.752
ENSG00000156384.14	SFR1	19.213	1.976	27.831	3.276	0.721	3.185	0.001	0.009
ENSG00000159579.13	RSPRY1	33.096	4.021	47.633	3.276	0.607	3.161	0.002	0.01
ENSG00000033100.16	CHPF2	16.407	1.565	23.828	3.275	0.644	3.522	4.3e-4	0.003
ENSG00000133247.13	KMT5C	15.705	1.462	22.826	3.275	0.84	1.774	0.076	0.243
ENSG00000110848.8	CD69	7.713	0.285	11.427	3.274	1.317	3.874	1.1e-4	9.5e-4
ENSG00000176692.5	FOXC2	6.158	0.056	9.21	3.273	1.281	4.686	2.8e-6	3.6e-5
ENSG00000232032.1	AC079781.2	5.778	0	8.667	3.273	5.976	0.438	0.661	0.965
ENSG00000143179.15	UCK2	33.998	4.164	48.915	3.273	0.588	3.571	3.6e-4	0.003
ENSG00000197977.3	ELOVL2	6.778	0.148	10.092	3.272	0.888	5.25	1.5e-7	2.6e-6
ENSG00000130202.9	NECTIN2	65.282	8.789	93.529	3.271	0.694	3.3	9.7e-4	0.007
ENSG00000178927.17	C17orf62	30.65	3.676	44.138	3.271	0.647	3.189	0.001	0.009
ENSG00000139194.7	RBP5	7.265	0.222	10.786	3.27	1.779	1.932	0.053	0.184
ENSG00000149483.11	TMEM138	30.707	3.687	44.217	3.27	0.705	2.619	0.009	0.043
ENSG00000100889.11	PCK2	15.302	1.41	22.248	3.27	0.873	3.795	1.5e-4	0.001
ENSG00000166147.13	FBN1	26.234	3.027	37.838	3.27	0.77	3.182	0.001	0.009
ENSG00000231549.1	ATP5MDP1	41.601	5.303	59.751	3.269	2.783	0.827	0.408	0.781
ENSG00000244405.7	ETV5	17.955	1.806	26.03	3.268	0.648	3.244	0.001	0.008
ENSG00000163482.11	STK36	27.26	3.184	39.299	3.268	0.673	3.853	1.2e-4	0.001
ENSG00000116095.10	PLEKHA3	9.017	0.483	13.283	3.267	0.649	2.017	0.044	0.157
ENSG00000262818.1	AC055872.1	5.751	0	8.627	3.267	4.346	0.954	0.34	0.707
ENSG00000051180.16	RAD51	10.332	0.679	15.159	3.267	0.894	3.252	0.001	0.008
ENSG00000123977.9	DAW1	5.747	0	8.621	3.266	2.329	3.595	3.2e-4	0.003
ENSG00000090339.8	ICAM1	29.259	3.488	42.145	3.265	0.604	3.667	2.5e-4	0.002
ENSG00000235222.12	MSH5	5.739	0	8.608	3.264	2.518	2.83	0.005	0.025
ENSG00000146409.10	SLC18B1	9.899	0.618	14.539	3.264	0.763	4.165	3.1e-5	3.1e-4
ENSG00000113249.12	HAVCR1	5.734	0	8.601	3.263	2.26	3.781	1.6e-4	0.001
ENSG00000076003.4	MCM6	18.612	1.916	26.961	3.261	0.598	3.919	8.9e-5	8.1e-4
ENSG00000227992.1	AC108463.1	14.582	1.318	21.214	3.261	2.101	1.24	0.215	0.521
ENSG00000137462.7	TLR2	8.124	0.358	12.008	3.26	1.128	2.661	0.008	0.039
ENSG00000167601.11	AXL	19.368	2.032	28.036	3.26	0.603	3.518	4.4e-4	0.003
ENSG00000135317.12	SNX14	51.699	6.847	74.125	3.259	0.588	2.056	0.04	0.146
ENSG00000165949.12	IFI27	524.821	77.336	748.563	3.258	0.637	2.842	0.004	0.025
ENSG00000183840.6	GPR39	5.712	0	8.569	3.258	2.206	4.294	1.8e-5	1.9e-4
ENSG00000164509.13	IL31RA	6.529	0.123	9.732	3.256	0.996	4.799	1.6e-6	2.2e-5
ENSG00000161847.13	RAVER1	14.311	1.286	20.823	3.255	0.66	3.678	2.4e-4	0.002
ENSG00000100883.11	SRP54	96.123	13.506	137.432	3.254	0.619	0.244	0.807	0.989
ENSG00000234745.10	HLA-B	58.925	7.955	84.41	3.254	0.741	3.541	4.0e-4	0.003
ENSG00000110811.19	P3H3	9.175	0.524	13.501	3.25	1.237	2.104	0.035	0.133
ENSG00000163521.15	GLB1L	6.009	0.05	8.989	3.25	1.421	3.528	4.2e-4	0.003
ENSG00000101457.12	DNTTIP1	159.648	23.074	227.936	3.249	0.577	2.734	0.006	0.032
ENSG00000166925.8	TSC22D4	49.955	6.637	71.613	3.249	0.568	3.283	0.001	0.007
ENSG00000103226.17	NOMO3	14.822	1.372	21.547	3.249	1.18	2.358	0.018	0.079
ENSG00000167880.7	EVPL	5.737	0.01	8.6	3.248	1.636	4.827	1.4e-6	1.9e-5
ENSG00000119403.14	PHF19	35.417	4.463	50.894	3.248	0.613	1.97	0.049	0.172
ENSG00000180776.15	ZDHHC20	31.101	3.819	44.742	3.247	0.6	1.634	0.102	0.304
ENSG00000282432.1	AL356095.3	5.66	0	8.489	3.246	5.971	0.489	0.625	0.951
ENSG00000236480.1	PKMP1	7.967	0.347	11.776	3.245	1.445	2.702	0.007	0.035
ENSG00000135253.13	KCP	14.545	1.336	21.15	3.245	0.666	5.111	3.2e-7	5.0e-6
ENSG00000093009.9	CDC45	10.139	0.676	14.87	3.243	1.191	4.165	3.1e-5	3.1e-4
ENSG00000169213.6	RAB3B	5.83	0.028	8.732	3.243	1	6.756	1.4e-11	4.5e-10
ENSG00000066279.17	ASPM	5.878	0.035	8.8	3.243	1.215	5.911	3.4e-9	7.5e-8
ENSG00000157617.16	C2CD2	11.148	0.829	16.308	3.242	0.698	2.83	0.005	0.025
ENSG00000137812.19	KNL1	5.774	0.02	8.651	3.242	1.162	4.526	6.0e-6	7.2e-5
ENSG00000274577.2	LHX1	5.64	0	8.46	3.242	2.32	3.761	1.7e-4	0.001
ENSG00000173264.14	GPR137	42.406	5.541	60.839	3.241	0.667	3.093	0.002	0.012
ENSG00000267303.1	AC011511.4	9.062	0.516	13.334	3.241	0.859	3.905	9.4e-5	8.5e-4
ENSG00000270296.1	STX8P1	5.633	0	8.45	3.24	3.962	1.178	0.239	0.56
ENSG00000175938.6	ORAI3	25.431	2.987	36.652	3.239	0.634	3.506	4.5e-4	0.003
ENSG00000214289.2	RPL39P5	5.626	0	8.439	3.239	3.845	1.524	0.127	0.358
ENSG00000137804.12	NUSAP1	33.646	4.23	48.354	3.238	0.637	4.619	3.9e-6	4.8e-5
ENSG00000105655.18	ISYNA1	30.491	3.754	43.859	3.238	0.635	3.269	0.001	0.007
ENSG00000122862.4	SRGN	116.343	16.719	166.155	3.238	0.563	3.562	3.7e-4	0.003
ENSG00000006468.13	ETV1	8.238	0.395	12.16	3.238	0.785	4.976	6.5e-7	9.6e-6
ENSG00000231834.10	HLA-A	6.391	0.116	9.528	3.237	1.775	2.588	0.01	0.047
ENSG00000129295.8	LRRC6	5.618	0	8.426	3.237	2.4	3.211	0.001	0.009
ENSG00000184254.16	ALDH1A3	24.48	2.851	35.294	3.237	0.588	4.304	1.7e-5	1.8e-4
ENSG00000274378.1	AC005702.3	5.615	0	8.423	3.236	3.22	1.69	0.091	0.279
ENSG00000204856.11	FAM216A	18.635	1.969	26.967	3.236	0.738	3.691	2.2e-4	0.002
ENSG00000135074.15	ADAM19	12.35	1.019	18.016	3.235	0.592	4.592	4.4e-6	5.4e-5
ENSG00000142303.13	ADAMTS10	24.183	2.816	34.866	3.232	0.714	2.578	0.01	0.048
ENSG00000103769.9	RAB11A	251.095	37.212	358.037	3.232	0.548	1.774	0.076	0.243
ENSG00000128534.7	LSM8	41.156	5.392	59.038	3.232	0.611	3.283	0.001	0.007
ENSG00000236699.8	ARHGEF38	6.512	0.139	9.698	3.231	1.707	3.993	6.5e-5	6.1e-4
ENSG00000174718.11	KIAA1551	45.503	6.055	65.227	3.231	0.644	2.807	0.005	0.027
ENSG00000088832.16	FKBP1A	283.777	42.221	404.555	3.23	0.583	1.09	0.276	0.616
ENSG00000253953.2	PCDHGB4	6.795	0.184	10.1	3.229	0.802	5.466	4.6e-8	8.5e-7
ENSG00000227671.4	AL390728.4	29.265	3.6	42.098	3.228	0.732	2.713	0.007	0.034
ENSG00000235700.1	CYCSP52	11.295	0.869	16.508	3.227	2.749	1.103	0.27	0.609
ENSG00000196118.11	CCDC189	9.37	0.577	13.766	3.227	1.435	3.378	7.3e-4	0.005
ENSG00000130826.17	DKC1	59.7	8.236	85.432	3.226	0.578	2.954	0.003	0.018
ENSG00000131037.14	EPS8L1	9.805	0.644	14.385	3.226	1.501	3.007	0.003	0.016
ENSG00000092841.18	MYL6	1847.62	280.568	2631.14	3.225	0.521	4.037	5.4e-5	5.1e-4
ENSG00000115935.17	WIPF1	18.492	1.97	26.754	3.224	1.04	-0.174	0.862	0.989
ENSG00000104889.6	RNASEH2A	11.816	0.956	17.247	3.222	0.768	2.969	0.003	0.017
ENSG00000090661.11	CERS4	12.798	1.108	18.642	3.22	1.05	2.7	0.007	0.035
ENSG00000070669.16	ASNS	20.651	2.309	29.823	3.22	0.702	4.407	1.0e-5	1.2e-4
ENSG00000185187.12	SIGIRR	48.37	6.547	69.282	3.219	0.7	3.17	0.002	0.01
ENSG00000225398.3	PGM5P4	5.541	0	8.312	3.219	3.318	1.639	0.101	0.302
ENSG00000131238.17	PPT1	41.858	5.552	60.011	3.219	0.588	3.267	0.001	0.007
ENSG00000102057.9	KCND1	6.125	0.091	9.143	3.217	1.047	5.141	2.7e-7	4.3e-6
ENSG00000175354.19	PTPN2	35.311	4.558	50.688	3.217	0.656	3.137	0.002	0.011
ENSG00000273889.2	FAM83H	5.683	0.023	8.513	3.217	1.239	5.756	8.6e-9	1.8e-7
ENSG00000141367.11	CLTC	163.884	24.246	233.704	3.217	0.532	2.559	0.01	0.05
ENSG00000136098.16	NEK3	25.519	3.065	36.745	3.215	0.703	2.886	0.004	0.022
ENSG00000084110.10	HAL	5.633	0.017	8.441	3.214	2.012	2.711	0.007	0.034
ENSG00000076067.12	RBMS2	27.047	3.308	38.916	3.212	0.618	2.766	0.006	0.03
ENSG00000108828.15	VAT1	57.148	7.935	81.754	3.211	0.566	3.626	2.9e-4	0.002
ENSG00000077514.8	POLD3	23.2	2.72	33.44	3.211	0.646	4.175	3.0e-5	3.0e-4
ENSG00000188015.9	S100A3	6.203	0.108	9.251	3.21	1.95	2.497	0.013	0.058
ENSG00000180071.19	ANKRD18A	5.65	0.023	8.463	3.209	2.008	2.311	0.021	0.087
ENSG00000179222.17	MAGED1	98.578	14.332	140.701	3.208	0.533	2.991	0.003	0.016
ENSG00000225142.2	AC114495.1	5.49	0	8.236	3.207	3.224	1.764	0.078	0.248
ENSG00000134201.10	GSTM5	10.243	0.732	14.999	3.207	1.3	0.859	0.39	0.768
ENSG00000176381.5	PRR18	5.487	0	8.231	3.206	2.21	4.203	2.6e-5	2.7e-4
ENSG00000133812.15	SBF2	26.128	3.182	37.602	3.206	0.626	1.547	0.122	0.346
ENSG00000128641.18	MYO1B	35.67	4.653	51.178	3.206	0.554	4.714	2.4e-6	3.2e-5
ENSG00000128849.10	CGNL1	6.18	0.107	9.216	3.206	1.052	3.559	3.7e-4	0.003
ENSG00000250859.1	HNRNPKP1	5.484	0	8.226	3.206	2.412	3.488	4.9e-4	0.004
ENSG00000105865.10	DUS4L	15.93	1.612	23.088	3.205	0.708	3.424	6.2e-4	0.004
ENSG00000075131.9	TIPIN	13.757	1.278	19.997	3.205	0.933	3.163	0.002	0.01
ENSG00000128268.11	MGAT3	9.126	0.564	13.407	3.204	0.728	3.967	7.3e-5	6.7e-4
ENSG00000140650.11	PMM2	39.23	5.216	56.238	3.203	0.608	3.609	3.1e-4	0.002
ENSG00000099992.15	TBC1D10A	11.475	0.93	16.748	3.201	0.942	1.732	0.083	0.261
ENSG00000104881.15	PPP1R13L	22.092	2.573	31.852	3.201	0.745	2.619	0.009	0.043
ENSG00000138134.11	STAMBPL1	8.472	0.466	12.475	3.201	0.81	3.902	9.5e-5	8.6e-4
ENSG00000166788.9	SAAL1	21.748	2.52	31.361	3.201	0.757	2.685	0.007	0.037
ENSG00000273633.1	CDC42EP5	20.199	2.281	29.158	3.2	1.271	0.846	0.397	0.769
ENSG00000254212.1	AC009901.2	5.46	0	8.191	3.2	4.958	0.733	0.463	0.842
ENSG00000235034.6	C19orf81	12.469	1.086	18.161	3.199	1.506	1.555	0.12	0.342
ENSG00000126895.14	AVPR2	8.364	0.45	12.32	3.199	0.985	3.375	7.4e-4	0.005
ENSG00000276845.1	CR769775.3	5.457	0	8.185	3.199	5.97	0.498	0.619	0.949
ENSG00000139324.11	TMTC3	9.334	0.601	13.701	3.199	0.611	5.09	3.6e-7	5.6e-6
ENSG00000179528.15	LBX2	7.224	0.275	10.698	3.198	1.283	2.465	0.014	0.062
ENSG00000111605.16	CPSF6	44.869	6.116	64.246	3.197	0.552	2.328	0.02	0.084
ENSG00000212123.3	PRR22	7.948	0.388	11.728	3.196	1.047	3.427	6.1e-4	0.004
ENSG00000047578.12	KIAA0556	12.499	1.095	18.201	3.196	0.718	2.93	0.003	0.019
ENSG00000258411.2	AL161670.1	5.443	0	8.164	3.196	5.977	0.432	0.665	0.967
ENSG00000100749.7	VRK1	15.882	1.621	23.013	3.196	0.749	3.008	0.003	0.015
ENSG00000147535.16	PLPP5	33.876	4.415	48.606	3.195	0.693	2.448	0.014	0.065
ENSG00000151883.17	PARP8	19.907	2.247	28.737	3.195	0.712	3.638	2.7e-4	0.002
ENSG00000198814.12	GK	7.536	0.326	11.141	3.195	0.817	4.207	2.6e-5	2.7e-4
ENSG00000186469.8	GNG2	12.774	1.141	18.591	3.194	1.354	-0.48	0.631	0.955
ENSG00000130545.15	CRB3	7.736	0.358	11.426	3.194	1.743	1.994	0.046	0.165
ENSG00000166881.9	NEMP1	8.824	0.527	12.972	3.194	0.67	5.03	4.9e-7	7.4e-6
ENSG00000235299.2	MRPL53P1	5.431	0	8.146	3.193	4.132	1.046	0.296	0.647
ENSG00000198087.7	CD2AP	24.829	3.017	35.736	3.193	0.635	3.606	3.1e-4	0.002
ENSG00000160796.16	NBEAL2	16.929	1.789	24.499	3.192	0.638	2.243	0.025	0.101
ENSG00000164430.15	CGAS	7.029	0.249	10.419	3.192	0.836	4.671	3.0e-6	3.8e-5
ENSG00000167123.18	CERCAM	13.137	1.202	19.104	3.191	0.769	2.385	0.017	0.074
ENSG00000002834.17	LASP1	40.743	5.506	58.362	3.19	0.565	3.133	0.002	0.011
ENSG00000075218.18	GTSE1	6.648	0.193	9.875	3.188	0.938	4.534	5.8e-6	6.9e-5
ENSG00000111737.11	RAB35	40.118	5.417	57.469	3.188	0.571	3.803	1.4e-4	0.001
ENSG00000122642.10	FKBP9	81.96	11.955	116.963	3.187	0.551	2.441	0.015	0.066
ENSG00000184163.3	C1QTNF12	5.401	0	8.102	3.186	2.61	2.592	0.01	0.046
ENSG00000115355.16	CCDC88A	29.982	3.841	43.052	3.186	0.555	3.328	8.8e-4	0.006
ENSG00000215583.3	ASS1P6	5.394	0	8.091	3.185	2.49	3.295	9.8e-4	0.007
ENSG00000175183.9	CSRP2	36.317	4.836	52.058	3.184	0.771	2.333	0.02	0.083
ENSG00000157379.13	DHRS1	16.772	1.781	24.267	3.183	0.793	2.942	0.003	0.019
ENSG00000135540.11	NHSL1	6.263	0.137	9.325	3.183	0.796	5.908	3.5e-9	7.6e-8
ENSG00000196420.7	S100A5	5.385	0	8.077	3.182	2.755	2.313	0.021	0.087
ENSG00000213917.2	RPL5P8	5.374	0	8.061	3.18	2.713	2.719	0.007	0.034
ENSG00000256984.2	AC008013.2	9.534	0.654	13.974	3.178	2.602	1.193	0.233	0.551
ENSG00000277983.1	AC244489.2	8.411	0.478	12.378	3.178	1.105	2.903	0.004	0.021
ENSG00000136108.14	CKAP2	13.107	1.216	19.053	3.178	0.704	3.403	6.7e-4	0.005
ENSG00000143127.12	ITGA10	9.711	0.683	14.226	3.178	0.694	4.522	6.1e-6	7.3e-5
ENSG00000112312.9	GMNN	17.523	1.91	25.329	3.178	0.796	3.008	0.003	0.015
ENSG00000196912.12	ANKRD36B	6.783	0.223	10.063	3.177	0.867	3.102	0.002	0.012
ENSG00000148700.14	ADD3	33.666	4.449	48.275	3.177	0.703	2.67	0.008	0.038
ENSG00000281076.2	ZDHHC8P1	8.584	0.507	12.623	3.176	1.15	3.599	3.2e-4	0.002
ENSG00000132535.18	DLG4	16.473	1.748	23.836	3.176	0.661	2.838	0.005	0.025
ENSG00000163399.15	ATP1A1	93.036	13.79	132.659	3.176	0.543	2.946	0.003	0.018
ENSG00000082074.16	FYB1	6.678	0.208	9.913	3.176	0.963	2.661	0.008	0.039
ENSG00000157837.15	SPPL3	38.559	5.223	55.227	3.176	0.566	3.867	1.1e-4	9.7e-4
ENSG00000130303.12	BST2	109.859	16.441	156.569	3.175	0.597	3.09	0.002	0.012
ENSG00000155903.11	RASA2	12.436	1.115	18.097	3.175	0.638	3.679	2.3e-4	0.002
ENSG00000120742.10	SERP1	61.176	8.788	87.37	3.174	0.559	3.908	9.3e-5	8.4e-4
ENSG00000166562.8	SEC11C	53.186	7.531	76.013	3.174	0.826	1.957	0.05	0.176
ENSG00000111716.12	LDHB	796.135	124.776	1131.82	3.171	0.514	3.498	4.7e-4	0.003
ENSG00000108010.11	GLRX3	184.832	28.327	263.084	3.171	0.582	2.275	0.023	0.094
ENSG00000168411.13	RFWD3	11.856	1.029	17.27	3.17	0.661	4.583	4.6e-6	5.6e-5
ENSG00000101639.18	CEP192	16.338	1.737	23.639	3.17	0.667	1.973	0.048	0.171
ENSG00000215184.2	RPS12P16	5.33	0	7.995	3.169	3.392	1.528	0.127	0.356
ENSG00000146555.18	SDK1	8.759	0.542	12.867	3.168	0.698	4.773	1.8e-6	2.4e-5
ENSG00000132481.6	TRIM47	35.14	4.712	50.354	3.168	0.658	2.579	0.01	0.048
ENSG00000148655.14	LRMDA	12.791	1.18	18.596	3.168	1.114	2.525	0.012	0.054
ENSG00000103018.16	CYB5B	134.806	20.492	191.963	3.166	0.604	3.339	8.4e-4	0.006
ENSG00000204642.13	HLA-F	5.795	0.075	8.655	3.166	2.22	2.391	0.017	0.073
ENSG00000113758.13	DBN1	44.539	6.213	63.701	3.165	0.554	3.521	4.3e-4	0.003
[truncated: 8,118 more rows]
