# Supplementary material for: Establishment of Organoids From Human Epithelioid Sarcoma With the Air-Liquid Interface Organoid Cultures
Source: Front Oncol. 2022 May 23;12:893592. doi: 10.3389/fonc.2022.893592 (PMC9169059; doi:10.3389/fonc.2022.893592)
Supplement: Supplementary file 12 [file Table_5.xlsx]

## Sheet: シート1 - Kmeans
Table S5 Gene list of each cluster with Kmeans Enrichment analyses in Normal, EPSTissue and ODX.
Kmeans
		Cluster	Normal	EPSTissue	ODX1	ODX2
ENSG00000143632	ACTA1	A	8.59822	-2.86529	-2.68321	-3.04972
ENSG00000104879	CKM	A	6.58094	1.65054	-3.96678	-4.26469
ENSG00000111245	MYL2	A	5.90657	2.3838	-3.91347	-4.3769
ENSG00000198125	MB	A	7.38567	-1.77548	-2.73435	-2.87584
ENSG00000101470	TNNC2	A	7.31825	-2.44732	-2.34343	-2.52751
ENSG00000114854	TNNC1	A	7.24744	-2.42524	-2.26658	-2.55562
ENSG00000180209	MYLPF	A	7.07027	-2.31013	-2.38605	-2.37408
ENSG00000175084	DES	A	7.04098	-1.88796	-2.53251	-2.62051
ENSG00000168530	MYL1	A	7.02744	-2.40151	-2.29964	-2.32628
ENSG00000196091	MYBPC1	A	7.02468	-2.37808	-2.23743	-2.40918
ENSG00000164879	CA3	A	6.98893	-2.3052	-2.32664	-2.3571
ENSG00000173991	TCAP	A	6.95548	-2.33096	-2.27716	-2.34736
ENSG00000109846	CRYAB	A	4.64626	3.28521	-3.63922	-4.29225
ENSG00000092054	MYH7	A	6.83456	-2.31557	-2.21978	-2.29921
ENSG00000156885	COX6A2	A	6.6943	-2.30114	-2.08078	-2.31237
ENSG00000125414	MYH2	A	6.65565	-2.22979	-2.18233	-2.24353
ENSG00000239474	KLHL41	A	6.37738	-2.08382	-2.1342	-2.15936
ENSG00000170290	SLN	A	5.21835	1.71434	-3.44164	-3.49105
ENSG00000068976	PYGM	A	6.34713	-2.08976	-2.06579	-2.19158
ENSG00000161281	COX7A1	A	4.94186	2.09949	-3.53477	-3.50657
ENSG00000143549	TPM3	A	6.28041	-2.15528	-1.99642	-2.12871
ENSG00000177791	MYOZ1	A	6.22663	-2.06291	-2.04041	-2.12331
ENSG00000109061	MYH1	A	6.13629	-2.04417	-2.02487	-2.06725
ENSG00000196296	ATP2A1	A	5.92935	-1.97312	-1.97903	-1.9772
ENSG00000284122	MIR6717	A	5.68521	-0.348113	-2.74888	-2.58822
ENSG00000105048	TNNT1	A	5.3718	-3.97901	-0.644714	-0.74807
ENSG00000197893	NRAP	A	5.54431	-1.85937	-1.82377	-1.86117
ENSG00000077522	ACTN2	A	5.42065	-1.78426	-1.73911	-1.89728
ENSG00000240045	STRIT1	A	5.37671	-1.84539	-1.77801	-1.75332
ENSG00000022267	FHL1	A	3.87472	1.99705	-3.97433	-1.89745
ENSG00000122367	LDB3	A	5.34325	-1.77126	-1.77274	-1.79925
ENSG00000101210	EEF1A2	A	5.32382	-2.0486	-1.54381	-1.73142
ENSG00000086967	MYBPC2	A	5.32929	-1.69574	-1.81558	-1.81797
ENSG00000154553	PDLIM3	A	4.81305	0.462185	-2.63567	-2.63956
ENSG00000160808	MYL3	A	5.07173	-0.384816	-2.31377	-2.37314
ENSG00000164708	PGAM2	A	5.24802	-1.72303	-1.75079	-1.7742
ENSG00000288250	TNNT3	A	5.2361	-1.53739	-1.83541	-1.8633
ENSG00000159173	TNNI1	A	5.2309	-1.74635	-1.74385	-1.7407
ENSG00000143318	CASQ1 ENSG00000143318	A	5.22358	-1.7479	-1.69924	-1.77644
ENSG00000284508	MIR133A2	A	5.21764	-1.73921	-1.73921	-1.73921
ENSG00000120729	MYOT	A	5.09105	-1.69813	-1.69241	-1.70052
ENSG00000004776	HSPB6	A	4.36159	0.846709	-2.59722	-2.61108
ENSG00000108515	ENO3	A	4.86052	-2.4795	-0.837511	-1.54351
ENSG00000004799	PDK4	A	4.95264	-1.53822	-1.80639	-1.60803
ENSG00000163092	XIRP2	A	4.93772	-1.63435	-1.66004	-1.64333
ENSG00000129170	CSRP3	A	4.91639	-1.63804	-1.64367	-1.63468
ENSG00000170807	LMOD2	A	4.89636	-1.62515	-1.63513	-1.63608
ENSG00000121769	FABP3	A	3.82929	1.53188	-2.6676	-2.69357
ENSG00000183091	NEB	A	4.82965	-1.59903	-1.62103	-1.60959
ENSG00000283927	MIR133A1	A	4.81574	-1.60525	-1.60525	-1.60525
ENSG00000168334	XIRP1	A	4.73664	-1.43316	-1.65887	-1.64461
ENSG00000288219	TNNI2	A	4.70161	-1.57848	-1.54998	-1.57315
ENSG00000163157	TMOD4	A	4.65062	-1.47935	-1.53674	-1.63453
ENSG00000186439	TRDN	A	4.64713	-1.56392	-1.54814	-1.53506
ENSG00000164309	CMYA5	A	4.64244	-1.49787	-1.56705	-1.57752
ENSG00000185847	LINC01405	A	2.86226	2.45729	-2.5886	-2.73095
ENSG00000163126	ANKRD23	A	4.60026	-1.32702	-1.67205	-1.60119
ENSG00000168333	PPDPFL	A	4.58776	-1.51482	-1.54144	-1.5315
ENSG00000135447	PPP1R1A	A	2.96266	-3.41968	2.13497	-1.67795
ENSG00000266964	FXYD1	A	4.4779	-0.680741	-1.94554	-1.85162
ENSG00000272573	MUSTN1	A	4.47012	-0.651275	-1.89383	-1.92502
ENSG00000165795	NDRG2	A	4.3943	-0.49486	-1.98802	-1.91142
ENSG00000188536	HBA2	A	4.10266	0.39913	-2.23851	-2.26327
ENSG00000158022	TRIM63	A	4.5012	-1.51379	-1.47816	-1.50925
ENSG00000163110	PDLIM5	A	4.47589	-1.16859	-1.63355	-1.67374
ENSG00000091482	SMPX	A	4.41686	-1.44999	-1.47531	-1.49156
ENSG00000198467	TPM2	A	4.27101	-0.503067	-1.69296	-2.07498
ENSG00000128591	FLNC	A	4.01885	0.295305	-2.13656	-2.17759
ENSG00000185482	STAC3	A	4.34361	-0.954728	-1.61815	-1.77073
ENSG00000116748	AMPD1	A	4.33856	-1.44583	-1.44848	-1.44425
ENSG00000248746	ACTN3	A	4.31975	-1.42022	-1.438	-1.46154
ENSG00000168509	HJV	A	4.2665	-1.3642	-1.45552	-1.44679
ENSG00000018625	ATP1A2	A	4.22878	-1.34143	-1.40702	-1.48032
ENSG00000101605	MYOM1	A	4.22702	-1.37803	-1.43223	-1.41675
ENSG00000155657	TTN	A	4.22682	-1.40722	-1.40751	-1.41209
ENSG00000244734	HBB	A	3.80765	0.385863	-2.09676	-2.09676
ENSG00000140986	RPL3L ENSG00000140986	A	4.18446	-1.39675	-1.39675	-1.39097
ENSG00000135821	GLUL	A	3.46518	0.976579	-1.96655	-2.47521
ENSG00000124701	APOBEC2	A	4.07405	-1.36748	-1.32891	-1.37766
ENSG00000131730	CKMT2	A	4.05933	-1.34953	-1.32717	-1.38263
ENSG00000288367	MIR675	A	3.17383	1.24826	-2.46904	-1.95304
ENSG00000101306	MYLK2	A	4.01339	-1.3175	-1.35503	-1.34086
LOC653513	NA	A	3.61771	0.280826	-1.91888	-1.97966
ENSG00000163380	LMOD3	A	3.92038	-1.31504	-1.29909	-1.30625
ENSG00000148677	ANKRD1	A	3.90848	-1.2535	-1.33005	-1.32493
ENSG00000163050	COQ8A	A	3.87982	-1.20314	-1.35997	-1.3167
ENSG00000282307	SERPINF1	A	2.56873	1.88524	-2.26022	-2.19376
ENSG00000172403	SYNPO2	A	3.87195	-1.19487	-1.35045	-1.32664
ENSG00000119938	PPP1R3C	A	3.86945	-1.23137	-1.22089	-1.4172
ENSG00000173641	HSPB7	A	3.64267	-0.00973558	-1.81009	-1.82285
ENSG00000167815	PRDX2	A	2.92274	1.39089	-2.11805	-2.19558
ENSG00000172399	MYOZ2	A	3.83941	-1.28263	-1.28263	-1.27415
ENSG00000214872	SMTNL1	A	3.83137	-1.27538	-1.28548	-1.27051
ENSG00000108823	SGCA ENSG00000108823	A	3.80381	-1.1546	-1.33504	-1.31417
ENSG00000187193	MT1X	A	2.72008	1.41255	-1.32068	-2.81195
ENSG00000178104	PDE4DIP	A	3.49115	0.176242	-1.82383	-1.84356
ENSG00000183386	FHL3 ENSG00000183386	A	3.7589	-1.33538	-1.27166	-1.15186
ENSG00000196218	RYR1	A	3.74439	-1.19851	-1.26781	-1.27808
ENSG00000138100	TRIM54	A	3.74147	-1.24856	-1.24135	-1.25157
ENSG00000134020	PEBP4	A	3.72435	-1.21128	-1.28357	-1.22951
ENSG00000206172	HBA1	A	3.608	-0.341481	-1.63142	-1.6351
ENSG00000185437	SH3BGR	A	3.68986	-0.788698	-1.44495	-1.45621
ENSG00000174437	ATP2A2	A	3.51563	-2.30553	-0.618381	-0.591715
ENSG00000133878	DUSP26	A	3.7112	-1.16993	-1.27063	-1.27063
ENSG00000079393	DUSP13	A	3.70139	-1.2338	-1.2338	-1.2338
ENSG00000182253	SYNM	A	3.68208	-1.22856	-1.27474	-1.17878
ENSG00000165887	ANKRD2	A	3.54999	-0.276227	-1.63893	-1.63484
ENSG00000185739	SRL	A	3.67614	-1.23332	-1.22759	-1.21522
ENSG00000145358	DDIT4L	A	3.65937	-1.17263	-1.23307	-1.25367
ENSG00000092529	CAPN3	A	3.28112	0.428685	-1.92306	-1.78675
ADSSL1	NA	A	3.55746	-0.726433	-1.35044	-1.48059
ENSG00000156804	FBXO32 ENSG00000156804	A	3.53911	-0.726016	-1.40939	-1.40371
ENSG00000189058	APOD	A	2.39666	1.67168	-2.04842	-2.01992
ENSG00000175564	UCP3	A	3.54395	-1.02935	-1.28699	-1.22762
ENSG00000164440	TXLNB	A	3.54001	-1.05893	-1.23736	-1.24372
ENSG00000115461	IGFBP5	A	2.77497	1.14454	-1.89096	-2.02855
ENSG00000111046	MYF6	A	3.52562	-1.17831	-1.17831	-1.169
ENSG00000171992	SYNPO	A	3.41528	-0.314179	-1.55295	-1.54816
ENSG00000148377	IDI2	A	3.5247	-1.17794	-1.17794	-1.16882
ENSG00000156219	ART3	A	3.51117	-1.17039	-1.17039	-1.17039
ENSG00000248592	STIMATE-MUSTN1	A	3.39669	-0.728134	-1.35667	-1.31188
ENSG00000265972	TXNIP	A	2.43632	1.29644	-2.58816	-1.1446
ENSG00000135218	CD36	A	3.39071	-0.701752	-1.32748	-1.36148
ENSG00000136717	BIN1	A	3.36205	-1.68719	-0.833009	-0.841856
ENSG00000174407	MIR1-1HG	A	3.40921	-1.11513	-1.1544	-1.13968
ENSG00000198523	PLN	A	3.34175	-0.633342	-1.35628	-1.35213
ENSG00000130528	HRC	A	3.342	-1.07062	-1.11689	-1.15449
ENSG00000072954	TMEM38A	A	3.33889	-0.998021	-1.17067	-1.1702
ENSG00000167476	JSRP1	A	3.32057	-1.07347	-1.14503	-1.10207
ENSG00000167588	GPD1	A	3.29685	-0.816311	-1.19529	-1.28526
ENSG00000105711	SCN1B	A	3.26995	-0.601147	-1.32416	-1.34464
ENSG00000284453	MIR1-2	A	3.29865	-1.09955	-1.09955	-1.09955
ENSG00000162614	NEXN	A	3.12494	-0.0954709	-1.51582	-1.51365
ENSG00000171033	PKIA	A	2.62066	-2.71798	-0.114077	0.211395
ENSG00000188176	SMTNL2	A	3.2661	-1.09403	-1.08868	-1.0834
ENSG00000173221	GLRX	A	2.73587	0.747789	-1.70578	-1.77787
ENSG00000112186	CAP2	A	3.22136	-1.07373	-1.16377	-0.983854
ENSG00000166592	RRAD ENSG00000166592	A	2.64217	-2.39763	0.605056	-0.8496
ENSG00000151729	SLC25A4	A	3.21005	-0.99736	-0.990801	-1.22188
ENSG00000163395	IGFN1	A	2.56103	-2.32684	0.806794	-1.04099
ENSG00000128016	ZFP36	A	2.13117	1.51228	-1.64394	-1.99951
ENSG00000112782	CLIC5	A	3.17842	-1.04237	-1.06348	-1.07257
ENSG00000227877	MRLN	A	3.14659	-1.04886	-1.04886	-1.04886
ENSG00000284269	MIR7855	A	3.12945	-1.04315	-1.04315	-1.04315
ENSG00000130957	FBP2	A	3.12455	-1.05129	-1.03122	-1.04204
ENSG00000115593	SMYD1	A	3.12225	-1.03914	-1.04298	-1.04013
ENSG00000197321	SVIL	A	2.56524	-2.52187	-0.134179	0.0908073
ENSG00000164122	ASB5	A	3.10787	-1.04257	-1.02923	-1.03607
ENSG00000010282	HHATL ENSG00000010282	A	3.08359	-1.00486	-1.04732	-1.0314
ENSG00000120738	EGR1	A	2.61856	0.546745	-2.0778	-1.08751
ENSG00000108878	CACNG1	A	3.0552	-1.00989	-1.02266	-1.02266
ENSG00000106992	AK1	A	2.85531	0.0397424	-1.27796	-1.61709
ENSG00000081248	CACNA1S	A	3.04372	-1.01341	-1.01619	-1.01412
ENSG00000288237	H19	A	2.32061	1.06968	-1.68433	-1.70596
ENSG00000178821	TMEM52	A	3.01584	-1.14194	-1.0309	-0.843003
ENSG00000157119	KLHL40 ENSG00000157119	A	3.019	-1.00633	-1.00633	-1.00633
ENSG00000117115	PADI2	A	2.95769	-0.422681	-1.29257	-1.24243
ENSG00000169271	HSPB3	A	2.97846	-1.0059	-0.966665	-1.0059
TRNR	NA	A	2.19618	0.537979	-0.155974	-2.57819
ENSG00000177354	C10orf71	A	2.97018	-0.993338	-0.988211	-0.988626
ENSG00000182054	IDH2	A	2.57693	0.529989	-1.63496	-1.47196
ENSG00000122477	LRRC39	A	2.95446	-0.891528	-1.0349	-1.02804
ENSG00000164776	PHKG1 ENSG00000164776	A	2.94183	-0.776652	-1.0841	-1.08107
ENSG00000112183	RBM24	A	2.93725	-0.947017	-0.98643	-1.0038
ENSG00000170323	FABP4	A	2.85301	-0.3436	-1.26148	-1.24793
ENSG00000079739	PGM1	A	2.69776	-1.86184	-0.271039	-0.564874
ENSG00000072195	SPEG	A	2.88909	-0.916204	-0.986275	-0.986607
ENSG00000104369	JPH1	A	2.85716	-0.550582	-1.14142	-1.16516
ENSG00000184544	DHRS7C	A	2.8847	-0.961566	-0.961566	-0.961566
WRB-SH3BGR	NA	A	2.87401	-0.919959	-1.05078	-0.903275
ENSG00000123689	G0S2	A	1.48565	-2.53472	1.4635	-0.414425
ENSG00000167676	PLIN4	A	2.8588	-0.986657	-0.923759	-0.948385
ENSG00000133454	MYO18B	A	2.84091	-0.94697	-0.94697	-0.94697
ENSG00000132429	POPDC3	A	2.84084	-0.946945	-0.946945	-0.946945
ENSG00000141161	UNC45B	A	2.82187	-0.937141	-0.936259	-0.948473
ENSG00000250722	SELENOP	A	2.39464	0.59876	-1.4867	-1.50671
ENSG00000163827	LRRC2	A	2.70685	-0.194948	-1.25699	-1.25491
ENSG00000155792	DEPTOR	A	2.7694	-0.533468	-1.26427	-0.971657
ENSG00000170681	CAVIN4	A	2.80261	-1.0268	-0.876174	-0.899639
ENSG00000167549	CORO6	A	2.7466	-0.594119	-0.917951	-1.23453
ENSG00000172458	IL17D	A	2.75575	-0.872101	-0.909313	-0.974331
LOC101929592	NA	A	2.75124	-0.917079	-0.917079	-0.917079
ENSG00000198892	SHISA4	A	2.7416	-1.02795	-1.00267	-0.710992
ENSG00000130005	GAMT	A	2.62267	-0.118861	-1.36407	-1.13974
ENSG00000160539	PLPP7	A	2.73785	-0.75829	-0.983272	-0.996291
ENSG00000166317	SYNPO2L	A	2.73403	-0.906921	-0.91507	-0.912037
ENSG00000215187	FAM166B	A	2.72467	-0.885558	-0.924624	-0.914493
ENSG00000197616	MYH6	A	2.72146	-0.910348	-0.900687	-0.910426
ENSG00000103994	ZNF106	A	2.67375	-0.422173	-1.15869	-1.09289
ENSG00000198624	CCDC69	A	2.70284	-0.666499	-1.01753	-1.01881
ENSG00000140416	TPM1	A	2.43081	-1.91853	-0.438766	-0.0735155
ENSG00000160097	FNDC5	A	2.68482	-0.635752	-1.05085	-0.998215
ENSG00000136842	TMOD1	A	2.67258	-1.1532	-0.96352	-0.555853
ENSG00000154415	PPP1R3A	A	2.68765	-0.901635	-0.887609	-0.898401
ENSG00000151632	AKR1C2	A	2.67632	-1.00439	-0.966595	-0.705336
ENSG00000170634	ACYP2 ENSG00000170634	A	2.07405	0.909476	-1.4365	-1.54703
ENSG00000211445	GPX3	A	2.53687	-0.0715252	-1.1956	-1.26975
ENSG00000138347	MYPN	A	2.50218	-1.62003	-0.120354	-0.761802
ENSG00000284094	MIR6073	A	2.54205	-0.107813	-1.21712	-1.21712
ENSG00000081189	MEF2C	A	2.45471	0.0745329	-1.09448	-1.43476
ENSG00000170345	FOS	A	2.08999	0.773863	-1.11463	-1.74922
ENSG00000143028	SYPL2	A	2.6186	-0.825805	-0.896398	-0.896398
ENSG00000152556	PFKM	A	2.56906	-1.30562	-0.588231	-0.675212
ENSG00000060138	YBX3	A	2.54916	-0.393677	-0.84975	-1.30573
ENSG00000146147	MLIP	A	2.60643	-0.860742	-0.872844	-0.872844
ENSG00000101400	SNTA1	A	2.59104	-1.06053	-0.905362	-0.625143
ENSG00000136732	GYPC	A	2.2428	0.476216	-1.35951	-1.35951
LINC01372	NA	A	2.51792	-0.352192	-0.962517	-1.20321
ENSG00000284005	MIR6084	A	2.55415	-1.09835	-0.672039	-0.783764
ENSG00000182533	CAV3	A	2.56828	-0.850844	-0.863382	-0.854056
ENSG00000165912	PACSIN3	A	2.02325	0.788205	-1.16954	-1.64191
ENSG00000102683	SGCG	A	2.56063	-0.810068	-0.879019	-0.871542
ENSG00000154358	OBSCN	A	2.55865	-0.862855	-0.873241	-0.82255
ENSG00000067191	CACNB1	A	2.52373	-0.638042	-0.953967	-0.93172
ENSG00000071282	LMCD1	A	2.4982	-0.476389	-1.068	-0.953815
ENSG00000127824	TUBA4A	A	1.73509	-2.28661	0.150144	0.401382
ENSG00000159348	CYB5R1	A	2.49986	-0.682158	-0.803513	-1.01418
ENSG00000170162	VGLL2	A	2.50624	-0.837826	-0.837826	-0.830584
ENSG00000058056	USP13	A	2.48622	-0.968989	-0.722109	-0.795126
ENSG00000091436	MAP3K20	A	2.44012	-1.26318	-0.481596	-0.695336
ENSG00000085662	AKR1B1	A	1.85996	0.775553	-0.758366	-1.87715
MHRT	NA	A	2.47339	-0.824462	-0.824462	-0.824462
ENSG00000118729	CASQ2	A	2.44848	-0.785281	-0.833892	-0.829308
LOC101929367	NA	A	2.4478	-0.815933	-0.815933	-0.815933
TRNM	NA	A	2.2808	-0.0240564	-0.810078	-1.44667
ENSG00000054523	KIF1B ENSG00000054523	A	2.39808	-0.389815	-0.937165	-1.0711
ENSG00000183785	TUBA8	A	2.3845	-0.333946	-1.07488	-0.975666
ENSG00000163833	FBXO40	A	2.42564	-0.808547	-0.808547	-0.808547
ENSG00000118804	STBD1	A	2.38622	-0.404411	-0.925446	-1.05636
ENSG00000136383	ALPK3	A	2.42005	-0.72335	-0.862992	-0.833705
ENSG00000174429	ABRA	A	2.41355	-0.787772	-0.808001	-0.817773
ENSG00000198363	ASPH	A	2.40521	-0.689554	-0.940673	-0.774984
LOC100287653	NA	A	2.3915	-0.581311	-0.881993	-0.928199
ENSG00000187642	PERM1	A	2.39728	-0.803155	-0.803155	-0.790967
ENSG00000214097	SMCO1	A	2.39398	-0.800298	-0.800298	-0.793383
ENSG00000143365	RORC	A	2.39314	-0.785716	-0.807839	-0.799581
ENSG00000172731	LRRC20	A	2.38704	-0.85808	-0.834775	-0.694182
ENSG00000163820	FYCO1	A	2.37117	-0.536428	-0.998184	-0.836559
ENSG00000166343	MSS51	A	2.38637	-0.813237	-0.80783	-0.765305
ENSG00000236208	C10orf71-AS1	A	2.38455	-0.794851	-0.794851	-0.794851
ENSG00000162688	AGL	A	2.38191	-0.809798	-0.87081	-0.701302
ENSG00000055955	ITIH4	A	2.19817	0.134986	-1.16627	-1.16689
ENSG00000272414	FAM47E-STBD1	A	2.34695	-0.404421	-0.907989	-1.03454
ENSG00000163431	LMOD1	A	2.30555	-0.204578	-1.04705	-1.05392
ENSG00000143434	SEMA6C	A	2.29685	-0.204308	-1.07992	-1.01262
ENSG00000132329	RAMP1	A	2.19047	0.125814	-1.14192	-1.17436
ENSG00000077009	NMRK2	A	2.34532	-0.781772	-0.781772	-0.781772
ENSG00000184343	SRPK3	A	2.33979	-0.701217	-0.819288	-0.819288
ENSG00000125744	RTN2	A	2.29512	-0.353649	-1.08284	-0.858633
ENSG00000141965	FEM1A	A	2.33066	-0.773324	-0.862718	-0.694616
ENSG00000107537	PHYH	A	2.00766	0.428505	-1.36511	-1.07106
LOC100996723	NA	A	2.32121	-0.712277	-0.804467	-0.804467
ENSG00000223609	HBD	A	2.30073	-0.633036	-0.833846	-0.833846
ENSG00000149596	JPH2	A	2.29496	-0.704548	-0.779595	-0.810812
ENSG00000152137	HSPB8	A	2.226	-0.229469	-1.10754	-0.889
ENSG00000135424	ITGA7	A	2.23384	-0.270012	-0.982361	-0.981466
ENSG00000143164	DCAF6	A	2.25029	-1.06485	-0.765747	-0.419693
ENSG00000152642	GPD1L ENSG00000152642	A	2.25309	-0.538951	-1.0073	-0.706833
ENSG00000078328	RBFOX1	A	2.26984	-0.750802	-0.759521	-0.759521
ENSG00000029534	ANK1	A	2.00036	0.157982	-1.56379	-0.594549
ENSG00000167779	IGFBP6	B	-1.08832	5.61923	-2.19159	-2.33932
ENSG00000164692	COL1A2	B	-1.24647	5.40585	-1.73325	-2.42612
ENSG00000152583	SPARCL1	B	0.84822	4.59643	-2.68014	-2.76451
ENSG00000104368	PLAT	B	-2.7908	4.90965	-1.50694	-0.611906
ENSG00000136160	EDNRB	B	-1.52102	5.07086	-1.65418	-1.89566
ENSG00000240583	AQP1 ENSG00000240583	B	0.799049	4.13871	-2.53957	-2.3982
ENSG00000108821	COL1A1 ENSG00000108821	B	-3.41437	3.64261	1.36692	-1.59515
ENSG00000133110	POSTN	B	-1.16047	4.49679	-1.61103	-1.72529
ENSG00000170017	ALCAM	B	-1.5595	4.49394	-1.40247	-1.53197
ENSG00000168542	COL3A1	B	-0.996957	4.42797	-1.31734	-2.11367
ENSG00000154146	NRGN	B	-1.41774	4.45879	-1.5549	-1.48614
ENSG00000105664	COMP	B	-1.40868	4.43372	-1.50159	-1.52345
ENSG00000115414	FN1	B	-1.16025	4.35467	-1.47346	-1.72096
ENSG00000179046	TRIML2	B	-1.43294	4.3319	-1.43879	-1.46017
ENSG00000182492	BGN	B	-0.86084	4.19206	-1.65127	-1.67995
ENSG00000142583	SLC2A5	B	-0.209772	4.03632	-1.91269	-1.91386
ENSG00000284412	MIR4649	B	-0.947233	4.14086	-1.59681	-1.59681
ENSG00000161249	DMKN	B	-1.37328	4.11984	-1.37328	-1.37328
ENSG00000130203	APOE	B	-0.998899	4.08476	-1.26905	-1.81682
ENSG00000211592	IGKC	B	-1.0252	4.06027	-1.51754	-1.51754
ENSG00000158747	NBL1	B	-2.08423	3.96113	-1.14934	-0.727562
ENSG00000129521	EGLN3	B	-1.00669	3.97088	-1.42839	-1.53581
ENSG00000143320	CRABP2	B	-1.86016	3.88257	-0.971926	-1.05049
ENSG00000170955	CAVIN3	B	-0.398768	3.77358	-1.6616	-1.71321
ENSG00000143127	ITGA10	B	-2.41341	3.64514	-0.766383	-0.465351
ENSG00000063660	GPC1 ENSG00000063660	B	0.476092	3.43952	-1.89324	-2.02236
ENSG00000166165	CKB	B	-1.32068	3.74829	-0.671659	-1.75596
ENSG00000130222	GADD45G	B	0.0876938	3.51972	-1.8026	-1.80482
ENSG00000187151	ANGPTL5	B	-1.25881	3.76402	-1.25381	-1.2514
ENSG00000197614	MFAP5	B	-1.61722	3.67297	-1.58732	-0.468423
ENSG00000284180	MIR3606	B	-0.109302	3.5787	-1.7347	-1.7347
ENSG00000185201	IFITM2	B	-1.97826	3.64386	-1.11578	-0.549827
ENSG00000184702	SEPTIN5	B	-1.12239	3.72487	-1.24634	-1.35615
ENSG00000129353	SLC44A2	B	0.0757292	3.4686	-2.04012	-1.50421
ENSG00000137463	MGARP ENSG00000137463	B	-1.26438	3.70129	-1.25649	-1.18043
ENSG00000168899	VAMP5	B	1.77588	2.465	-2.24915	-1.99174
ENSG00000156298	TSPAN7	B	0.951121	2.93821	-1.48398	-2.40535
SEPT5-GP1BB	NA	B	-1.11278	3.61634	-1.21117	-1.29238
ENSG00000162576	MXRA8	B	-0.583693	3.55649	-1.50105	-1.47175
ENSG00000148180	GSN	B	-0.191108	3.43057	-1.91563	-1.32383
ENSG00000124212	PTGIS	B	-1.23059	3.5826	-1.3117	-1.04031
ENSG00000099260	PALMD	B	1.19661	2.75182	-1.93188	-2.01656
ENSG00000169231	THBS3	B	-2.73501	3.01871	-0.21784	-0.0658596
ENSG00000203618	GP1BB	B	-1.09566	3.4876	-1.19377	-1.19818
ENSG00000171246	NPTX1	B	-1.12387	3.47662	-1.17598	-1.17678
ENSG00000163359	COL6A3	B	-0.67093	3.3988	-1.35918	-1.36869
ENSG00000106538	RARRES2	B	-0.695213	3.3698	-1.34865	-1.32594
ENSG00000123358	NR4A1	B	1.66316	2.23635	-1.9094	-1.99011
ENSG00000283944	MIR4709	B	-1.65576	3.22742	-0.125017	-1.44665
ENSG00000106624	AEBP1	B	-0.907264	3.30149	-0.912139	-1.48209
ENSG00000148344	PTGES	B	-1.16033	3.30298	-1.05263	-1.09002
ENSG00000260549	MT1L	B	-0.847371	3.28885	-1.23516	-1.20632
ENSG00000139329	LUM	B	-0.641664	3.26146	-1.30486	-1.31494
ENSG00000276830	MIR6730	B	-1.2514	3.27818	-1.2514	-0.775384
ENSG00000065717	TLE2	B	0.266553	2.98949	-1.73373	-1.52232
ENSG00000035862	TIMP2	B	-1.34949	3.12798	-1.61207	-0.166409
ENSG00000104415	CCN4	B	-1.20662	3.25615	-0.993617	-1.05592
ENSG00000270136	MICOS10-NBL1	B	-1.58951	3.20828	-0.879428	-0.739339
ENSG00000189320	FAM180A	B	-1.07473	3.25579	-1.09402	-1.08704
ENSG00000211594	IGKJ4	B	-1.07839	3.23516	-1.07839	-1.07839
ENSG00000170276	HSPB2	B	1.63356	2.05407	-1.82704	-1.86059
ENSG00000169919	GUSB	B	-1.81294	3.08565	-0.710155	-0.56255
ENSG00000137077	CCL21	B	-0.927972	3.19233	-1.13218	-1.13218
ENSG00000011600	TYROBP ENSG00000011600	B	-0.905523	3.18744	-1.14096	-1.14096
ENSG00000225383	SFTA1P	B	-1.07577	3.18887	-1.03732	-1.07577
ENSG00000100234	TIMP3	B	0.342807	2.85215	-1.2961	-1.89886
ENSG00000207773	MIR642A	B	-1.05984	3.17951	-1.05984	-1.05984
ENSG00000277387	MIR8058	B	-1.05984	3.17951	-1.05984	-1.05984
ENSG00000005102	MEOX1	B	-0.61382	3.14062	-1.2634	-1.2634
ENSG00000100985	MMP9	B	-1.08327	3.14497	-1.06944	-0.992263
ENSG00000108691	CCL2	B	-0.0383749	2.957	-1.63804	-1.28058
ENSG00000113296	THBS4	B	0.364178	2.80403	-1.49044	-1.67776
ENSG00000163947	ARHGEF3	B	-1.26936	3.11353	-0.963772	-0.880397
ENSG00000183087	GAS6	B	0.397753	2.78646	-1.53903	-1.64519
ENSG00000160013	PTGIR	B	-1.10119	3.10228	-0.999378	-1.00171
ENSG00000101134	DOK5	B	-0.102979	2.94874	-1.41866	-1.4271
ENSG00000216490	IFI30 ENSG00000216490	B	-1.23653	3.07829	-1.01851	-0.823257
ENSG00000185885	IFITM1	B	-2.2287	2.70567	-0.634692	0.157728
ENSG00000010310	GIPR	B	-1.06889	3.08158	-1.01179	-1.0009
ENSG00000021300	PLEKHB1	B	-0.987922	3.05707	-1.27204	-0.797105
ENSG00000278608	MAMDC2	B	-0.902554	3.05498	-1.03678	-1.11565
ENSG00000227097	RPS28P7	B	1.07086	2.33747	-1.67839	-1.72994
ENSG00000140945	CDH13	B	0.253142	2.77637	-1.51246	-1.51705
ENSG00000125844	RRBP1	B	-1.73868	2.92933	-0.714019	-0.476633
ENSG00000103154	NECAB2	B	-1.00543	3.0382	-1.01639	-1.01639
ENSG00000111907	TPD52L1	B	0.981776	2.36918	-1.68716	-1.6638
ENSG00000090104	RGS1	B	-1.9122	2.74322	0.157568	-0.988588
ENSG00000205364	MT1M	B	-0.854799	2.98709	-0.802551	-1.32974
ENSG00000211676	IGLJ2	B	-0.998295	2.99489	-0.998295	-0.998295
ENSG00000067113	PLPP1	B	-0.331208	2.89265	-1.1975	-1.36395
ENSG00000188293	IGFL1	B	-0.99852	2.96405	-0.99852	-0.967014
ENSG00000149591	TAGLN	B	-0.0529787	2.79055	-1.37441	-1.36316
ENSG00000145423	SFRP2	B	-1.81159	2.35786	0.851727	-1.398
ENSG00000176170	SPHK1	B	-1.38308	2.87223	-0.399223	-1.08993
ENSG00000211597	IGKJ1	B	-0.709418	2.91682	-1.1037	-1.1037
ENSG00000111341	MGP	B	0.100616	2.71557	-1.41184	-1.40434
ENSG00000136068	FLNB	B	-1.97362	2.66339	-0.240644	-0.449125
ENSG00000158869	FCER1G	B	-1.03569	2.88136	-0.885436	-0.96024
ENSG00000116016	EPAS1	B	0.202232	2.55922	-0.810962	-1.95049
ENSG00000128567	PODXL	B	-1.83669	2.66908	-0.143072	-0.689326
ENSG00000142552	RCN3	B	-1.41637	2.8115	-0.841299	-0.553831
ENSG00000141433	ADCYAP1	B	-0.951827	2.85861	-0.957394	-0.949384
ENSG00000089225	TBX5	B	-0.950236	2.85304	-0.947207	-0.955592
ENSG00000143369	ECM1	B	-1.94177	2.41297	0.48044	-0.951646
ENSG00000115594	IL1R1	B	-0.391563	2.77551	-1.07931	-1.30464
ENSG00000178752	ERFE	B	-1.24248	2.78669	-0.46202	-1.08219
ENSG00000011465	DCN	B	0.931971	2.20502	-1.4894	-1.64759
ENSG00000050767	COL23A1	B	-0.895722	2.82263	-0.974594	-0.952316
ENSG00000087258	GNAO1	B	-0.906418	2.8209	-0.951609	-0.962869
ENSG00000182326	C1S	B	-1.36218	2.36589	0.635016	-1.63873
ENSG00000065320	NTN1	B	-1.01449	2.80325	-0.937834	-0.850932
ENSG00000222041	CYTOR	B	-2.06336	2.46457	-0.0728135	-0.328394
ENSG00000050165	3	B	-1.00135	2.76799	-1.16761	-0.599029
ENSG00000130635	COL5A1	B	-0.828332	2.78842	-0.942343	-1.01774
ENSG00000200879	SNORD14E	B	-1.59818	2.55694	0.121067	-1.07983
ENSG00000166033	HTRA1	B	-0.682974	2.76121	-1.09327	-0.984967
ENSG00000092964	DPYSL2	B	-0.623342	2.7451	-1.25676	-0.865001
ENSG00000207864	MIR27B	B	-1.46703	2.35595	-1.46703	0.578117
ENSG00000167244	IGF2	B	0.41812	2.42538	-1.27767	-1.56583
ENSG00000101335	MYL9	B	-0.66939	2.71861	-1.1104	-0.938825
ENSG00000119655	NPC2	B	-1.22842	2.6687	-0.344371	-1.09591
ENSG00000162496	DHRS3	B	-1.01607	2.67688	-0.405537	-1.25528
ENSG00000175899	A2M	B	1.41356	1.70155	-1.55466	-1.56044
ENSG00000148175	STOM	B	-0.189952	2.58819	-1.41191	-0.986328
ENSG00000163701	IL17RE ENSG00000163701	B	-1.24029	2.65554	-0.824076	-0.591172
ENSG00000211674	IGLJ1	B	-0.895187	2.68556	-0.895187	-0.895187
ENSG00000172935	MRGPRF	B	-0.864987	2.67827	-0.980011	-0.833277
ENSG00000196843	ARID5A	B	-0.594257	2.65708	-0.917395	-1.14543
ENSG00000101096	NFATC2	B	-0.788483	2.67513	-0.975333	-0.911311
ENSG00000154096	THY1	B	-0.760651	2.67161	-0.955479	-0.955479
ENSG00000277263	HLA-DRA	B	-0.469606	2.63586	-1.07228	-1.09398
RPL29P4	NA	B	0.698152	2.19687	-1.40778	-1.48724
ENSG00000136235	GPNMB	B	0.154	2.45468	-1.30744	-1.30124
ENSG00000106819	ASPN	B	-0.832203	2.63637	-0.652453	-1.15171
ENSG00000224259	LINC01133	B	-0.881994	2.65257	-0.873519	-0.897056
ENSG00000185567	AHNAK2	B	-1.90249	2.35644	-0.364115	-0.0898413
ENSG00000066248	NGEF	B	-1.40582	2.50359	-0.0680087	-1.02976
ENSG00000129965	INS-IGF2	B	0.368487	2.33945	-1.22545	-1.48249
ENSG00000131480	AOC2	B	-0.981383	2.63783	-0.748869	-0.907577
ENSG00000106483	SFRP4	B	-0.687928	2.62935	-0.970709	-0.970709
ENSG00000160801	PTH1R	B	-0.738257	2.62656	-0.923728	-0.964577
ENSG00000213694	S1PR3	B	-1.35048	2.56386	-0.395276	-0.818107
ENSG00000178038	ALS2CL	B	-0.684196	2.61968	-0.981479	-0.954008
ENSG00000143387	CTSK	B	-1.22234	2.58395	-0.64846	-0.713157
ENSG00000284246	MIR6716	B	-1.7803	2.36871	-0.491156	-0.0972558
ENSG00000077943	ITGA8	B	-0.685344	2.59302	-0.955733	-0.951947
ENSG00000038427	VCAN	B	-0.949677	2.57245	-0.564736	-1.05804
ENSG00000102901	CENPT	B	-1.76934	2.34816	-0.129601	-0.44922
ENSG00000125148	MT2A	B	-0.889444	1.7482	1.08328	-1.94204
ENSG00000102575	ACP5	B	-0.853131	2.56481	-0.84613	-0.865554
ENSG00000111186	WNT5B	B	-0.981775	2.55591	-0.671348	-0.902791
ENSG00000078098	FAP	B	-0.981138	2.51781	-0.456752	-1.07992
ENSG00000133874	RNF122	B	-0.725045	2.53786	-0.939421	-0.873391
ENSG00000221502	MIR1245A	B	-0.84357	2.53071	-0.84357	-0.84357
ENSG00000159189	C1QC	B	-0.729357	2.52507	-0.897857	-0.897857
ENSG00000123360	PDE1B	B	-0.801248	2.52566	-0.843028	-0.881386
ENSG00000240184	PCDHGC3	B	-1.97873	2.13275	0.041562	-0.195587
ENSG00000148798	INA	B	-0.854304	2.51857	-0.813111	-0.85116
LOC112268278	NA	B	-0.832175	2.51673	-0.867778	-0.81678
ENSG00000064042	LIMCH1	B	1.3415	1.55712	-1.44784	-1.45078
ENSG00000234456	MAGI2-AS3	B	-0.471449	2.47164	-0.992106	-1.00808
ENSG00000101850	GPR143	B	-1.39599	2.40493	-0.306137	-0.702801
ENSG00000284258	MIR8085	B	-1.62341	2.29934	-0.0529437	-0.62299
ENSG00000111348	ARHGDIB	B	0.317201	2.22765	-1.24393	-1.30093
ENSG00000106333	PCOLCE	B	-1.21986	2.43884	-0.386393	-0.832586
ENSG00000211675	IGLC1	B	-0.829397	2.48819	-0.829397	-0.829397
ENSG00000186340	THBS2	B	-0.811844	2.47343	-0.830851	-0.830735
ENSG00000120156	TEK	B	-0.22991	2.3926	-1.03295	-1.12973
ENSG00000074855	ANO8	B	-0.841136	2.45686	-0.952534	-0.663189
ENSG00000136143	SUCLA2	B	0.542273	2.07928	-1.41312	-1.20843
ENSG00000283791	MIR612	B	-1.33508	1.54803	-1.49626	1.28331
ENSG00000105472	CLEC11A	B	-1.79836	2.17316	-0.188571	-0.186226
ENSG00000152377	SPOCK1	B	-0.168532	2.36029	-1.09245	-1.09931
ENSG00000134917	ADAMTS8 ENSG00000134917	B	-0.694406	2.4446	-0.898747	-0.851451
ENSG00000153721	CNKSR3	B	-1.64552	2.24775	-0.438041	-0.164181
ENSG00000128274	A4GALT	B	-0.780479	2.44293	-0.841065	-0.821384
ENSG00000178726	THBD	B	1.43997	1.3746	-1.30658	-1.50799
ENSG00000106823	ECM2	B	-0.491117	2.4047	-0.948466	-0.965122
ENSG00000207118	SNORD14D	B	-1.63937	2.21719	-0.0915116	-0.486312
ENSG00000140545	MFGE8	B	1.00665	1.7397	-1.32433	-1.42202
ENSG00000121898	CPXM2	B	-0.664309	2.41148	-0.870683	-0.87649
ENSG00000123104	ITPR2	B	-1.01073	2.4014	-0.723702	-0.666961
ENSG00000159212	CLIC6	B	-0.603372	2.40269	-0.902608	-0.896708
ENSG00000125740	FOSB	B	1.46198	1.31779	-1.37649	-1.40329
ENSG00000131100	ATP6V1E1	B	-0.728911	2.40507	-0.80586	-0.870303
ENSG00000211593	IGKJ5	B	-0.801338	2.40401	-0.801338	-0.801338
ENSG00000158555	GDPD5	B	-0.776257	2.39698	-0.857037	-0.763686
ENSG00000282986	EIF3K	B	-0.763398	2.39209	-0.706397	-0.922292
ENSG00000134853	PDGFRA	B	-0.585277	2.37997	-0.872204	-0.922492
ENSG00000186204	CYP4F12	B	-0.632664	2.37604	-0.871689	-0.871689
ENSG00000164949	GEM	B	-0.711956	2.37473	-0.807351	-0.855421
ENSG00000131620	ANO1	B	-0.526915	2.35874	-0.916814	-0.915016
ENSG00000113140	SPARC	B	-1.7227	2.11208	-0.279488	-0.109888
ENSG00000166250	CLMP	B	-0.750029	2.36833	-0.810382	-0.807919
ENSG00000101439	CST3	B	0.977713	1.70008	-1.29843	-1.37937
ENSG00000042493	CAPG	B	-1.08058	2.31884	-0.371848	-0.866414
ENSG00000071967	CYBRD1	B	-0.0555136	2.24067	-1.09231	-1.09285
ENSG00000104881	PPP1R13L	B	-1.59096	2.14847	-0.0626142	-0.494895
ENSG00000141753	IGFBP4	B	-0.033483	2.20496	-0.815502	-1.35598
ENSG00000173369	C1QB	B	-0.662711	2.34212	-0.839702	-0.839702
ENSG00000163702	IL17RC	B	-0.91672	2.32002	-0.899112	-0.504187
ENSG00000159674	SPON2	B	-0.363704	2.29099	-0.966833	-0.960454
ENSG00000266235	MIR3176	B	-1.41935	2.19059	-0.139083	-0.632153
ENSG00000154856	APCDD1	B	-0.68142	2.32664	-0.820696	-0.824521
ENSG00000164932	CTHRC1	B	-1.6163	1.99471	0.326604	-0.70502
ENSG00000230838	LINC01614	B	-0.77251	2.31753	-0.77251	-0.77251
ENSG00000158286	RNF207	B	-1.65479	2.07297	-0.344823	-0.0733544
ENSG00000140279	DUOX2	B	-1.38752	2.13289	-0.817976	0.0726025
ENSG00000206237	HLA-DQB1	B	-0.690586	2.30674	-0.712751	-0.903407
ENSG00000100097	LGALS1	B	-0.953587	2.10739	0.162023	-1.31583
ENSG00000174059	CD34	B	-0.703706	2.28046	-1.06767	-0.509082
ENSG00000074181	NOTCH3	B	0.145056	2.11887	-1.12968	-1.13424
ENSG00000138615	CILP	B	-0.334104	2.25872	-0.96632	-0.958295
ENSG00000121966	CXCR4	B	-1.1667	2.20927	-0.160214	-0.882353
ENSG00000173372	C1QA	B	-0.682395	2.28941	-0.803508	-0.803508
ENSG00000119771	KLHL29	B	-0.286387	2.23448	-0.954056	-0.994035
ENSG00000253873	PCDHGA11	B	-1.72896	1.9768	-0.0173781	-0.230462
ENSG00000265874	MIR4489	B	-0.480184	2.24452	-1.12976	-0.634571
ENSG00000169026	SLC49A3 ENSG00000169026	B	-0.789896	2.27561	-0.646633	-0.83908
ENSG00000163053	SLC16A14	B	-0.818336	2.2773	-0.75445	-0.704518
ENSG00000284067	MIR6837	B	-0.844409	1.95501	0.38339	-1.49399
ENSG00000198542	ITGBL1	B	-0.70824	2.27435	-0.762819	-0.803291
ENSG00000138080	EMILIN1	B	-0.57303	2.25759	-0.847713	-0.836844
ENSG00000253159	PCDHGA12	B	-1.66142	1.99678	-0.0585849	-0.276783
ENSG00000129538	RNASE1	B	1.23513	1.37094	-1.30304	-1.30304
MIR9898	NA	C	-6.63826	2.92575	1.95473	1.75777
ENSG00000111057	KRT18	C	-6.01451	2.81541	1.62111	1.57799
ENSG00000170421	KRT8	C	-5.82207	2.63441	1.68761	1.50006
ENSG00000118785	SPP1	C	-5.03328	0.590833	2.57735	1.8651
ENSG00000283498	MIR1244-2	C	-4.52548	1.40754	2.51134	0.606601
ENSG00000163191	S100A11	C	-4.37895	1.85515	1.23759	1.28621
ENSG00000283803	MIR3198-2	C	-4.19576	0.705175	1.46731	2.02328
ENSG00000102265	TIMP1	C	-3.6345	3.28857	0.160059	0.185871
ENSG00000026025	VIM	C	-3.92916	0.427465	1.84997	1.65173
ENSG00000034510	TMSB10	C	-3.93778	1.56801	1.51872	0.85105
ENSG00000283938	MIR3917	C	-3.73126	0.0627679	1.52762	2.14087
ENSG00000197747	S100A10	C	-3.78223	2.32136	0.725458	0.735405
SNORD141A	NA	C	-3.72445	0.292245	2.31943	1.11278
ENSG00000130066	SAT1	C	-3.63036	2.4843	0.992911	0.153154
ENSG00000142669	SH3BGRL3	C	-3.52086	2.65073	0.611265	0.258857
ENSG00000182718	ANXA2	C	-3.72716	2.06431	0.715008	0.947841
ENSG00000175063	UBE2C	C	-3.53933	-0.187198	2.01304	1.7135
ENSG00000074800	ENO1 ENSG00000074800	C	-3.67793	0.25118	1.79786	1.62889
ENSG00000106366	SERPINE1 ENSG00000106366	C	-3.50097	2.25156	1.36295	-0.113535
ENSG00000130429	ARPC1B	C	-3.67128	0.810107	1.452	1.40917
ENSG00000110492	MDK	C	-3.18112	1.68388	2.11712	-0.619876
ENSG00000157227	MMP14	C	-3.54202	0.422709	1.6507	1.46861
ENSG00000196154	S100A4	C	-3.36363	2.20421	0.0122011	1.14722
ENSG00000103187	COTL1	C	-3.54044	0.611192	1.454	1.47525
ENSG00000196975	ANXA4	C	-3.29802	2.37063	0.787236	0.140152
ENSG00000167644	C19orf33	C	-3.45553	0.278925	1.58558	1.59103
SNORD47	NA	C	-3.38147	0.281163	1.94246	1.15785
ENSG00000122862	SRGN	C	-2.98561	2.70425	0.373239	-0.0918772
ENSG00000142156	COL6A1	C	-2.92593	2.72742	-0.0595242	0.258037
ENSG00000213145	CRIP1	C	-3.36017	1.87492	1.01686	0.468392
ENSG00000005022	SLC25A5	C	-3.42751	0.669132	1.28044	1.47794
ENSG00000156508	EEF1A1	C	-3.42148	0.671372	1.51521	1.2349
ENSG00000284378	MIR1244-1	C	-3.38854	1.76821	0.961193	0.659142
ENSG00000010278	CD9	C	-3.35896	1.83209	0.558976	0.967891
ENSG00000075624	ACTB	C	-3.40646	1.52356	0.722215	1.16068
MIR10399	NA	C	-3.3225	0.364452	1.15593	1.80212
ENSG00000142089	IFITM3	C	-2.74406	2.85915	-0.175552	0.0604542
ENSG00000105974	CAV1	C	-3.176	-0.0989717	1.53681	1.73817
ENSG00000140931	CMTM3	C	-3.18084	-0.0809358	1.55707	1.70471
ENSG00000175793	SFN	C	-3.37284	0.82403	1.41163	1.13718
ENSG00000159335	PTMS ENSG00000159335	C	-3.37614	1.3677	0.954549	1.05389
ENSG00000196262	PPIA	C	-3.3582	0.971446	1.27775	1.10901
ENSG00000142227	EMP3	C	-3.3518	0.960549	1.31676	1.07448
ENSG00000111775	COX6A1	C	-3.28861	0.652149	1.54844	1.08802
ENSG00000011422	PLAUR	C	-3.22822	0.32365	1.5055	1.39908
ENSG00000205542	TMSB4X	C	-3.22492	1.02764	0.436078	1.7612
ENSG00000166794	PPIB	C	-3.30014	1.06055	1.32401	0.915574
ENSG00000169908	TM4SF1	C	-3.25166	1.63296	0.808339	0.810362
ENSG00000185499	MUC1	C	-3.20477	1.78488	0.593121	0.826775
ENSG00000148926	ADM	C	-2.5695	2.51994	0.86743	-0.817866
ENSG00000184009	ACTG1	C	-3.147	0.181033	1.35349	1.61247
ENSG00000092820	EZR	C	-3.25001	1.38021	1.02471	0.84509
SNORD76	NA	C	-3.11038	0.309663	1.86544	0.93528
ENSG00000141756	FKBP10	C	-3.18406	1.54883	0.759991	0.875237
ENSG00000099377	HSD3B7	C	-3.14206	1.68397	0.718791	0.739302
ENSG00000102317	RBM3	C	-3.1938	0.906856	0.896291	1.39065
ENSG00000197457	STMN3	C	-3.08412	0.195932	1.3553	1.53288
ENSG00000142173	COL6A2	C	-2.58664	2.62696	-0.0839048	0.0435875
ENSG00000187514	PTMA	C	-3.15022	1.49151	0.714708	0.944
ENSG00000284570	MIR7705	C	-3.09886	0.775516	1.65421	0.669133
ENSG00000198959	TGM2	C	-2.99137	1.75195	1.15076	0.0886606
ENSG00000116741	RGS2	C	-2.76173	0.259616	2.36547	0.136643
ENSG00000265917	MIR3685	C	-3.1053	0.586651	1.08809	1.43056
ENSG00000196205	EEF1A1P5	C	-2.99707	0.170471	1.72537	1.10123
ENSG00000115129	TP53I3	C	-2.95126	1.97053	0.415691	0.56504
ENSG00000108679	LGALS3BP ENSG00000108679	C	-2.97369	0.138516	1.10994	1.72523
ENSG00000117632	STMN1	C	-2.97436	0.132096	1.26357	1.5787
ENSG00000149257	SERPINH1	C	-3.10337	1.18683	0.908275	1.00827
ENSG00000135318	NT5E	C	-3.07643	0.668864	1.30531	1.10226
ENSG00000051523	CYBA	C	-2.91253	0.199949	1.90445	0.808133
ENSG00000088986	DYNLL1	C	-3.07883	0.856421	1.34355	0.878862
ENSG00000109113	RAB34	C	-2.92439	0.0690887	1.42088	1.43442
SNORD81	NA	C	-2.94341	0.557136	1.82719	0.55908
ENSG00000099194	SCD	C	-2.90995	1.85106	0.54074	0.518148
ENSG00000117519	CNN3	C	-2.656	2.27437	-0.00514584	0.386778
ENSG00000284191	MIR671	C	-2.96075	1.21249	1.42469	0.323566
ENSG00000176014	TUBB6	C	-2.99167	0.562745	1.36929	1.05964
ENSG00000062716	VMP1	C	-2.8965	1.78007	0.495171	0.621259
ENSG00000122861	PLAU	C	-2.81137	-0.035622	1.09375	1.75324
ENSG00000205581	HMGN1	C	-3.00996	1.13074	0.887985	0.991242
ENSG00000084234	APLP2	C	-2.78559	-0.0816632	1.1297	1.73756
ENSG00000196937	FAM3C	C	-2.78927	0.0502424	0.932602	1.80643
ENSG00000103490	PYCARD	C	-2.74892	1.93963	0.11932	0.689966
ENSG00000274816	MIR6772	C	-2.50478	2.08907	0.923656	-0.507955
ENSG00000070756	PABPC1	C	-2.76071	-0.00410697	1.51547	1.24934
ENSG00000144136	SLC20A1 ENSG00000144136	C	-2.84031	0.284101	1.34178	1.21443
ENSG00000025708	TYMP ENSG00000025708	C	-2.78427	1.45648	1.21186	0.115926
ENSG00000284564	MIR3064	C	-2.83038	0.646767	1.60514	0.578478
ENSG00000164924	YWHAZ	C	-2.8991	0.67663	1.05403	1.16844
ENSG00000249992	TMEM158	C	-2.67912	1.53814	1.32661	-0.18562
SNORD79	NA	C	-2.81597	0.418446	1.59014	0.807384
ENSG00000212498	SNORD86	C	-2.88869	0.651254	1.11765	1.11978
ENSG00000100316	RPL3	C	-2.8908	1.01835	1.12457	0.747872
ENSG00000089327	FXYD5	C	-2.55942	2.10151	0.409283	0.0486266
ENSG00000118523	CCN2	C	-2.68693	1.41215	-0.102351	1.37713
ENSG00000166888	STAT6	C	-2.77232	0.176142	1.21586	1.38031
ENSG00000147065	MSN	C	-2.52737	2.12855	0.284021	0.114801
ENSG00000087088	BAX	C	-2.85695	0.788554	1.23948	0.828919
ENSG00000160691	SHC1	C	-2.6076	1.99934	0.270177	0.338087
ENSG00000163399	ATP1A1	C	-2.32449	2.35202	-0.0383028	0.0107772
ENSG00000130208	APOC1	C	-2.48819	1.99292	0.81697	-0.321699
ENSG00000138119	MYOF	C	-2.80671	0.661741	0.72723	1.41774
ENSG00000284585	MIR4722	C	-2.54347	1.84828	0.943252	-0.248057
ENSG00000026297	RNASET2	C	-2.75215	0.700248	1.60006	0.451842
ENSG00000172757	CFL1	C	-2.80279	0.464813	1.14177	1.19621
ENSG00000108518	PFN1	C	-2.71066	0.179759	1.45256	1.07834
ENSG00000164611	PTTG1 ENSG00000164611	C	-2.59336	-0.175008	1.5487	1.21967
ENSG00000234741	GAS5	C	-2.67247	0.243551	1.69782	0.731103
ENSG00000277108	SNORD49B	C	-2.71483	0.181029	1.29169	1.24211
ENSG00000232573	RPL3P4	C	-2.72769	1.38865	1.08465	0.254399
ENSG00000198618	PPIAP22	C	-2.79733	0.61935	1.01427	1.16371
SNORA103	NA	C	-2.68691	0.207416	1.59341	0.886085
ENSG00000284190	MIR21	C	-2.76581	1.32024	0.888124	0.557445
ENSG00000188042	ARL4C	C	-2.77658	0.552458	1.13952	1.08459
ENSG00000104635	SLC39A14	C	-2.68225	1.44991	1.04617	0.186172
ENSG00000182481	KPNA2	C	-2.67162	0.193047	1.24873	1.22984
ENSG00000214063	TSPAN4	C	-2.72597	1.33498	0.551725	0.839264
ENSG00000134308	YWHAQ	C	-2.70037	1.37832	0.578538	0.743514
ENSG00000135046	ANXA1	C	-2.65642	1.49888	0.723488	0.43405
ENSG00000183255	PTTG1IP ENSG00000183255	C	-2.32859	2.13767	0.100274	0.0906532
ENSG00000162511	LAPTM5	C	-2.7164	1.10544	0.583862	1.0271
ENSG00000136810	TXN	C	-2.36681	2.0746	0.277471	0.0147349
ENSG00000231991	ANXA2P2 ENSG00000231991	C	-2.63776	1.51228	0.346942	0.778533
ENSG00000064666	CNN2	C	-2.59946	1.51926	0.191418	0.888781
ENSG00000136295	TTYH3	C	-2.5105	-0.12456	1.1052	1.52985
ENSG00000111145	ELK3	C	-2.49987	-0.170709	1.27126	1.39933
ENSG00000066322	ELOVL1 ENSG00000066322	C	-2.65767	1.27169	0.846907	0.539075
ENSG00000106367	AP1S1 ENSG00000106367	C	-2.53873	0.00931733	1.35937	1.17004
ENSG00000100979	PLTP	C	-2.60043	1.51416	0.57687	0.509405
ENSG00000284142	MIR6845	C	-2.24589	2.11119	0.321142	-0.186434
ENSG00000077150	NFKB2	C	-2.5602	0.171747	1.45497	0.933489
ENSG00000187653	TMSB4XP8	C	-2.54804	0.927734	0.137244	1.48307
ENSG00000213977	TAX1BP3	C	-2.67275	0.779714	0.871279	1.02176
ENSG00000111229	ARPC3 ENSG00000111229	C	-2.60328	0.316226	1.21826	1.06879
ENSG00000129226	CD68	C	-2.557	0.75406	1.51435	0.288588
ENSG00000239672	NME1	C	-2.63032	0.832801	1.25029	0.547222
ENSG00000283936	MIR3658	C	-2.5031	0.0324776	1.44666	1.02396
ENSG00000011304	PTBP1	C	-2.60977	0.477142	0.962513	1.17011
ENSG00000105655	ISYNA1	C	-2.18077	2.12955	0.116158	-0.0649444
ENSG00000197903	H2BC12	C	-2.2596	2.01038	-0.055816	0.305043
ENSG00000179820	MYADM	C	-2.52584	1.46638	0.517189	0.542269
ENSG00000155366	RHOC	C	-2.57032	0.518102	1.22591	0.826306
ENSG00000105329	TGFB1	C	-2.43195	1.66275	0.558287	0.210916
ENSG00000134531	EMP1	C	-2.53762	0.320178	1.00672	1.21072
ENSG00000116285	ERRFI1	C	-2.53582	1.33659	0.664815	0.534406
ENSG00000244509	APOBEC3C	C	-2.39568	1.70662	0.206262	0.482795
ENSG00000130313	PGLS	C	-2.56071	1.17268	0.737267	0.65076
ENSG00000169715	MT1E	C	-2.21618	1.39735	1.31942	-0.500589
ENSG00000172965	MIR4435-2HG	C	-2.25752	1.9079	0.213142	0.136481
ENSG00000050344	NFE2L3	C	-2.48725	0.556164	0.517	1.41408
ENSG00000112096	SOD2	C	-0.34194	0.269126	2.10396	-2.03115
ENSG00000283842	MIR4751	C	-2.48429	0.296544	1.27747	0.910272
ENSG00000169230	PRELID1	C	-2.49296	0.329652	1.23539	0.927919
ENSG00000151239	TWF1	C	-2.4213	0.0406905	1.15322	1.2274
ENSG00000207870	MIR221	C	-2.38172	-0.0523681	1.24983	1.18425
ENSG00000155660	PDIA4 ENSG00000155660	C	-2.45973	0.25597	0.943259	1.2605
ENSG00000099812	MISP	C	-2.3747	0.0688314	0.775336	1.53053
ENSG00000092841	MYL6	C	-2.33405	-0.137817	1.41321	1.05865
SNORD80	NA	C	-2.36441	0.0280741	1.51787	0.818467
ENSG00000283969	MIR6838	C	-2.51412	1.07029	0.571195	0.872639
ENSG00000132561	MATN2	C	-2.15901	1.59712	-0.482471	1.04435
ENSG00000197956	S100A6	C	-2.50385	0.976947	0.970377	0.556524
ENSG00000166130	IKBIP	C	-2.41838	0.14216	1.13036	1.14585
ENSG00000103202	NME4	C	-2.49625	0.665809	1.05329	0.777158
ENSG00000091136	LAMB1	C	-1.89061	0.0149003	-0.290658	2.16637
ENSG00000177410	ZFAS1	C	-2.47644	0.585106	1.14334	0.747994
ENSG00000207165	SNORA70	C	-2.47179	0.487859	1.08524	0.898692
ENSG00000131236	CAP1 ENSG00000131236	C	-2.46896	0.539385	0.776534	1.15304
ENSG00000167460	TPM4	C	-2.49414	0.852223	0.787512	0.854405
ENSG00000140575	IQGAP1	C	-2.20983	1.80741	0.038029	0.364386
ENSG00000117399	CDC20 ENSG00000117399	C	-2.3883	0.163345	1.28724	0.937724
ENSG00000136156	ITM2B	C	-2.15528	1.85385	-0.104788	0.406222
ENSG00000147140	NONO	C	-2.30678	-0.0324805	0.861262	1.478
ENSG00000161960	EIF4A1	C	-2.3254	-0.0107905	1.38632	0.949868
ENSG00000075618	FSCN1	C	-2.47094	0.975696	0.86414	0.631101
ENSG00000284012	MIR6840	C	-2.46159	1.06946	0.603418	0.788715
ENSG00000006327	TNFRSF12A	C	-2.28902	-0.121829	1.1964	1.21444
ENSG00000277512	SNORD65	C	-2.41128	0.449393	1.31117	0.65071
ENSG00000129103	SUMF2	C	-2.45199	0.608314	0.848588	0.995086
ENSG00000283836	MIR6734	C	-1.88625	1.87676	-0.706563	0.716056
ENSG00000134574	DDB2	C	-2.39907	1.18193	0.887092	0.330049
ENSG00000163565	IFI16	C	-2.36927	0.191685	1.10967	1.06792
ENSG00000103018	CYB5B	C	-2.32623	1.45194	0.20266	0.671638
ENSG00000284541	MIR4517	C	-2.37973	1.19987	0.91262	0.267242
ENSG00000239264	TXNDC5	C	-2.36734	0.205876	1.07656	1.08491
ENSG00000130508	PXDN	C	-2.36422	1.34611	0.663407	0.354703
ENSG00000078369	GNB1	C	-2.29056	-0.0392869	1.19321	1.13664
ENSG00000179218	CALR	C	-2.4332	0.743411	0.781945	0.907846
ENSG00000014914	MTMR11	C	-2.34617	1.33865	0.533703	0.473824
ENSG00000284152	MIR6758	C	-2.04663	1.60729	0.899483	-0.460147
ENSG00000172725	CORO1B	C	-2.30247	0.0845285	1.0651	1.15284
ENSG00000100906	NFKBIA	C	-2.04579	-0.113393	1.85074	0.308437
ENSG00000110092	CCND1 ENSG00000110092	C	-2.36892	0.741044	0.529503	1.09837
ENSG00000123975	CKS2	C	-2.35669	0.569671	1.17921	0.607804
ENSG00000101187	SLCO4A1	C	-2.19274	1.60925	0.470738	0.112754
ENSG00000142192	APP	C	-2.35026	1.11083	0.438224	0.801203
ENSG00000113583	C5orf15	C	-2.18772	-0.0781512	0.850186	1.41569
ENSG00000167900	TK1	C	-2.21456	-0.0699001	1.13981	1.14465
ENSG00000101224	CDC25B	C	-1.91154	1.96087	-0.0143656	-0.0349642
ENSG00000259040	BLOC1S5-TXNDC5	C	-2.28405	0.174375	1.04314	1.06654
ENSG00000185222	TCEAL9	C	-2.19649	0.0156667	0.818352	1.36248
ENSG00000284251	MIR711	C	-2.24991	1.2764	0.714804	0.258705
ENSG00000132481	TRIM47	C	-1.88776	1.90847	-0.161034	0.140317
ENSG00000147010	SH3KBP1	C	-2.24767	0.239419	0.844852	1.1634
ENSG00000170540	ARL6IP1	C	-2.2999	0.511477	0.81569	0.972731
ENSG00000106245	BUD31	C	-2.1485	-0.0757306	1.26881	0.955419
ENSG00000284482	MIR4680	C	-2.21211	1.36219	0.321156	0.528761
ENSG00000111321	LTBR	C	-2.21546	0.117519	1.09751	1.00044
ENSG00000155254	MARVELD1	C	-2.20093	0.136173	0.797774	1.26699
ENSG00000138448	ITGAV	C	-2.15839	1.32146	0.0571323	0.779801
ENSG00000100504	PYGL	C	-1.87979	1.80098	0.363051	-0.284237
ENSG00000128394	APOBEC3F	C	-2.03604	1.65072	0.100239	0.285081
ENSG00000167004	PDIA3	C	-2.2251	0.316563	0.771913	1.13663
ENSG00000284368	MIR5047	C	-2.24834	0.787675	1.02504	0.435619
ENSG00000033170	FUT8	C	-2.27196	0.709266	0.677231	0.885466
ENSG00000162627	SNX7	C	-2.17786	1.18158	0.138463	0.857816
ENSG00000284595	MIR6785	C	-1.72071	1.49143	-0.801289	1.03057
ENSG00000120254	MTHFD1L	C	-2.14578	0.0119557	1.05245	1.08137
ENSG00000283844	MIR214	C	-2.01157	0.125612	1.6643	0.221662
ENSG00000283829	MIR378I	C	-2.183	0.392395	0.48333	1.30728
ENSG00000242372	EIF6	C	-2.16289	0.0850201	1.1221	0.955775
ENSG00000161888	SPC24	C	-1.81432	1.88437	-0.068835	-0.00121488
ENSG00000167397	VKORC1	C	-2.22939	0.749549	1.06351	0.41633
ENSG00000277957	SENP3-EIF4A1	C	-2.09548	-0.0621346	1.28765	0.869967
ENSG00000200530	SNORD35B	C	-2.24444	0.930187	0.803246	0.511011
ENSG00000284386	MIR147B	D	-5.85158	-2.19919	4.75708	3.29368
ENSG00000137673	MMP7	D	-3.42102	-3.26556	3.46053	3.22605
ENSG00000196611	MMP1	D	-3.40452	-3.26098	3.50847	3.15702
ENSG00000115009	CCL20	D	-3.20459	-3.00221	4.27753	1.92928
ENSG00000283876	MIR4260	D	-3.06866	-3.3053	3.69917	2.67479
ENSG00000149948	HMGA2	D	-3.16577	-3.06691	3.39658	2.8361
ENSG00000171345	KRT19	D	-3.2531	-2.87812	3.00214	3.12909
ENSG00000163739	CXCL1	D	-3.00258	-3.00474	3.88367	2.12365
ENSG00000105825	TFPI2	D	-2.97821	-3.13754	3.21744	2.89831
ENSG00000162366	PDZK1IP1	D	-3.07039	-2.90136	3.38909	2.58267
ENSG00000124875	CXCL6	D	-2.7551	-2.73354	3.90968	1.57896
ENSG00000103485	QPRT	D	-3.00038	-2.68028	2.97271	2.70795
RPL31P38	NA	D	-2.58233	-2.58233	4.22889	0.93576
ENSG00000283759	MIR614	D	-3.4973	-1.90615	2.47659	2.92687
ENSG00000166920	C15orf48	D	-3.06132	-2.37279	3.34535	2.08876
ENSG00000026508	CD44	D	-3.47192	-1.94797	2.69585	2.72405
ENSG00000137731	FXYD2	D	-2.82413	-2.59915	2.77075	2.65254
ENSG00000163347	CLDN1	D	-2.89193	-2.37203	2.28824	2.97572
ENSG00000235162	C12orf75	D	-2.24188	-2.8814	2.55537	2.56792
ENSG00000115008	IL1A	D	-2.56302	-2.51922	2.93727	2.14497
ENSG00000119888	EPCAM	D	-2.59492	-2.38182	1.94361	3.03314
ENSG00000105976	MET	D	-2.02397	-2.96693	2.44339	2.5475
ENSG00000173267	SNCG	D	-2.47125	-2.47497	2.20778	2.73844
ENSG00000167642	SPINT2	D	-2.72738	-2.17607	2.12679	2.77666
ENSG00000284485	MIR205	D	-2.41597	-2.41597	1.7488	3.08314
ENSG00000123416	TUBA1B	D	-3.79663	-0.499605	2.14305	2.15318
ENSG00000125730	C3	D	-3.29423	-1.26799	2.29913	2.2631
ENSG00000228169	PPIAP19	D	-2.20691	-2.12149	3.57134	0.757067
ENSG00000196878	LAMB3	D	-2.26133	-2.39957	2.85769	1.80321
ENSG00000285146	MIR7703	D	-2.52819	-1.0317	3.82082	-0.260933
ENSG00000253368	TRNP1	D	-2.27183	-2.37823	2.09294	2.55712
ENSG00000167553	TUBA1C	D	-3.69659	-0.283312	2.05722	1.92268
ENSG00000123496	IL13RA2	D	-2.35753	-2.17612	1.61038	2.92328
ENSG00000261040	WFDC21P	D	-2.12317	-2.02211	3.47516	0.67013
ENSG00000227376	FTH1P16	D	-1.97933	-1.9327	3.62217	0.289859
ENSG00000169429	CXCL8	D	-2.49743	-1.61562	3.34807	0.764973
ENSG00000148346	LCN2	D	-1.56788	-1.54766	3.88051	-0.764975
ENSG00000196136	SERPINA3	D	-2.06693	-2.34619	2.89122	1.52189
ENSG00000197261	C6orf141	D	-2.23249	-2.2526	2.5288	1.95629
ENSG00000165474	GJB2	D	-2.948	-1.03504	3.11742	0.865612
ENSG00000166523	CLEC4E	D	-2.11586	-1.99666	3.32053	0.791994
ENSG00000133101	CCNA1	D	-2.27394	-2.19411	1.97979	2.48827
ENSG00000255245	FXYD6-FXYD2	D	-2.30822	-2.1685	2.29465	2.18207
ENSG00000263961	RHEX	D	-2.22109	-2.20729	1.84111	2.58727
ENSG00000125618	PAX8	D	-2.22099	-2.21254	2.3488	2.08473
ENSG00000160678	S100A1	D	1.56584	-3.82339	0.948588	1.30897
ENSG00000137309	HMGA1	D	-1.43537	-2.83624	2.1662	2.10541
ENSG00000166670	MMP10	D	-2.10223	-2.10253	2.8999	1.30487
ENSG00000168743	NPNT	D	-2.0463	-2.12662	1.22881	2.94411
ENSG00000149557	FEZ1	D	-2.2858	-2.01743	2.4245	1.87873
ENSG00000057019	DCBLD2	D	-2.27389	-2.01708	1.98895	2.30202
SNORA104	NA	D	-2.75741	-1.41762	1.97546	2.19956
ENSG00000102172	SMS	D	-2.12459	-2.10409	2.22167	2.00701
ENSG00000222750	RNU4-46P	D	-2.16932	-2.05551	2.15145	2.07338
ENSG00000166598	HSP90B1	D	-3.07985	-0.800404	1.79409	2.08616
ENSG00000189143	CLDN4	D	-2.12247	-2.06135	1.85489	2.32893
ENSG00000230076	RPL10P6	D	-2.14935	-2.01335	2.14664	2.01607
ENSG00000188313	PLSCR1	D	-2.37924	-1.73695	1.75756	2.35863
ENSG00000165376	CLDN2	D	-2.08169	-2.05901	1.83276	2.30794
ENSG00000278229	RPS17	D	-2.22407	-0.326218	3.37864	-0.828348
ENSG00000166681	BEX3	D	-2.54973	-1.46773	1.60682	2.41064
ENSG00000176890	TYMS	D	-3.17557	-0.468817	1.85524	1.78914
ENSG00000058085	LAMC2	D	-3.20768	-0.29181	1.63453	1.86496
ENSG00000139211	AMIGO2	D	-2.10246	-1.9269	1.69204	2.33732
ENSG00000168679	SLC16A4	D	-2.05062	-1.94492	1.54402	2.45153
ENSG00000282838	PRSS21	D	-2.02213	-2.02213	2.0019	2.04237
ENSG00000135373	EHF	D	-1.97478	-1.97171	1.49728	2.44922
ENSG00000284353	MIR142	D	-2.24995	-1.21939	3.04561	0.423724
ENSG00000123610	TNFAIP6	D	-2.60121	-1.20115	2.10682	1.69554
ENSG00000155465	SLC7A7	D	-2.42763	-1.42148	2.07727	1.77184
ENSG00000166394	CYB5R2	D	-2.08089	-1.69242	2.57607	1.19724
ENSG00000125538	IL1B	D	-2.21248	-1.38305	2.75551	0.84002
ENSG00000167552	TUBA1A	D	-2.92222	-0.595463	1.77212	1.74557
ENSG00000103044	HAS3	D	-1.98941	-1.84556	2.26475	1.57022
ENSG00000100558	PLEK2	D	-2.14464	-1.64579	2.29402	1.49641
ENSG00000047457	CP	D	-1.88954	-1.88754	2.39879	1.37829
ENSG00000143753	DEGS1	D	-2.60959	-1.01585	1.41648	2.20895
ENSG00000188643	S100A16	D	-2.10981	-1.68989	2.1924	1.60731
ENSG00000006118	TMEM132A	D	-2.05541	-1.56719	2.65672	0.965876
ENSG00000284503	MIR3652	D	-2.47455	-1.24372	1.72638	1.99189
ENSG00000198976	MIR429	D	-1.90355	-1.90355	1.68872	2.11837
ENSG00000165215	CLDN3	D	-1.87824	-1.86519	1.36181	2.38163
ENSG00000233913	RPL10P9	D	-2.13005	-1.65802	1.93363	1.85444
ENSG00000105971	CAV2	D	-2.94954	-0.328335	1.30191	1.97596
ENSG00000170545	SMAGP	D	-1.91308	-1.86448	1.76679	2.01078
ENSG00000164687	FABP5	D	-1.43592	-2.28077	1.65451	2.06218
ENSG00000105854	PON2	D	-2.78652	-0.549106	1.60432	1.7313
ENSG00000125726	CD70	D	-2.20265	-1.41674	1.48168	2.13771
ENSG00000158710	TAGLN2	D	-2.83094	-0.437858	1.79233	1.47647
ENSG00000112299	1	D	-1.92588	-1.72024	1.98019	1.66593
ENSG00000145247	OCIAD2	D	-2.88475	-0.228234	1.80975	1.30323
SNORD29	NA	D	-2.81284	-0.391268	1.79849	1.40561
ENSG00000135269	TES	D	-2.17249	-1.39075	1.44833	2.1149
ENSG00000158769	F11R ENSG00000158769	D	-1.87574	-1.75569	1.77403	1.8574
ENSG00000283904	MIR155	D	-2.2301	-1.25592	1.24747	2.23855
ENSG00000115828	QPCT	D	-2.1135	-1.42447	2.17269	1.36528
ENSG00000217555	CKLF	D	-2.82096	-0.272326	1.63869	1.45459
ENSG00000139117	CPNE8	D	-2.19772	-1.29488	1.45606	2.03654
ENSG00000105246	EBI3	D	-1.93144	-1.60966	2.06423	1.47687
ENSG00000214199	EEF1A1P12	D	-1.62156	-1.50814	2.77585	0.353846
ENSG00000111674	ENO2	D	-2.51638	-0.560102	2.35521	0.721268
ENSG00000111716	LDHB	D	-1.52059	-2.01341	1.89538	1.63862
ENSG00000163898	LIPH	D	-1.71795	-1.72345	1.16969	2.27171
ENSG00000152128	TMEM163	D	-1.85403	-1.64784	2.01165	1.49022
ENSG00000265465	MIR4768	D	-1.74697	-1.74697	1.48927	2.00466
ENSG00000184012	TMPRSS2	D	-1.73358	-1.72844	2.10114	1.36088
ENSG00000266017	MIR4477B	D	-2.02962	-1.41977	1.4571	1.99229
ENSG00000091129	NRCAM	D	-1.77786	-1.70081	1.64998	1.82868
ENSG00000097021	ACOT7	D	-2.62162	-0.495132	1.73801	1.37874
MIR10392	NA	D	-0.527521	-2.60092	1.68287	1.44557
ENSG00000254788	CKLF-CMTM1	D	-2.6772	-0.343226	1.59894	1.42149
ENSG00000169129	AFAP1L2	D	-1.81266	-1.62492	1.75793	1.67964
ENSG00000176907	TCIM	D	-1.89909	-1.41821	2.2385	1.0788
ENSG00000081041	CXCL2	D	-0.363336	-2.41132	2.37969	0.394965
ENSG00000139289	PHLDA1	D	-2.19127	-1.13582	1.85837	1.46871
ENSG00000234685	NUS1P2	D	-1.70622	-1.70647	1.55075	1.86194
ENSG00000166825	ANPEP	D	-2.09321	-0.940571	2.46021	0.573562
ENSG00000111786	SRSF9	D	-2.58718	-0.455518	1.744	1.2987
ENSG00000124145	SDC4	D	-1.31483	-2.04843	1.55298	1.81028
ENSG00000150551	LYPD1	D	-1.72368	-1.6608	1.64839	1.73608
ENSG00000113657	DPYSL3	D	-2.34387	-0.87245	1.51325	1.70307
ENSG00000150782	IL18 ENSG00000150782	D	-1.77832	-1.59779	1.80845	1.56766
ENSG00000171729	TMEM51	D	-2.25263	-0.997205	1.48944	1.76039
ENSG00000135446	CDK4	D	-2.55305	-0.472054	1.56271	1.46239
ENSG00000163734	CXCL3	D	-1.33932	-1.40099	2.75035	-0.0100372
ENSG00000171951	SCG2	D	-1.79091	-1.55253	1.49222	1.85122
ENSG00000213235	EEF1A1P16	D	-1.44314	-1.41282	2.66502	0.190943
ENSG00000137880	GCHFR	D	-1.97159	-1.33309	1.71149	1.5932
ENSG00000131910	NR0B2	D	-1.63065	-1.6885	1.42561	1.89354
ENSG00000283818	MIR7844	D	0.55288	-2.75512	1.73023	0.47201
LOC100132644	NA	D	-1.63504	-1.65444	1.27161	2.01787
ENSG00000127920	GNG11	D	-1.62133	-1.70335	1.71566	1.60902
ENSG00000163082	SGPP2	D	-1.64434	-1.63393	2.02237	1.25589
ENSG00000173207	CKS1B	D	-2.58712	-0.303666	1.5293	1.36149
ENSG00000134824	FADS2	D	-1.87711	-1.39258	1.36746	1.90223
ENSG00000164251	F2RL1	D	-2.13564	-1.03954	1.86843	1.30675
ENSG00000283391	EEF1B2	D	-1.5355	-0.809475	2.75713	-0.412159
ENSG00000213772	EIF1P7	D	-1.24625	-1.27387	2.73378	-0.213658
ENSG00000101000	PROCR	D	-2.02887	-1.07897	1.05024	2.0576
ENSG00000166145	SPINT1	D	-1.7873	-1.45035	1.72345	1.5142
ENSG00000258947	TUBB3	D	-2.36424	-0.647757	1.5678	1.44419
ENSG00000120889	TNFRSF10B	D	-2.44349	-0.491072	1.56285	1.37171
ENSG00000018408	WWTR1	D	-1.83644	-1.34322	1.22443	1.95523
ENSG00000175130	MARCKSL1	D	-2.20232	-0.824686	1.93481	1.0922
ENSG00000019991	HGF	D	-1.70988	-1.52131	1.57818	1.65301
ENSG00000142634	EFHD2	D	-2.48388	-0.37844	1.58965	1.27267
ENSG00000104312	RIPK2	D	-1.95086	-1.21169	1.83705	1.3255
ENSG00000166508	MCM7	D	-2.24911	-0.788725	1.51327	1.52457
ENSG00000185834	RPL12P4 ENSG00000185834	D	-1.76029	-0.865885	2.53139	0.094782
ENSG00000086300	SNX10	D	-2.14793	-0.869231	1.82036	1.1968
ENSG00000136883	KIF12	D	-1.53439	-1.47197	0.849449	2.15692
KCCAT198	NA	D	-1.54203	-1.54203	1.94708	1.13698
ENSG00000142949	PTPRF	D	-2.29468	-0.596494	1.48219	1.40899
ENSG00000196924	FLNA	D	-2.38993	-0.320183	0.978705	1.73141
ENSG00000171314	PGAM1 ENSG00000171314	D	-2.40809	-0.340591	1.55708	1.19159
ENSG00000075223	SEMA3C	D	-1.97596	-1.05352	1.25837	1.77111
ENSG00000141934	PLPP2	D	-2.06176	-0.944977	1.32366	1.68308
ENSG00000100644	HIF1A	D	-2.05925	-0.943453	1.41029	1.59241
ENSG00000101017	CD40	D	-1.90831	-1.10088	1.86432	1.14488
ENSG00000101856	PGRMC1	D	-2.09877	-0.812463	1.0723	1.83894
ENSG00000135862	LAMC1	D	-2.23506	-0.625292	1.20837	1.65198
ENSG00000198648	STK39	D	-1.89643	-1.14812	1.42928	1.61527
ENSG00000134287	ARF3	D	-2.35327	-0.39683	1.20464	1.54546
ENSG00000166803	PCLAF	D	-2.26311	-0.561431	1.61829	1.20625
ENSG00000170312	CDK1	D	-2.18527	-0.708528	1.36684	1.52696
ENSG00000111319	SCNN1A	D	-1.59422	-1.44469	1.18451	1.8544
ENSG00000124225	PMEPA1	D	-1.90533	-1.11571	1.49499	1.52605
ENSG00000111371	SLC38A1	D	-0.768796	-2.12808	1.5771	1.31977
ENSG00000106258	CYP3A5	D	-1.46906	-1.45938	2.06698	0.861459
ENSG00000284143	MIR4700	D	-2.16261	-0.704591	1.49371	1.37349
ENSG00000130303	BST2	D	-1.42447	-1.61306	1.41669	1.62084
RPL21P20	NA	D	-1.24801	-1.24801	2.47801	0.0180124
ENSG00000175592	FOSL1	D	-2.06274	-0.849775	1.54698	1.36553
ENSG00000206053	JPT2	D	-2.09423	-0.799051	1.45962	1.43366
ENSG00000255717	SNHG1	D	-2.27693	-0.422431	1.64437	1.055
ENSG00000131016	AKAP12	D	-1.63984	-1.36503	1.60109	1.40378
ENSG00000120885	CLU	D	-1.59988	-1.4104	1.48852	1.52176
ENSG00000167797	CDK2AP2	D	-2.30721	-0.350183	1.49922	1.15817
ENSG00000134057	CCNB1	D	-2.18996	-0.584897	1.38751	1.38735
ENSG00000154269	ENPP3 ENSG00000154269	D	-1.44443	-1.43299	2.0201	0.857315
ENSG00000070882	OSBPL3	D	-1.63305	-1.34089	1.46306	1.51088
ENSG00000059758	CDK17	D	-1.86443	-1.0599	1.39573	1.52861
ENSG00000146038	DCDC2	D	-1.474	-1.45279	1.08116	1.84563
ENSG00000099282	TSPAN15	D	-1.28779	-1.64471	1.15401	1.77849
ENSG00000169756	LIMS1 ENSG00000169756	D	-1.88532	-1.02568	1.41267	1.49833
ENSG00000196754	S100A2	D	-1.50977	-1.43847	1.72948	1.21877
ENSG00000197142	ACSL5	D	-1.52057	-1.41971	1.74667	1.1936
ENSG00000117472	TSPAN1	D	-1.42584	-1.45742	0.958245	1.92501
ENSG00000003436	TFPI	D	-1.42075	-1.53602	1.51389	1.44288
RPL19P6	NA	D	-1.25623	-1.00291	2.46975	-0.210614
ENSG00000277194	SNORD22	D	-2.25587	-0.380118	1.34923	1.28676
ENSG00000107679	PLEKHA1	D	-1.57966	-1.30208	1.01614	1.8656
ENSG00000132341	RAN	D	-1.81945	-1.05625	1.70043	1.17528
ENSG00000185101	ANO9	D	-1.58511	-1.24347	0.849685	1.9789
ENSG00000207547	MIR25	D	-2.3044	-0.212524	1.05595	1.46097
ENSG00000103316	CRYM	D	-1.09899	-0.9499	2.49613	-0.447234
ENSG00000090776	EFNB1	D	-1.95401	-0.817527	1.07768	1.69386
ENSG00000283881	MIR3916	D	-1.80376	-0.885129	1.99936	0.68953
ENSG00000112378	PERP	D	-1.57878	-1.29551	1.14424	1.73004
ENSG00000125657	TNFSF9	D	-2.11458	-0.585348	1.35003	1.34989
ENSG00000276404	MIR6835	D	-1.5943	-1.19303	0.859714	1.92762
ENSG00000115091	ACTR3	D	-2.22214	-0.351909	1.31607	1.25798
ENSG00000134291	TMEM106C	D	-2.07472	-0.616336	1.39157	1.29948
ENSG00000067057	PFKP	D	-2.20396	-0.367951	1.27011	1.3018
ENSG00000141380	SS18	D	-1.97365	-0.774874	1.41746	1.33106
ENSG00000226415	TPI1P1	D	-1.03849	-1.64512	2.00677	0.676847
ENSG00000139725	RHOF	D	-2.03741	-0.528295	1.80278	0.762927
LINC01510	NA	D	-1.43654	-1.43654	1.48731	1.38578
ENSG00000178999	AURKB	D	-2.25019	-0.212323	1.45176	1.01075
ENSG00000166851	PLK1	D	-1.99742	-0.72387	1.33286	1.38844
ENSG00000163931	TKT	D	-2.19592	-0.344916	1.16963	1.37121
ENSG00000120068	HOXB8	D	-1.52824	-1.30937	1.18822	1.64938
ENSG00000079819	EPB41L2	D	-1.71871	-1.07954	1.14486	1.65338
ENSG00000242735	RPSAP26	D	-1.31249	-0.930205	2.35758	-0.114889
ENSG00000166226	CCT2	D	-1.72977	-1.08097	1.37337	1.43738
LOC105372233	NA	D	-2.12312	-0.40458	0.957286	1.57041
ENSG00000089820	ARHGAP4	D	-2.12209	-0.448163	1.14491	1.42534
ENSG00000111206	FOXM1	D	-1.98746	-0.698301	1.33479	1.35098
ENSG00000117394	SLC2A1	D	-1.89096	-0.828799	1.55551	1.16425
ENSG00000115419	GLS	D	-1.87187	-0.822822	1.01785	1.67685
ENSG00000284331	MIR4741	D	-1.75075	-1.02661	1.27744	1.49992
ENSG00000029153	ARNTL2	D	-1.90856	-0.807724	1.31662	1.39967
ENSG00000064115	TM7SF3	D	-2.22448	-0.202142	1.35001	1.07662
ENSG00000172183	ISG20	D	-1.65869	-1.11904	1.60558	1.17215
ENSG00000103534	TMC5	D	-1.41209	-1.40755	1.44954	1.3701
ENSG00000174939	ASPHD1 ENSG00000174939	D	-1.68686	-1.08693	1.21102	1.56278
ENSG00000100162	CENPM	D	-2.05756	-0.537906	1.20047	1.39499
ENSG00000125398	SOX9	D	-1.35471	-1.42868	1.15714	1.62626
ENSG00000185215	TNFAIP2	D	-1.86638	-0.691299	1.8377	0.719981
ENSG00000163362	INAVA	D	-1.40364	-1.39299	1.28009	1.51655
ENSG00000005448	WDR54	D	-1.80964	-0.866997	1.67949	0.997151
ENSG00000283926	MIR192	D	-1.39229	-1.39229	1.57242	1.21217
ENSG00000196139	AKR1C3	D	0.337509	-2.31661	0.555656	1.42344
LOC388734	NA	D	-1.20211	-1.02136	2.30396	-0.0804955
ENSG00000241685	ARPC1A	D	-2.20063	-0.211748	1.17684	1.23554
ENSG00000160867	FGFR4	D	-1.25305	-1.51785	1.18623	1.58467
RNA28SN3	NA	D	-0.707783	-0.781508	2.40772	-0.918426
ENSG00000110888	CAPRIN2	D	-2.13146	-0.321609	1.43585	1.01722
ENSG00000131981	LGALS3	D	-1.8575	-0.804249	1.12307	1.53868
ENSG00000166532	RIMKLB	D	-2.06425	-0.300018	1.71683	0.647436
ENSG00000215845	TSTD1	D	-0.950929	-1.76117	1.24396	1.46814
ENSG00000164400	CSF2	D	-1.05537	-1.05537	2.32078	-0.210042
SNORD44	NA	D	-2.16226	-0.170621	1.49487	0.83801
ENSG00000005884	ITGA3	D	-1.30707	-1.45105	1.42738	1.33075
ENSG00000136231	IGF2BP3	D	-1.36744	-1.37973	1.19262	1.55456
ENSG00000107833	NPM3	D	-1.78419	-0.894292	1.47044	1.20805
ENSG00000280831	RPS25	D	-0.860839	-0.760153	2.37066	-0.749665
ENSG00000101197	BIRC7	D	-0.941708	-0.818305	-0.601386	2.3614
ENSG00000130775	THEMIS2	D	-2.06988	-0.383343	1.14382	1.3094
ENSG00000084207	GSTP1	D	-1.38599	-1.33264	1.44568	1.27296
ENSG00000233045	RPL15P5	D	-1.06957	-0.94676	2.29165	-0.275322
ENSG00000145632	PLK2	D	-1.72981	-0.754426	0.645276	1.83896
ENSG00000281221	PSMC4	D	-1.00296	-0.808665	2.32621	-0.51458
ENSG00000169436	COL22A1	D	-1.33819	-1.3619	1.24264	1.45745
ENSG00000254893	RAP1BL	D	-1.27954	-1.04646	2.13096	0.195039
ENSG00000230593	PPIAP40	D	-1.14997	-1.13496	2.16175	0.123173
ENSG00000122952	ZWINT	D	-2.07365	-0.327077	1.16697	1.23375
ENSG00000186007	LEMD1	D	-1.34246	-1.34246	1.1669	1.51802
ENSG00000136205	TNS3	D	-1.86221	-0.657968	1.05163	1.46855
ENSG00000171208	NETO2	D	-1.40612	-1.25871	1.17705	1.48778
ENSG00000101255	TRIB3	D	-1.48316	-1.17212	1.4885	1.16678
ENSG00000258586	LINC02274	D	-1.33176	-1.33176	1.17605	1.48747
ENSG00000073792	IGF2BP2	D	-1.39656	-1.27336	1.37882	1.2911
ENSG00000213763	ACTBP2	D	-1.22887	-1.14042	2.05422	0.315068
RNA18SN2	NA	D	-0.414294	-1.96406	1.55352	0.824832
ENSG00000076944	STXBP2	D	-1.81161	-0.700532	0.944675	1.56747
ENSG00000137767	SQOR	D	-1.11663	-1.50627	1.59766	1.02524
ENSG00000073756	PTGS2	D	-0.900845	-0.419537	2.28108	-0.960695
ENSG00000112303	2	D	-1.38146	-1.25639	1.56167	1.07618
ENSG00000140379	BCL2A1	D	-1.54408	-0.825444	1.96197	0.407549
ENSG00000139343	SNRPF	D	-1.8957	-0.577917	1.44126	1.03236
ENSG00000120802	TMPO	D	-1.73639	-0.829367	1.10712	1.45864
ENSG00000101457	DNTTIP1	D	-1.48157	-1.11982	1.62196	0.979428
ENSG00000066117	SMARCD1	D	-1.95907	-0.473768	1.17968	1.25316
ENSG00000167747	C19orf48	D	-2.01585	-0.3187	1.42398	0.910573
ENSG00000123352	SPATS2	D	-1.52862	-1.09015	1.16996	1.44881
ENSG00000115641	FHL2	D	-0.501578	-1.93821	1.28076	1.15903
ENSG00000113368	LMNB1	D	-1.88294	-0.588817	1.18915	1.2826
ENSG00000082512	TRAF5	D	-1.82971	-0.657535	1.04975	1.4375
ENSG00000115758	ODC1	D	-1.09108	-1.45617	1.70358	0.843664
ENSG00000158089	GALNT14	D	-1.6104	-0.972193	1.16783	1.41476
ENSG00000170412	GPRC5C ENSG00000170412	D	-0.305142	-2.00702	0.955856	1.35631
ENSG00000146733	PSPH	D	-1.72015	-0.803449	1.05967	1.46392
ENSG00000069482	GAL	D	-0.957532	-0.935409	2.22789	-0.334945
ENSG00000013588	GPRC5A	D	-1.4432	-1.16808	1.37446	1.23682
ENSG00000197965	MPZL1	D	-2.00236	-0.331861	1.2444	1.08983
ENSG00000131473	ACLY	D	-2.05781	-0.204796	1.03932	1.22328
ENSG00000128791	TWSG1	D	-1.9969	-0.236216	0.719844	1.51327
ENSG00000234964	FABP5P7	D	-1.19854	-1.39678	1.08619	1.50913
ENSG00000085514	PILRA	D	-1.67182	-0.756969	1.70586	0.722926
