# Supplementary material for: Establishment of Organoids From Human Epithelioid Sarcoma With the Air-Liquid Interface Organoid Cultures
Source: Front Oncol. 2022 May 23;12:893592. doi: 10.3389/fonc.2022.893592 (PMC9169059; doi:10.3389/fonc.2022.893592)
Supplement: Supplementary file 15 [file Table_8.xlsx]

## Sheet: Sheet1
Table S8 Customly defined signature of 84 genes associated to autophagy, according to Orlotti et al. [37].
AUTOPHAGY
Gene Symbol	Gene Name	Normal	EPS Tissue	ODX1	ODX2
AKT1	AKT serine/threonine kinase 1	2.08	2.8	3.74	3.89
AMBRA1	autophagy and beclin 1 regulator 1	0.61	1.3	1.55	1.35
APP	amyloid beta precursor protein	2.5	5.96	5.29	5.65
ATG10	autophagy related 10	0.49	1.01	1.04	1.12
ATG12	autophagy related 12	0.88	1.8	1.83	1.81
ATG16L1	autophagy related 16 like 1	0.3	2.46	1.31	1.26
ATG16L2	autophagy related 16 like 2	0.07	0.05	0.15	0.32
ATG3	autophagy related 3	1.56	2.94	3.03	2.86
ATG4A	autophagy related 4A cysteine peptidase	1.2	1.09	0.99	1.01
ATG4B	autophagy related 4B cysteine peptidase	1.45	3.07	2.84	2.86
ATG4C	autophagy related 4C cysteine peptidase	0.46	1.33	0.77	0.73
ATG4D	autophagy related 4D cysteine peptidase	2.49	1.95	1.6	1.32
ATG5	autophagy related 5	1.38	2	2.22	2.14
ATG7	autophagy related 7	0.71	1.34	2.52	2.15
ATG9A	autophagy related 9A	2.96	2.06	2.26	1.91
ATG9B	autophagy related 9B	0	0.17	0.02	0.02
BAD	BCL2 associated agonist of cell death	1.73	2.48	3.5	3.53
BAK1	BCL2 antagonist/killer 1	1.07	1.31	1.85	1.85
BAX	BCL2 associated X, apoptosis regulator	1.5	5.14	5.59	5.18
BCL2	BCL2, apoptosis regulator	1.71	0.22	0.03	0.01
BCL2L1	BCL2 like 1	1.53	5.11	3.31	3.72
BECN1	beclin 1	2.71	3.64	3.3	3.12
BID	BH3 interacting domain death agonist	0.19	1.46	1.55	1.46
BNIP3	BCL2 interacting protein 3	4.57	2.08	5.16	4.23
CASP3	caspase 3	0.91	1.82	2.08	2.05
CASP8	caspase 8	0.17	1.97	3.23	3.15
CDKN1B	cyclin dependent kinase inhibitor 1B	2.54	2.3	2.75	3.91
CDKN2A	cyclin dependent kinase inhibitor 2A	0	2.2	0	0
CLN3	CLN3, battenin	0.81	3.14	2.28	2.24
CTSB	cathepsin B	1.82	4.3	2.74	2.77
CTSD	cathepsin D	4.75	5.04	4.13	4.23
CTSS	cathepsin S	0.21	1.67	2.24	1.76
CXCR4	C-X-C motif chemokine receptor 4	0.23	3.6	1.23	0.51
DAPK1	death associated protein kinase 1	0.1	0.85	0	0.07
DRAM1	DNA damage regulated autophagy modulator 1	0.18	0.9	2.6	1.91
DRAM2	DNA damage regulated autophagy modulator 2	1.36	2.27	2.42	2
EIF2AK3	eukaryotic translation initiation factor 2 alpha kinase 3	0.19	1.23	0.57	0.7
EIF4G1	eukaryotic translation initiation factor 4 gamma 1	4.28	2.99	3.91	4.15
ESR1	estrogen receptor 1	0.28	0.08	0.01	0
EVA1A	eva-1 homolog A, regulator of programmed cell death	0.09	0.44	0	0
FADD	Fas associated via death domain	0.65	1.93	3.11	3.05
FAS	Fas cell surface death receptor	0.42	1.59	3.35	3.5
GAA	glucosidase alpha, acid	1.69	3.4	1.8	2.2
GABARAP	GABA type A receptor-associated protein	4.75	5.43	5.56	4.74
GABARAPL1	GABA type A receptor associated protein like 1	3.74	1.67	3.03	2.79
GABARAPL2	GABA type A receptor associated protein like 2	4	4.05	3.61	3.22
HDAC1	histone deacetylase 1	0.88	3.09	3.84	3.67
HDAC6	histone deacetylase 6	1.03	2.23	1.71	2.34
HGS	hepatocyte growth factor-regulated tyrosine kinase substrate	1.35	3.18	4.09	3.67
HSP90AA1	heat shock protein 90 alpha family class A member 1	5.24	4.64	5.83	5.92
HSPA8	heat shock protein family A (Hsp70) member 8	6.56	5.94	6.4	6.52
HTT	huntingtin	0.58	0.94	0.48	0.6
IFNG	interferon gamma	0	0.04	0	0
IGF1	insulin like growth factor 1	0.18	0.48	1.12	0.34
LAMP1	lysosomal associated membrane protein 1	2.39	4.43	4.1	4.11
LAMP2	lysosomal associated membrane protein 2	2.88	2.89	2.69	3.31
MAP1LC3A	microtubule associated protein 1 light chain 3 alpha	2.46	1.8	1.72	1.37
MAP1LC3B	microtubule associated protein 1 light chain 3 beta	4.16	4.1	3.4	3.35
MAPK14	mitogen-activated protein kinase 14	1.28	0.77	1.31	1.4
MAPK8	mitogen-activated protein kinase 8	0.98	0.88	1.73	1.43
MTOR	mechanistic target of rapamycin kinase	0.89	0.35	0.32	0.15
NFKB1	nuclear factor kappa B subunit 1	0.92	1.59	2.54	2.3
NPC1	NPC intracellular cholesterol transporter 1	0.43	1.13	2.89	3.23
PIK3C3	phosphatidylinositol 3-kinase catalytic subunit type 3	0.59	0.5	0.42	0.51
PIK3R4	phosphoinositide-3-kinase regulatory subunit 4	0.41	1.08	0.96	1.15
PRKAA1	protein kinase AMP-activated catalytic subunit alpha 1	0.9	1.48	1.71	2
PTEN	phosphatase and tensin homolog	0.05	0.09	0.65	0.16
RAB24	RAB24, member RAS oncogene family	1.57	3.01	1.89	1.48
RAB27A	RAB27A, member RAS oncogene family	0.22	1.38	1.49	1.21
RB1	RB transcriptional corepressor 1	1.62	2.55	1.78	1.74
RPS6KB1	ribosomal protein S6 kinase B1	1.31	1.01	2.24	1.71
SNCA	synuclein alpha	0.04	0.15	0.1	0.24
SQSTM1	sequestosome 1	1.44	0.68	1.01	0.84
TGFB1	transforming growth factor beta 1	0.43	4.52	3.42	3.07
TGM2	transglutaminase 2	1.2	5.94	5.34	4.28
TMEM74	transmembrane protein 74	0.03	0.01	0	0
TNF	tumor necrosis factor	0	0	0.11	0.03
TNFSF10	TNF superfamily member 10	1.59	1.26	3.16	4.39
TP53	tumor protein p53	0.43	3.2	2.86	3.66
TP73	tumor protein p73	0	0.01	0	0.01
ULK1	unc-51 like autophagy activating kinase 1	2.18	1.56	1.73	1.85
ULK2	unc-51 like autophagy activating kinase 2	1.03	0.67	0.89	0.93
UVRAG	UV radiation resistance associated	0.67	0.46	0.83	0.94
WIPI1	WD repeat domain, phosphoinositide interacting 1	2.6	2.54	0.82	1.22
